# Supplementary material for: Synthesis of Ni II porphyrin—Ni II 5,15-diazaporphyrin hybrid tapes
Source: Royal Society of Chemistry journal article supplement (doi:10.1039/d4sc01450b), 2024-01-01
Supplement: d4sc01450b1.pdf [file d4sc01450b1.pdf]

## Supporting Information

### Synthesis of Ni<sup>II</sup> Porphyrin—Ni<sup>II</sup> 5,15-Diazaporphyrin Hybrid Tapes

#### Contents

|                                                    |     |
|----------------------------------------------------|-----|
| 1. Instruments and Materials.....                  | S2  |
| 2. Experimental Procedures and Compound Data ..... | S2  |
| 3. NMR and EPR Spectra.....                        | S13 |
| 4. HR-MS spectra .....                             | S36 |
| 5. UV/Vis/NIR Absorption Spectra.....              | S45 |
| 6. Electrochemical Data .....                      | S48 |
| 7. X-Ray Crystal Data.....                         | S56 |
| 8. DFT calculations .....                          | S74 |
| 9. References .....                                | S75 |

## 1. Instruments and Materials

$^1\text{H}$  NMR (500 MHz) spectra were taken on a Bruker AVANCE-500 spectrometer, and chemical shifts were reported as delta scale in ppm relative to internal standards;  $\text{CDCl}_3$  ( $\delta = 7.26$ ) and Toluene- $d_8$  ( $\delta = 7.09, 7.01, 6.97, 2.08$ ) for  $^1\text{H}$  NMR. UV/Vis absorption spectra were measured at room temperature on a Shimadzu UV-3600 spectrometer. High-resolution mass spectra were obtained with a Bruker ultrafleXtreme MALDI-TOF/TOF spectrometer with matrix. X-Ray data were taken on an Agilent Supernova X-Ray diffractometer equipped with a large area CCD detector. Redox potentials were measured by cyclic voltammetry on a CHI900 scanning electrochemical microscope. EPR spectra were recorded with a Bruker Magnetech ESR5000 spectrometer. Unless otherwise noted, materials obtained from commercial suppliers were used without further purification.

## 2. Experimental Procedures and Compound Data

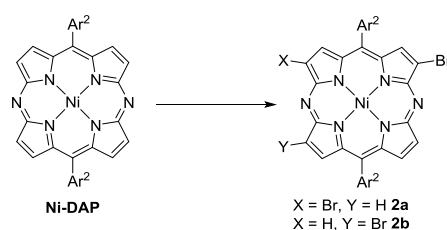

**Synthesis of 2a and 2b:** A solution of **Ni-DAP** (44 mg, 0.073 mmol) in  $\text{CHCl}_3$  (10 mL) was added NBS (27 mg, 0.152 mmol), and the resulting mixture was heated at reflux. After 5 h, the solvent was removed under reduced pressure, and the residual was purified by column chromatography on silica gel ( $\text{CH}_2\text{Cl}_2/n$ -hexane as an eluent) and recrystallization with  $\text{CH}_2\text{Cl}_2/\text{MeOH}$ , a mixture of **2a** and **2b** was obtained as purple solids (38 mg, 69%). HR-MS (MALDI-TOF):  $m/z = 762.0065$ , calcd for  $(\text{C}_{36}\text{H}_{28}\text{Br}_2\text{N}_6\text{Ni})^+ = 762.0068 [M]^+$ . The mixture of **2a** and **2b** was used in the next step without further purification.

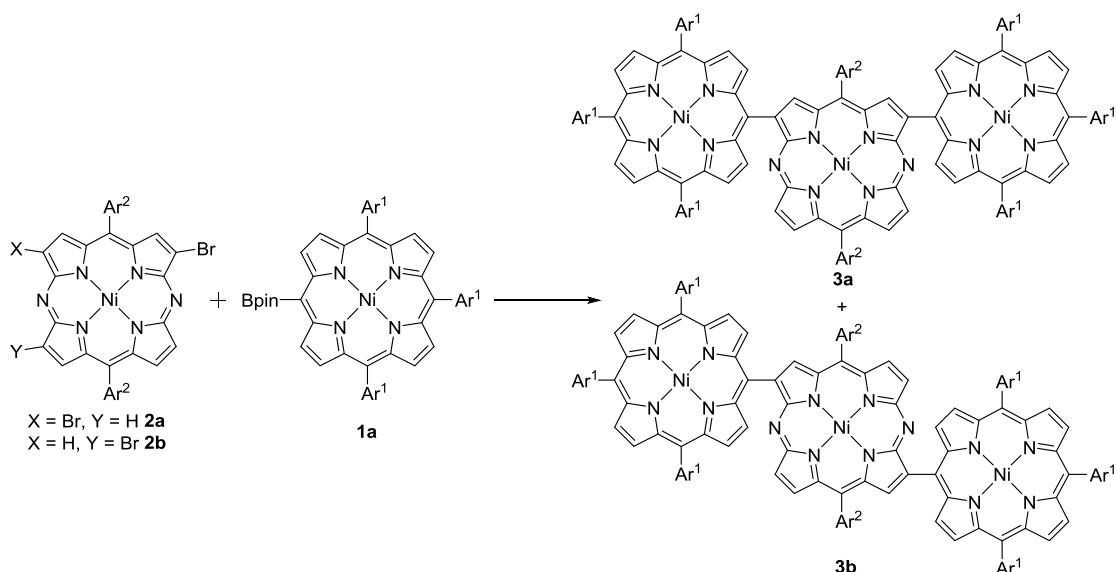

**Synthesis of 3a and 3b:** A solution of **2** (76.1 mg, 0.10 mmol), **1a** (211.6 mg, 0.20 mmol), Pd<sub>2</sub>(dba)<sub>3</sub> (9.16 mg, 0.01 mmol), PPh<sub>3</sub> (10.5 mg, 0.04 mmol), Cs<sub>2</sub>CO<sub>3</sub> (65.2 mg, 0.2 mmol), and CsF (30.4 mg, 0.2 mmol) in a mixture of toluene (4 mL) and DMF (2 mL) was degassed through three freeze-pump-thaw cycles, and the reaction flask was purged with argon. The resulting mixture was refluxed for 48 h. The reaction mixture was diluted with CHCl<sub>3</sub>, washed with water, and the organic layer was dried over anhydrous Na<sub>2</sub>SO<sub>4</sub>. After the solvent was evaporated under reduced pressure, the crude products were separated through a GPC column using CHCl<sub>3</sub> as an eluent. Separation of **3a** and **3b** was achieved by silica gel column chromatography using CH<sub>2</sub>Cl<sub>2</sub>/*n*-hexane as an eluent. Recrystallization with CH<sub>2</sub>Cl<sub>2</sub>/MeOH gave **3a** as red solids (69.0 mg, 0.028 mmol, 28% yield) and **3b** as green solids (69.0 mg, 0.028 mmol, 28% yield). The single crystals of **3a** suitable for X-ray diffraction experiments were grown from its *p*-xylene/MeOH solution.

**3a:** <sup>1</sup>H NMR (500 MHz, CDCl<sub>3</sub>, 233 K): δ = 9.70 (s, 2H, β-H), 8.95-8.91 (m, 10H, β-H), 8.87 (d, *J* = 5.0 Hz, 4H, β-H), 8.58 (s, 8H, β-H), 8.15 (br, 2H, Ar-*p*-H), 8.10 (br, 4H, Ar-*o*-H), 7.79 (br, 2H, Ar-*p*-H), 7.74 (br, 6H, Ar-*o*-H (4H) and Ar-*p*-H (2H)), 7.67 (br, 4H, Ar-*o*-H), 7.24 (s, 2H, Ar-*m*-H), 7.14 (s, 2H, Ar-*m*-H), 2.49 (s, 3H, *p*-Me), 2.41 (s, 3H, *p*-Me), 2.31 (s, 6H, *o*-Me), 1.71 (s, 6H, *o*-Me), 1.55 (s, 18H, *t*-Bu), 1.47 (s, 18H, *t*-Bu), 1.46 (s, 36H, *t*-Bu), and 1.42 (s, 36H, *t*-Bu) ppm; <sup>13</sup>C NMR (125 MHz, CDCl<sub>3</sub>): δ = 151.7, 151.6, 149.0, 148.9, 146.2, 144.6, 144.2, 143.1, 142.8, 142.7, 142.2, 140.18, 140.16, 139.0, 138.9, 138.5, 138.3, 137.2, 135.5, 135.2, 135.0, 133.2, 132.7, 132.6, 132.4, 132.2, 128.8, 128.7, 128.3, 127.9, 121.9, 121.1, 121.08, 120.7, 120.5, 120.4, 111.7, 35.1, 35.0, 31.8, and 31.7 ppm; UV/Vis (CH<sub>2</sub>Cl<sub>2</sub>): λ<sub>max</sub> (ε [M<sup>-1</sup>cm<sup>-1</sup>]) = 374 (71200), 422 (327000), 532 (54200), and 577 (40300) nm; HR-MS (MALDI-TOF): *m/z* = 2462.1635, calcd for (C<sub>160</sub>H<sub>171</sub>N<sub>14</sub>Ni<sub>3</sub>)<sup>+</sup> = 2462.1866 ([*M*+H]<sup>+</sup>).

**3b:** <sup>1</sup>H NMR (500 MHz, CDCl<sub>3</sub>, 233 K): δ = 9.54 (s, 2H, β-H), 8.93 (d, *J* = 5.0 Hz, 4H, β-H), 8.90 (d, *J* = 5.0 Hz, 4H, β-H), 8.85 (d, *J* = 5.0 Hz, 4H, β-H), 8.83 (d, *J* = 5.0 Hz, 4H, β-H), 8.70 (d, *J* = 5.0 Hz, 2H, β-H), 8.62 (d, *J* = 5.0 Hz, 2H, β-H), 8.12 (br, 2H, Ar-*p*-H), 8.07 (br, 4H, Ar-*o*-H), 7.77 (br, 2H, Ar-*p*-H), 7.72 (br, 2H, Ar-*p*-H), 7.71 (br, 4H, Ar-*o*-H), 7.64 (br, 4H, Ar-*o*-H), 7.17 (s, 4H, Ar-*m*-H), 2.43 (s, 6H, *p*-Me), 1.99 (s, 12H, *o*-Me), 1.53 (s, 18H, *t*-Bu), 1.46 (s, 18H, *t*-Bu), 1.44 (s, 36H, *t*-Bu), and 1.39 (s, 36H, *t*-Bu) ppm; <sup>13</sup>C NMR (125 MHz, CDCl<sub>3</sub>): δ = 151.7, 151.6, 149.0, 148.9, 146.3, 144.6, 144.1, 143.1, 142.7, 142.65, 142.2, 140.2, 140.1, 139.0, 138.4, 137.2, 135.3, 134.9, 133.3, 132.7, 132.5, 132.4, 132.2, 128.7, 128.6, 128.1, 121.2, 121.1, 121.06, 120.7, 120.4, 111.7, 35.1, 35.0, 31.8, and 31.7 ppm; UV/Vis (CH<sub>2</sub>Cl<sub>2</sub>): λ<sub>max</sub> (ε [M<sup>-1</sup>cm<sup>-1</sup>]) = 373 (73700), 424 (363000), 531 (51000), and 595 (47700) nm; HR-MS (MALDI-TOF): *m/z* = 2462.1656, calcd for (C<sub>160</sub>H<sub>171</sub>N<sub>14</sub>Ni<sub>3</sub>)<sup>+</sup> = 2462.1866 ([*M*+H]<sup>+</sup>).

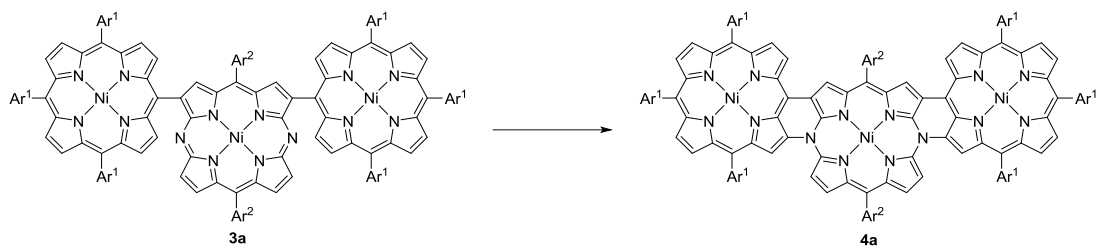

**Synthesis of 4a:** To a solution of **3a** (12.3 mg, 0.005 mmol) and AgOTf (128.5 mg, 0.5 mmol) in degassed anhydrous CH<sub>2</sub>Cl<sub>2</sub> (10 mL) was added a solution of FeCl<sub>3</sub> (8.1 mg, 0.05 mmol) and DDQ (11.4 mg, 0.05 mmol) in nitromethane (1 mL). The reaction mixture was stirred at room temperature for 1 h and the reaction was quenched by addition of a saturated NaHCO<sub>3</sub> solution. The reaction mixture was washed with water, and dried over anhydrous sodium sulfate. Evaporation of the solvent followed by silica-gel column chromatography (CH<sub>2</sub>Cl<sub>2</sub>/*n*-hexane as an eluent) and recrystallization with CH<sub>2</sub>Cl<sub>2</sub>/MeOH, **4a** obtained as a brown solid (4 mg, 0.0015 mmol, 30% yield).

**4a:** <sup>1</sup>H NMR (500 MHz, Toluene-*d*<sub>8</sub>, 298 K): δ = 9.19 (d, *J* = 5.0 Hz, 2H, β-H), 9.04 (s, 2H, β-H), 8.83 (d, *J* = 5.0 Hz, 2H, β-H), 8.77 (d, *J* = 5.0 Hz, 2H, β-H), 8.72 (d, *J* = 5.0 Hz, 2H, β-H), 8.68 (d, *J* = 5.0 Hz, 2H, β-H), 8.62 (d, *J* = 5.0 Hz, 2H, β-H), 8.17 (br, 4H, Ar-*o*-H), 7.95 (br, 4H, Ar-*o*-H), 7.92 (br, 4H, Ar-*o*-H), 7.84 (br, 2H, Ar-*p*-H), 7.82 (br, 2H, Ar-*p*-H), 7.79 (br, 2H, Ar-*p*-H), 7.56 (s, 2H, β-H), 7.11 (br, 2H, β-H), 6.90 (s, 2H, Ar-*m*-H), 6.85 (s, 2H, Ar-*m*-H), 6.37 (d, *J* = 5.0 Hz, 2H, β-H), 2.45 (s, 6H, *o*-Me), 2.37 (s, 6H, *o*-Me), 2.25 (s, 3H, *p*-Me), 2.22 (s, 3H, *p*-Me), 1.46 (s, 36H, *t*-Bu), 1.40 (s, 36H, *t*-Bu), and 1.37 (s, 36H, *t*-Bu) ppm; <sup>13</sup>C NMR (125 MHz, CDCl<sub>3</sub>): δ = 151.1, 149.5, 149.01, 148.98, 148.9, 144.0, 143.6, 142.7, 141.4, 139.9, 139.8, 138.2, 138.0, 137.7, 137.4, 137.2, 136.5, 133.0, 132.9, 132.6, 132.5, 132.4, 131.1, 129.9, 129.4, 128.7, 128.6, 128.5, 128.34, 128.26, 128.1, 125.1, 121.7, 121.1, 121.0, 120.9, 119.5, 118.2, 109.4, 106.9, 106.3, 35.1, 35.0, 31.73, 31.70, and 31.69 ppm; UV/Vis (CH<sub>2</sub>Cl<sub>2</sub>): λ<sub>max</sub> (ε [M<sup>-1</sup>cm<sup>-1</sup>]) = 412 (109800), 473 (78200), 564 (71800), 815 (96800), and 1054 (94900) nm; HR-MS (MALDI-TOF): *m/z* = 2459.1427, calcd for (C<sub>160</sub>H<sub>168</sub>N<sub>14</sub>Ni<sub>3</sub>)<sup>+</sup> = 2459.1631 ([M]<sup>+</sup>).

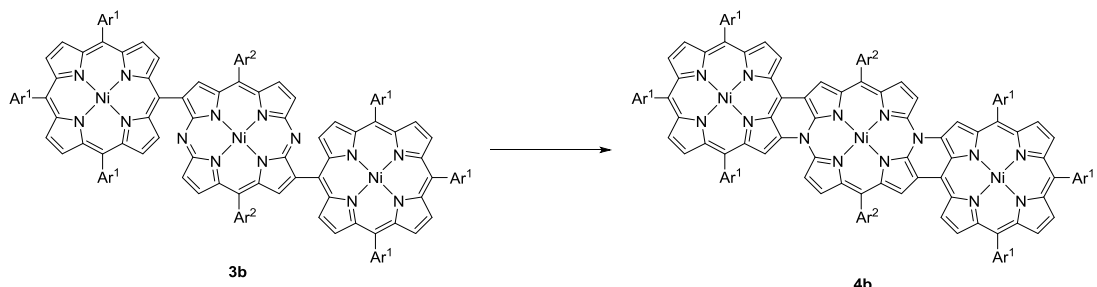

**Synthesis of 4b:** To a solution of **3b** (12.3 mg, 0.005 mmol) and AgOTf (128.5 mg, 0.5 mmol) in degassed anhydrous DCM (10 mL) was added a solution of FeCl<sub>3</sub> (8.1 mg, 0.05 mmol) and DDQ (11.3 mg, 0.05 mmol) in nitromethane (1 mL). The reaction mixture was carried out at room temperature for 1 h and quenched by addition of a saturated NaHCO<sub>3</sub> solution. The

reaction mixture was washed with water, and dried over anhydrous sodium sulfate. Evaporation of the solvent followed by silica-gel column chromatography (CH<sub>2</sub>Cl<sub>2</sub>/*n*-hexane as an eluent) and recrystallization with CH<sub>2</sub>Cl<sub>2</sub>/MeOH, **4b** obtained as a brown solid (5 mg, 0.0016 mmol, 32% yield).

**4b**: <sup>1</sup>H NMR (500 MHz, toluene-*d*<sub>8</sub>, 298 K): δ = 9.28 (d, *J* = 5.0 Hz, 2H, β-H), 9.01 (s, 2H, β-H), 8.81 (d, *J* = 5.0 Hz, 2H, β-H), 8.77 (d, *J* = 5.0 Hz, 2H, β-H), 8.74 (d, *J* = 5.0 Hz, 2H, β-H), 8.72 (d, *J* = 5.0 Hz, 2H, β-H), 8.65 (d, *J* = 5.0 Hz, 2H, β-H), 8.15 (br, 4H, Ar-*o*-H), 7.96 (br, 4H, Ar-*o*-H), 7.95 (br, 4H, Ar-*o*-H), 7.84 (t, *J* = 1.5 Hz, 2H, Ar-*p*-H), 7.80 (m, 4H, Ar-*p*-H), 7.62 (s, 2H, β-H), 7.07 (br, 2H, β-H), 6.90 (s, 4H, Ar-*m*-H), 6.38 (d, *J* = 5.0 Hz, 2H, β-H), 2.42 (s, 12H, *o*-Me), 2.25 (s, 6H, *p*-Me), 1.42 (s, 36H, *t*-Bu), 1.40 (s, 36H, *t*-Bu), and 1.39 (s, 36H, *t*-Bu) ppm; <sup>13</sup>C NMR (125 MHz, toluene-*d*<sub>8</sub>): δ = 153.3, 150.3, 149.8, 149.7, 148.1, 145.4, 144.9, 144.0, 142.7, 142.1, 141.7, 141.64, 141.57, 141.1, 141.0, 139.4, 138.5, 137.0, 136.2, 135.9, 134.1, 133.43, 133.38, 133.3, 133.1, 132.5, 131.8, 130.3, 130.0, 123.8, 122.6, 121.7, 121.6, 121.5, 120.3, 118.7, 117.7, 109.43, 109.38, 108.7, 35.6, 35.53, 35.52, 32.22, 32.18, and 32.15 ppm; UV/Vis (CH<sub>2</sub>Cl<sub>2</sub>): λ<sub>max</sub> (ε [M<sup>-1</sup>cm<sup>-1</sup>]) = 409 (81000), 473 (51500), 560 (50600), 624 (24700), and 857 (138000) nm; HR-MS (MALDI-TOF): *m/z* = 2459.1584, calcd for (C<sub>160</sub>H<sub>168</sub>N<sub>14</sub>Ni<sub>3</sub>)<sup>+</sup> = 2459.1631 ([M]<sup>+</sup>).

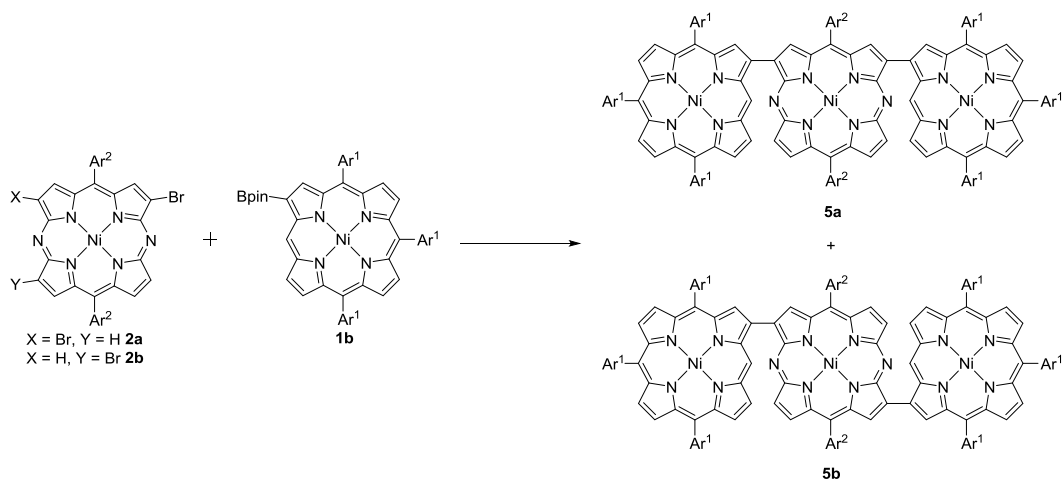

**Synthesis of 5a and 5b**: A solution of **2** (76.1 mg, 0.10 mmol, 1.0 equiv.), **1b** (211.6 mg, 0.20 mmol, 2.0 equiv.), Pd<sub>2</sub>(dba)<sub>3</sub> (9.16 mg, 0.01 mmol, 10 mol %), PPh<sub>3</sub> (10.5 mg, 0.04 mmol, 40 mol %), Cs<sub>2</sub>CO<sub>3</sub> (65.2 mg, 0.2 mmol, 2.0 equiv.) and CsF (30.4 mg, 0.2 mmol, 2.0 equiv.) in a mixture of toluene (4 mL) and DMF (2 mL) was degassed through three freeze-pump-thaw cycles, and the reaction flask was purged with argon. The resulting mixture was refluxed for 48 h. The reaction mixture was diluted with CHCl<sub>3</sub>, and the organic extract was washed with water and dried over anhydrous Na<sub>2</sub>SO<sub>4</sub>. After the solvent was evaporated under reduced pressure, the crude products were separated through a GPC column using CHCl<sub>3</sub> as an eluent. Separation of **5a** and **5b** was achieved by silica gel column chromatography using CH<sub>2</sub>Cl<sub>2</sub>/*n*-hexane as an eluent. Recrystallization with CH<sub>2</sub>Cl<sub>2</sub>/MeOH gave **5a** as green solids (80.0 mg, 0.032 mmol, 33% yield) and **5b** as green solids (90.5 mg, 0.037 mmol, 37% yield).

**5a**: <sup>1</sup>H NMR (500 MHz, CDCl<sub>3</sub>, 298 K): δ = 10.46 (s, 2H, *meso*-H), 10.11 (s, 2H, β-H), 9.51

(s, 2H,  $\beta$ -H), 9.05-9.02 (m, 4H,  $\beta$ -H), 8.97-8.95 (m, 4H,  $\beta$ -H), 8.92-8.87 (m, 6H,  $\beta$ -H), 8.80 (d,  $J = 5.0$  Hz, 2H,  $\beta$ -H), 8.19 (d,  $J = 2.0$  Hz, 4H, Ar-*o*-H), 7.97 (d,  $J = 2.0$  Hz, 4H, Ar-*o*-H), 7.96 (d,  $J = 2.0$  Hz, 4H, Ar-*o*-H), 7.81 (t,  $J = 2.0$  Hz, 2H, Ar-*p*-H), 7.77 (br, 4H, Ar-*p*-H), 7.39 (s, 2H, Ar-*m*-H), 7.30 (s, 2H, Ar-*m*-H), 2.63 (s, 3H, *p*-Me), 2.55 (s, 3H, *p*-Me), 2.33 (s, 6H, *o*-Me), 1.90 (s, 6H, *o*-Me), 1.57 (s, 36H, *t*-Bu), 1.52 (s, 72H, *t*-Bu) ppm;  $^{13}\text{C}$  NMR (125 MHz,  $\text{CDCl}_3$ ):  $\delta = 151.5, 149.6, 149.1, 149.05, 149.0, 144.1, 143.9, 143.5, 143.4, 143.38, 143.13, 143.05, 142.9, 142.5, 142.3, 141.2, 140.5, 140.3, 140.2, 139.3, 139.1, 138.8, 138.5, 138.0, 135.6, 135.4, 134.7, 133.3, 133.2, 132.7, 132.5, 132.4, 132.3, 132.2, 129.1, 128.9, 128.8, 128.5, 128.1, 121.2, 121.14, 121.11, 120.7, 120.6, 120.0, 105.2, 35.2, 35.1, 31.9, 31.8$  ppm; UV/Vis ( $\text{CH}_2\text{Cl}_2$ ):  $\lambda_{\text{max}}$  ( $\epsilon$  [ $\text{M}^{-1}\text{cm}^{-1}$ ]) = 415 (322000), 532 (54400), 584 (51000) nm; HR-MS (MALDI-TOF):  $m/z = 2462.2041$ , calcd for  $(\text{C}_{160}\text{H}_{171}\text{N}_{14}\text{Ni}_3)^+ = 2462.1866$  ( $[\text{M}+\text{H}]^+$ ).

**5b**:  $^1\text{H}$  NMR (500 MHz,  $\text{CDCl}_3$ , 298 K):  $\delta = 10.39$  (s, 2H, *meso*-H), 10.07 (s, 2H,  $\beta$ -H), 9.41 (s, 2H,  $\beta$ -H), 9.03 (d,  $J = 5.0$  Hz, 2H,  $\beta$ -H), 9.00 (d,  $J = 5.0$  Hz, 2H,  $\beta$ -H), 8.94-8.91 (m, 4H,  $\beta$ -H), 8.89 (d,  $J = 5.0$  Hz, 2H,  $\beta$ -H), 8.86-8.83 (m, 6H,  $\beta$ -H), 8.16 (d,  $J = 2.0$  Hz, 4H, Ar-*o*-H), 7.95 (d,  $J = 1.5$  Hz, 4H, Ar-*o*-H), 7.94 (d,  $J = 2.0$  Hz, 4H, Ar-*o*-H), 7.79 (t,  $J = 1.75$  Hz, 2H, Ar-*p*-H), 7.74 (t,  $J = 1.75$  Hz, 4H, Ar-*p*-H), 7.32 (s, 4H, Ar-*m*-H), 2.57 (s, 6H, *p*-Me), 2.09 (s, 12H, *o*-Me), 1.54 (s, 36H, *t*-Bu), 1.50 (s, 72H, *t*-Bu) ppm;  $^{13}\text{C}$  NMR (125 MHz,  $\text{CDCl}_3$ ):  $\delta = 151.5, 149.4, 149.0, 148.98, 148.9, 144.3, 143.5, 143.4, 143.31, 143.30, 143.0, 142.97, 142.8, 142.4, 142.2, 140.9, 140.4, 140.3, 140.1, 139.1, 138.6, 138.0, 135.4, 135.3, 134.9, 133.4, 133.0, 132.6, 132.5, 132.3, 132.2, 132.17, 129.1, 128.9, 128.8, 128.2, 121.2, 121.10, 121.08, 120.6, 120.5, 119.9, 105.1, 35.1, 35.0, 31.9, 31.7$  ppm; UV/Vis ( $\text{CH}_2\text{Cl}_2$ ):  $\lambda_{\text{max}}$  ( $\epsilon$  [ $\text{M}^{-1}\text{cm}^{-1}$ ]) = 417 (220000), 526 (29800), 638 (44100) nm; HR-MS (MALDI-TOF):  $m/z = 2462.2031$ , calcd for  $(\text{C}_{160}\text{H}_{171}\text{N}_{14}\text{Ni}_3)^+ = 2462.1866$  ( $[\text{M}+\text{H}]^+$ ).

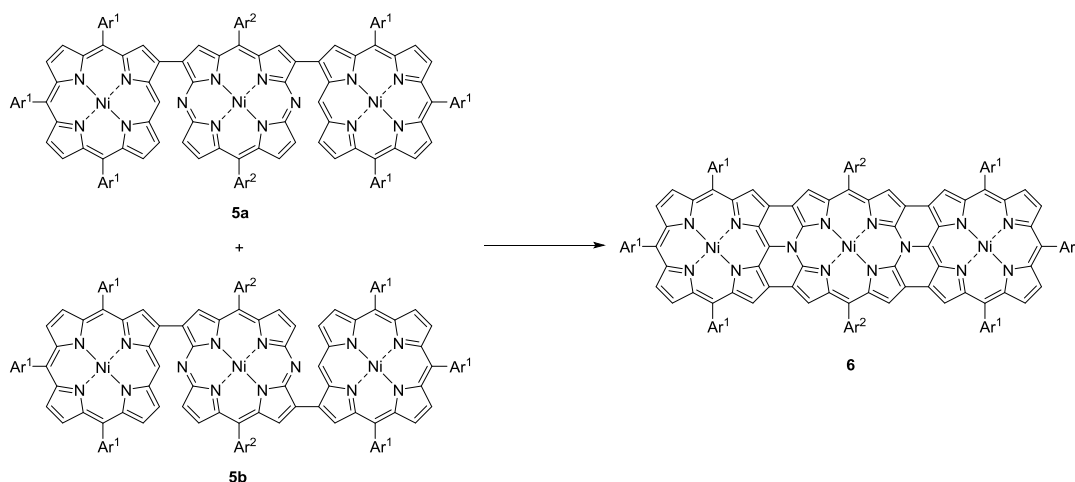

**Synthesis of 6:** To a solution of a ca. 1:1 mixture of **5a** and **5b** (12.3 mg, 0.005 mmol, 1.0 equiv.) and AgOTf (128.5 mg, 0.5 mmol, 100.0 equiv.) in degassed anhydrous  $\text{CH}_2\text{Cl}_2$  (10 mL) was added a solution of  $\text{FeCl}_3$  (8.1 mg, 0.05 mmol, 10 equiv.) and DDQ (11.4 mg, 0.05 mmol, 10 equiv.) in nitromethane (1 mL). The reaction mixture was stirred at room temperature for 1

h and the reaction was quenched by addition of a saturated NaHCO<sub>3</sub> solution. The product was extracted with CH<sub>2</sub>Cl<sub>2</sub> and the organic extract was washed with water, and dried over anhydrous Na<sub>2</sub>SO<sub>4</sub>. Evaporation of the solvent followed by silica-gel column chromatography (CH<sub>2</sub>Cl<sub>2</sub>/*n*-hexane as an eluent) and recrystallization with CH<sub>2</sub>Cl<sub>2</sub>/MeOH gave **6** as green solids (5.5 mg, 0.0022 mmol, 45% yield). Oxidation of **5a** and **5b** with DDQ and FeCl<sub>3</sub> under the similar conditions gave **6** in 25% yield along with  $\beta$ -chlorinated products **6-Cl** in ca. 10%. Oxidations of pure **5a** and **5b** under the optimized conditions **6** in ca. 25% yield.

**6**: <sup>1</sup>H NMR (500 MHz, toluene-*d*<sub>8</sub>, 298 K):  $\delta$  = 9.14 (s, 4H,  $\beta$ -H), 8.81 (d, *J* = 3.8 Hz, 4H,  $\beta$ -H), 8.76 (d, *J* = 3.8 Hz, 4H,  $\beta$ -H), 8.13 (s, 8H, Ar), 8.02 (s, 4H,  $\beta$ -H), 7.85(br, 10H, Ar), 6.93 (s, 4H, Ar-*m*-H), 2.45 (s, 12H, *o*-Me), 2.36 (s, 6H, *p*-Me), 1.41 (d, *J* = 6.3 Hz, 108H, *t*-Bu)ppm; <sup>13</sup>C NMR (125 MHz, Toluene-*d*<sub>8</sub>):  $\delta$  = 149.9, 149.8, 146.8, 145.0, 144.0, 142.1, 141.9, 139.8, 138.4, 135.6, 135.3, 133.7, 132.2, 131.5, 121.9, 121.8, 121.5, 121.1, 118.7, 117.8, 116.7, 114.1, 35.5, 32.2, and 32.1 ppm; UV/Vis (CH<sub>2</sub>Cl<sub>2</sub>):  $\lambda_{\max}$  ( $\epsilon$  [M<sup>-1</sup>cm<sup>-1</sup>]) = 315 (44200), 427 (94800), 672 (239000), and 953 (290000) nm; HR-MS (MALDI-TOF): *m/z* = 2455.1405, calcd for (C<sub>160</sub>H<sub>164</sub>N<sub>14</sub>Ni<sub>3</sub>)<sup>+</sup> = 2455.1318 ([M]<sup>+</sup>).

**6-Cl**: <sup>1</sup>H NMR (500 MHz, CDCl<sub>3</sub>, 298 K):  $\delta$  = 8.75 (d, 1H, *J* = 5.0 Hz,  $\beta$ -H), 8.69 (d, 1H, *J* = 5.0 Hz,  $\beta$ -H), 8.65-8.58 (m, 6H,  $\beta$ -H), 8.11 (s, 1H,  $\beta$ -H), 7.92 (m, 4H,  $\beta$ -H), 7.90 (m, 2H,  $\beta$ -H), 7.85-7.68 (m, 18H, Ar-H), 7.29 (s, 4H, C<sub>6</sub>H<sub>2</sub>Me<sub>3</sub>), 2.65 (s, 3H, Me), 2.63 (s, 3H, Me), 2.46-2.44 (m, 12 H, Me), 1.54-1.52 (m, 54H, <sup>t</sup>Bu), 1.48-1.46 (m, 54H, <sup>t</sup>Bu)

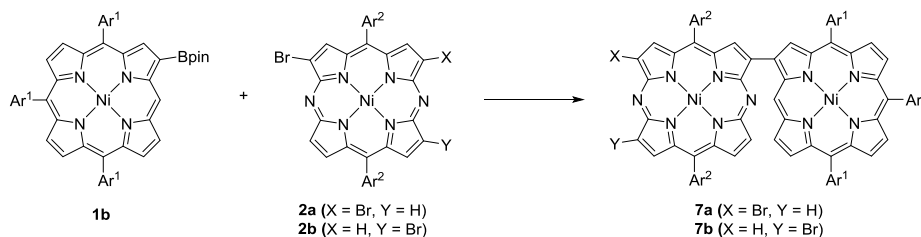

**Synthesis of 7**: A solution of **1b** (105.8 mg, 0.10 mmol, 1.0 equiv.), **2** (a mixture of **2a** and **2b**) (218.9 mg, 0.30 mmol, 3.0 equiv.), Pd<sub>2</sub>(dba)<sub>3</sub> (2.8 mg, 0.003 mmol, 3 mol %), PPh<sub>3</sub> (3.2 mg, 0.012 mmol, 12 mol %), Cs<sub>2</sub>CO<sub>3</sub> (37.6 mg, 0.10 mmol, 1.0 equiv.), and CsF (15.2 mg, 0.10 mmol, 1.0 equiv.) in a mixture of toluene (4 mL) and DMF (2 mL) was degassed through three freeze-pump-thaw cycles, and the reaction flask was purged with argon. The resulting mixture was stirred at 110 °C for 24 h. The reaction mixture was diluted with CHCl<sub>3</sub>, and the organic layer was dried over anhydrous Na<sub>2</sub>SO<sub>4</sub>. After the solvent was evaporated under reduced pressure, the crude products were separated through a GPC column using CHCl<sub>3</sub> as an eluent and through a silica gel column using CH<sub>2</sub>Cl<sub>2</sub>/*n*-hexane as an eluent. Recrystallization with CH<sub>2</sub>Cl<sub>2</sub>/MeOH gave **7** as dark green solids (82.2 mg, 0.051 mmol, 51% yield).

**7** (a mixture of **7a** and **7b**): <sup>1</sup>H NMR (500 MHz, CDCl<sub>3</sub>, 298 K):  $\delta$  = 10.36-10.32 (*meso*-H), 10.06-10.02 ( $\beta$ -H), 9.41-9.29 ( $\beta$ -H), 9.00-8.70 ( $\beta$ -H), 8.16-7.71 (Ar) 7.35-7.27 (Ar-*m*-H), 2.64-2.56 (*p*-Me), 2.10-1.83 (*o*-Me), and 1.54-1.49 (*t*-Bu) ppm; UV/Vis (CH<sub>2</sub>Cl<sub>2</sub>):  $\lambda_{\max}$  ( $\epsilon$  [M<sup>-1</sup>cm<sup>-1</sup>]) = 416 (257000), 531 (32000), and 588 (47500) nm; HR-MS (MALDI-TOF): *m/z* =

1611.5995, calcd for  $(C_{98}H_{100}BrN_{10}Ni_2)^+ = 1611.6017 [M+H]^+$ .

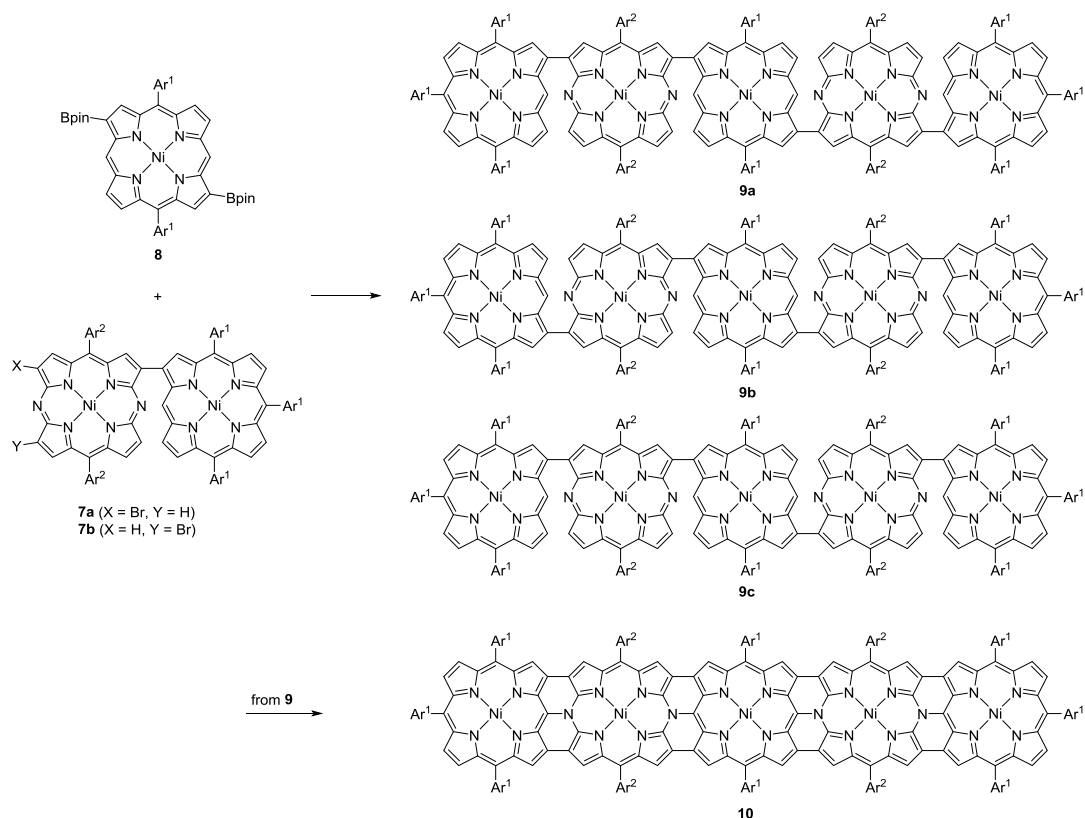

**Synthesis of 9:** A solution of **8** (39.8 mg, 0.04 mmol, 1.0 equiv.), **7** (a mixture of **7a** and **7b**) (129.1 mg, 0.08 mmol, 2.0 equiv.),  $Pd_2(dba)_3$  (3.6 mg, 0.004 mmol, 10 mol %),  $PPh_3$  (4.2 mg, 0.016 mmol, 40 mol %),  $Cs_2CO_3$  (30.0 mg, 0.08 mmol, 2.0 equiv.), and  $CsF$  (12.1 mg, 0.08 mmol, 2.0 equiv.) in a mixture of toluene (4 mL) and DMF (2 mL) was degassed through three freeze-pump-thaw cycles, and the reaction flask was purged with argon. The resulting mixture was refluxed for 48 h. The reaction mixture was diluted with  $CHCl_3$ , and the products were extracted with  $CH_2Cl_2$ . The organic extract was washed with water and dried over anhydrous  $Na_2SO_4$ . After concentrating under reduced pressure, the crude product was separated by GPC (eluent:  $CHCl_3$ ) and silica gel column chromatography (eluent:  $CH_2Cl_2/n$ -hexane). Precipitation with  $CH_2Cl_2/MeOH$  gave **9** obtained as dark green solids (92 mg, 0.024 mmol, 61% yield).

**9** (a mixture of **9a**, **9b**, and **9c**):  $^1H$  NMR (500 MHz,  $CDCl_3$ , 298 K):  $\delta = 10.59$ - $10.42$  (*meso*-H),  $10.23$ - $8.80$  ( $\beta$ -H),  $8.47$ - $7.76$  (Ar),  $7.40$ - $7.31$  (Ar-*m*-H),  $2.63$ - $1.91$  (*o*-Me and *p*-Me),  $1.59$ - $1.51$  (*t*-Bu) ppm; UV/Vis ( $CH_2Cl_2$ ):  $\lambda_{max}$  ( $\epsilon [M^{-1}cm^{-1}]$ ) = 414(484000), 529 (89600), 627 (107000) nm; HR-MS (MALDI-TOF):  $m/z = 3804.6956$ , calcd for  $(C_{244}H_{249}N_{24}Ni_5)^+ = 3804.6984 ([M+H]^+)$ .

**Synthesis of 10:** To a solution of **9** (15.2 mg, 0.004 mmol) and  $AgOTf$  (205.5 mg, 0.8 mmol) in degassed anhydrous DCM (10 mL) was added a solution of  $FeCl_3$  (26.0 mg, 0.16 mmol) and DDQ (36.3 mg, 0.16 mmol) in nitromethane (1 mL). The reaction mixture was carried out



at room temperature for 1 h and quenched by addition of a saturated NaHCO<sub>3</sub> solution. The reaction mixture was washed with water, and dried over anhydrous sodium sulfate. Evaporation of the solvent followed by silica-gel column chromatography (CH<sub>2</sub>Cl<sub>2</sub>/*n*-hexane as an eluent) and recrystallization with CH<sub>2</sub>Cl<sub>2</sub>/MeOH, **10** obtained as a brown solid (2.4 mg, 0.0006 mmol, 16% yield).

**10**: <sup>1</sup>H NMR (500 MHz, Toluene-*d*<sub>8</sub>, 298 K): δ = 9.17 (s, 4H, β-H), 9.05 (s, 4H, β-H), 8.82 (d, *J* = 5.0 Hz, 4H, β-H), 8.76 (d, *J* = 5.0 Hz, 4H, β-H), 8.20 (br, 4H, β-H), 8.12 (d, *J* = 1.0 Hz, 8H, Ar), 8.00 (br, 4H, β-H), 7.86-7.79 (m, 24H, Ar), 2.43 (s, 24H, *o*-Me), 2.34 (s, 12H, *p*-Me), 1.40 (s, 36H, *t*-Bu), 1.39 (s, 72H, *t*-Bu), 1.36 (s, 36H, *t*-Bu) ppm; UV/Vis (CH<sub>2</sub>Cl<sub>2</sub>): λ<sub>max</sub> (ε [M<sup>-1</sup>cm<sup>-1</sup>]) = 326 (75200), 405 (116000), 737 (287000), 1037 (66600), 1168 (558000) nm; HR-MS (MALDI-TOF): *m/z* = 3791.5733, calcd for (C<sub>244</sub>H<sub>236</sub>N<sub>24</sub>Ni<sub>5</sub>)<sup>+</sup> = 3791.5966 ([*M*]<sup>+</sup>).

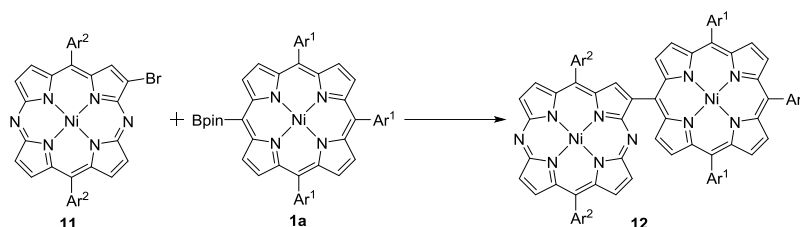

**Synthesis of 12**: A solution of **11** (68.4 mg, 0.10 mmol, 1.0 equiv.), **1a** (105.8 mg, 0.10 mmol, 1.0 equiv.), Pd<sub>2</sub>(dba)<sub>3</sub> (4.58 mg, 0.005 mmol, 5 mol %), PPh<sub>3</sub> (5.24 mg, 0.02 mmol, 20 mol %), Cs<sub>2</sub>CO<sub>3</sub> (32.6 mg, 0.10 mmol, 1.0 equiv.), and CsF (15.2 mg, 0.10 mmol, 1.0 equiv.) in a mixture of toluene (4 mL) and DMF (2 mL) was degassed through three freeze-pump-thaw cycles, and the reaction flask was purged with argon. The resulting mixture was refluxed for 48 h. The reaction mixture was diluted with CHCl<sub>3</sub>, and the organic layer was washed with water, and dried over anhydrous Na<sub>2</sub>SO<sub>4</sub>. After the solvent was evaporated under reduced pressure, the crude products were separated through a GPC column using CH<sub>2</sub>Cl<sub>2</sub>/*n*-hexane as an eluent. Recrystallization with CH<sub>2</sub>Cl<sub>2</sub>/MeOH gave **12** as dark green solids (108.5 mg, 0.071 mmol, 71% yield).

**12**: <sup>1</sup>H NMR (500 MHz, CDCl<sub>3</sub>, 233 K): δ = 9.58 (s, 1H, β-H), 9.31 (d, *J* = 5.0 Hz, 1H, β-H), 9.26 (d, *J* = 5.0 Hz, 1H, β-H), 9.00 (d, *J* = 5.0 Hz, 1H, β-H), 8.96 (d, *J* = 5.0 Hz, 2H, β-H), 8.93 (d, *J* = 5.0 Hz, 2H, β-H), 8.87 (d, *J* = 5.0 Hz, 1H, β-H), 8.83 (br, 4H, β-H), 8.60 (d, *J* = 5.0 Hz, 1H, β-H), 8.57 (d, *J* = 5.0 Hz, 1H, β-H), 8.15 (br, 1H, Ar-*p*-H), 8.08 (br, 2H, Ar-*o*-H), 7.79 (br, 1H, Ar-*p*-H), 7.74 (br, 1H, Ar-*p*-H), 7.73 (br, 2H, Ar-*o*-H), 7.66 (br, 2H, Ar-*o*-H), 7.27 (s, 2H, Ar-*m*-H), 7.22 (s, 2H, Ar-*m*-H), 2.56 (s, 3H, *p*-Me), 2.52 (s, 3H, *p*-Me), 2.07 (s, 6H, *o*-Me), 1.77 (s, 6H, *o*-Me), 1.55 (s, 9H, *t*-Bu), 1.47 (s, 9H, *t*-Bu), 1.45 (s, 18H, *t*-Bu), and 1.41 (s, 18H, *t*-Bu) ppm; UV/Vis (CH<sub>2</sub>Cl<sub>2</sub>): λ<sub>max</sub> (ε [M<sup>-1</sup>cm<sup>-1</sup>]) = 372 (94800), 421 (317000), 532 (38400), and 581 (60600) nm; HR-MS (MALDI-TOF): *m/z* = 1533.6948, calcd for (C<sub>98</sub>H<sub>101</sub>N<sub>10</sub>Ni<sub>2</sub>)<sup>+</sup> = 1533.6912 ([*M*+H]<sup>+</sup>).

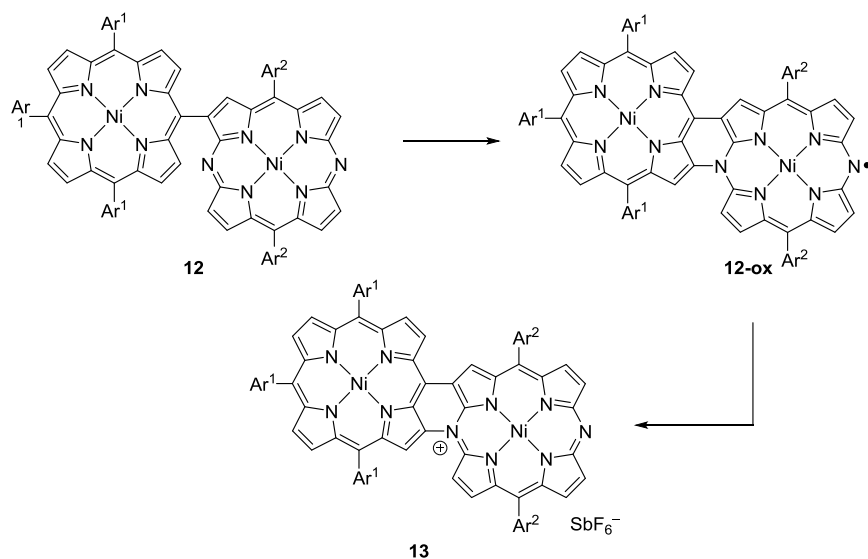

**Synthesis of 13:** To a solution of **12** (15.3 mg, 0.01 mmol, 1.0 equiv.) in degassed anhydrous  $\text{CH}_2\text{Cl}_2$  (10 mL) was added a solution of  $\text{FeCl}_3$  (8.1 mg, 0.05 mmol, 5 equiv.) and DDQ (11.4 mg, 0.05 mmol, 5 equiv.) in nitromethane (1 mL). The reaction mixture was stirred at room temperature for 1 h and the reaction was quenched by addition of a saturated  $\text{NaHCO}_3$  solution. The product was extracted with  $\text{CH}_2\text{Cl}_2$  and the organic extract was washed with water, and dried over anhydrous  $\text{Na}_2\text{SO}_4$ . After concentrating under reduced pressure, the residue was dissolved in  $\text{CH}_2\text{Cl}_2$  under  $\text{N}_2$ , to which  $\text{TBPA}\cdot\text{SbF}_6$  (7.90 mg, 0.011 mmol, 1.1 equiv.) was added and the reaction mixture was further stirred for 1 h at room temperature. The reaction mixture was passed through a short Celite pad with  $\text{CH}_2\text{Cl}_2$  as an eluent. Recrystallization from  $\text{CH}_2\text{Cl}_2/n$ -hexane afforded **13** (10 mg, 0.006 mmol, 60%).

**12-ox:** UV/Vis ( $\text{CH}_2\text{Cl}_2$ ):  $\lambda_{\text{max}}$  ( $\epsilon$  [ $\text{M}^{-1}\text{cm}^{-1}$ ]) = 316 (32500), 430 (63100), 472 (67500), 543 (37600), 776 (30900), and 1357 (7860) nm; HR-MS (MALDI-TOF):  $m/z$  = 1531.6771, calcd for  $(\text{C}_{98}\text{H}_{99}\text{N}_{10}\text{Ni}_2)^+$  = 1531.6756 ( $[M]^+$ ).

**13:**  $^1\text{H}$  NMR (500 MHz,  $\text{CDCl}_3$ , 298 K):  $\delta$  = 9.07 (s, 1H,  $\beta$ -H), 8.52 (br, 6H,  $\beta$ -H), 8.28-8.25 (m, 5H,  $\beta$ -H), 7.81-7.70 (m, 11H,  $\beta$ -H and Ar), 7.29 (s, 2H, Ar-*m*-H), 7.27 (s, 2H, Ar-*m*-H), 2.60 (s, 6H, *p*-Me), 2.03 (s, 6H, *o*-Me), 1.95 (s, 6H, *o*-Me), 1.49 (s, 18H, *t*-Bu), 1.48 (s, 18H, *t*-Bu), and 1.45 (s, 18H, *t*-Bu) ppm; UV/Vis ( $\text{CH}_2\text{Cl}_2$ ):  $\lambda_{\text{max}}$  ( $\epsilon$  [ $\text{M}^{-1}\text{cm}^{-1}$ ]) = 436 (57100), 748 (11700), and 1020 (24600) nm; HR-MS (MALDI-TOF):  $m/z$  = 1531.6747, calcd for  $(\text{C}_{98}\text{H}_{99}\text{N}_{10}\text{Ni}_2)^+$  = 1531.6756 ( $[M\text{-SbF}_6]^+$ ).

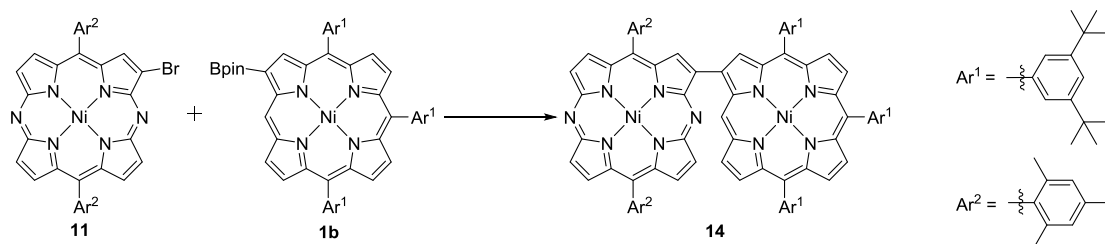

**Synthesis of 14:** A solution of **11** (68.4 mg, 0.10 mmol, 1.0 equiv.), **1b** (105.8 mg, 0.10 mmol, 1.0 equiv.), Pd<sub>2</sub>(dba)<sub>3</sub> (4.58 mg, 0.005 mmol, 5 mol %), PPh<sub>3</sub> (5.24 mg, 0.02 mmol, 20 mol %), Cs<sub>2</sub>CO<sub>3</sub> (32.6 mg, 0.10 mmol, 1.0 equiv.), and CsF (15.2 mg, 0.10 mmol, 1.0 equiv.) in a mixture of toluene (4 mL) and DMF (2 mL) was degassed through three freeze-pump-thaw cycles, and the reaction flask was purged with argon. The resulting mixture was refluxed for 48 h. The reaction mixture was diluted with CHCl<sub>3</sub>, and the organic extract was washed with water and dried over anhydrous Na<sub>2</sub>SO<sub>4</sub>. After the solvent was evaporated under reduced pressure, the crude product was separated through a GPC column using CHCl<sub>3</sub> as an eluent and through a silica gel column using CH<sub>2</sub>Cl<sub>2</sub>/*n*-hexane as an eluent. Recrystallization with CH<sub>2</sub>Cl<sub>2</sub>/MeOH gave **14** obtained as dark green solids (115.1 mg, 0.075 mmol, 75% yield).

**14:** <sup>1</sup>H NMR (500 MHz, CDCl<sub>3</sub>, 298 K): δ = 10.35 (s, 1H, *meso*-H), 10.03 (s, 1H, β-H), 9.39 (s, 1H, β-H), 9.24 (d, *J* = 5.0 Hz, 1H, β-H), 9.21 (d, *J* = 5.0 Hz, 1H, β-H), 8.98-8.96 (m, 2H, β-H), 8.93-8.83 (m, 7H, β-H), 8.75 (d, *J* = 5.0 Hz, 1H, β-H), 8.14 (d, *J* = 1.5 Hz, 2H, Ar-*o*-H), 7.94 (d, *J* = 1.5 Hz, 2H, Ar-*o*-H), 7.93 (d, *J* = 1.5 Hz, 2H, Ar-*o*-H), 7.76 (br, 1H, Ar-*p*-H), 7.74 (br, 2H, Ar-*p*-H), 7.32 (s, 2H, Ar-*m*-H), 7.28 (s, 2H, Ar-*m*-H), 2.61 (s, 3H, *p*-Me), 2.57 (s, 3H, *p*-Me), 2.05 (s, 6H, *o*-Me), 1.84 (s, 6H, *o*-Me), 1.52 (s, 18H, *t*-Bu), and 1.49 (s, 36H, *t*-Bu) ppm; UV/Vis (CH<sub>2</sub>Cl<sub>2</sub>): λ<sub>max</sub> (ε [M<sup>-1</sup>cm<sup>-1</sup>]) = 416 (272000), 532 (35200), and 592 (48700) nm; HR-MS (MALDI-TOF): *m/z* = 1532.6794, calcd for (C<sub>98</sub>H<sub>100</sub>N<sub>10</sub>Ni<sub>2</sub>)<sup>+</sup> = 1532.6834 ([*M*]<sup>+</sup>).

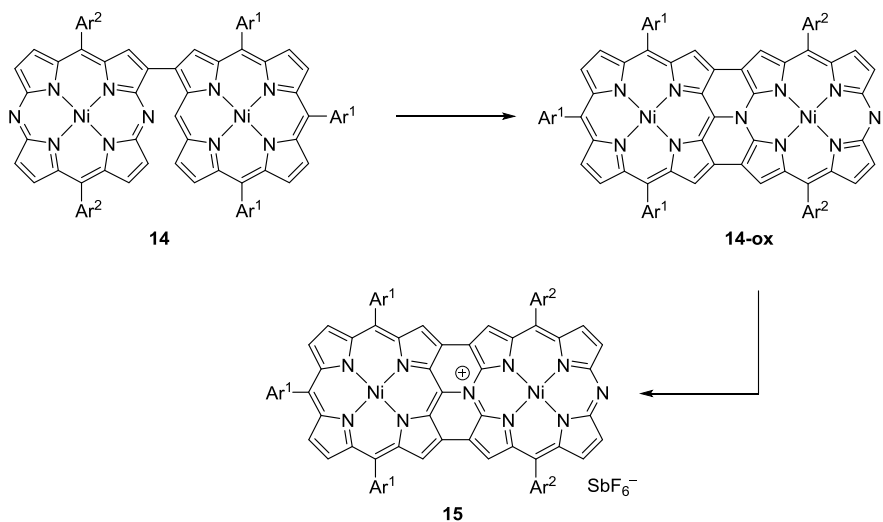

**Synthesis of 15:** To a solution of **14** (15.3 mg, 0.01 mmol, 1.0 equiv.) in degassed anhydrous CH<sub>2</sub>Cl<sub>2</sub> (10 mL) was added a solution of FeCl<sub>3</sub> (16.2 mg, 0.1 mmol, 10 equiv.) and DDQ (22.7 mg, 0.1 mmol, 10 equiv.) in nitromethane (1 mL). The reaction mixture was stirred at room temperature for 1 h and the reaction was quenched by addition of a saturated NaHCO<sub>3</sub> solution. The product was extracted with CH<sub>2</sub>Cl<sub>2</sub> and the organic extract was washed with water, and dried over anhydrous Na<sub>2</sub>SO<sub>4</sub>. After concentrating under reduced pressure, the residue was dissolved in CH<sub>2</sub>Cl<sub>2</sub> under N<sub>2</sub>, TBPA·SbF<sub>6</sub> (7.90 mg, 0.011 mmol, 1.1 equiv.) was added and the reaction mixture was further stirred for 1 h at room temperature. The reaction mixture was passed through a short Celite pad with CH<sub>2</sub>Cl<sub>2</sub> as an eluent. Recrystallization

from CH<sub>2</sub>Cl<sub>2</sub>/*n*-hexane afforded **15** (14 mg, 0.008 mmol, 80%). The single crystals of **15** suitable for X-ray diffraction experiments were grown from its PhCl/Octane solution.

**14-ox**: UV/Vis (CH<sub>2</sub>Cl<sub>2</sub>):  $\lambda_{\max}$  ( $\epsilon$  [M<sup>-1</sup>cm<sup>-1</sup>]) = 390 (64200), 444 (72700), 583 (153000), 783 (35300), 1000 (12800), 1200 (14500) nm; HR-MS (MALDI-TOF):  $m/z$  = 1530.6597, calcd for (C<sub>98</sub>H<sub>98</sub>N<sub>10</sub>Ni<sub>2</sub>)<sup>+</sup> = 1530.6677 ([M+H]<sup>+</sup>).

**15**: <sup>1</sup>H NMR (500 MHz, CDCl<sub>3</sub>, 213 K):  $\delta$  = 7.84 (br, 2H,  $\beta$ -H), 7.55-7.32 (m, 15H, Ar and  $\beta$ -H), 7.06 (s, 4H, Ar-*m*-H), 6.74 (br, 2H,  $\beta$ -H), 6.70 (br, 2H,  $\beta$ -H), 2.43 (s, 6H, *p*-Me), 1.91 (s, 12H, *o*-Me), 1.36 (s, 36H, *t*-Bu), and 1.31 (s, 18H, *t*-Bu) ppm (signals are very broad and difficult to assign); UV/Vis (CH<sub>2</sub>Cl<sub>2</sub>):  $\lambda_{\max}$  ( $\epsilon$  [M<sup>-1</sup>cm<sup>-1</sup>]) = 381 (61700), 444 (65400), 563 (61800), 766 (14900), 834 (15800), and 974 (36500) nm; HR-MS (MALDI-TOF):  $m/z$  = 1529.6697, calcd for (C<sub>98</sub>H<sub>97</sub>N<sub>10</sub>Ni<sub>2</sub>)<sup>+</sup> = 1529.6599 ([M-SbF<sub>6</sub>]<sup>+</sup>).

### 3. NMR and EPR Spectra

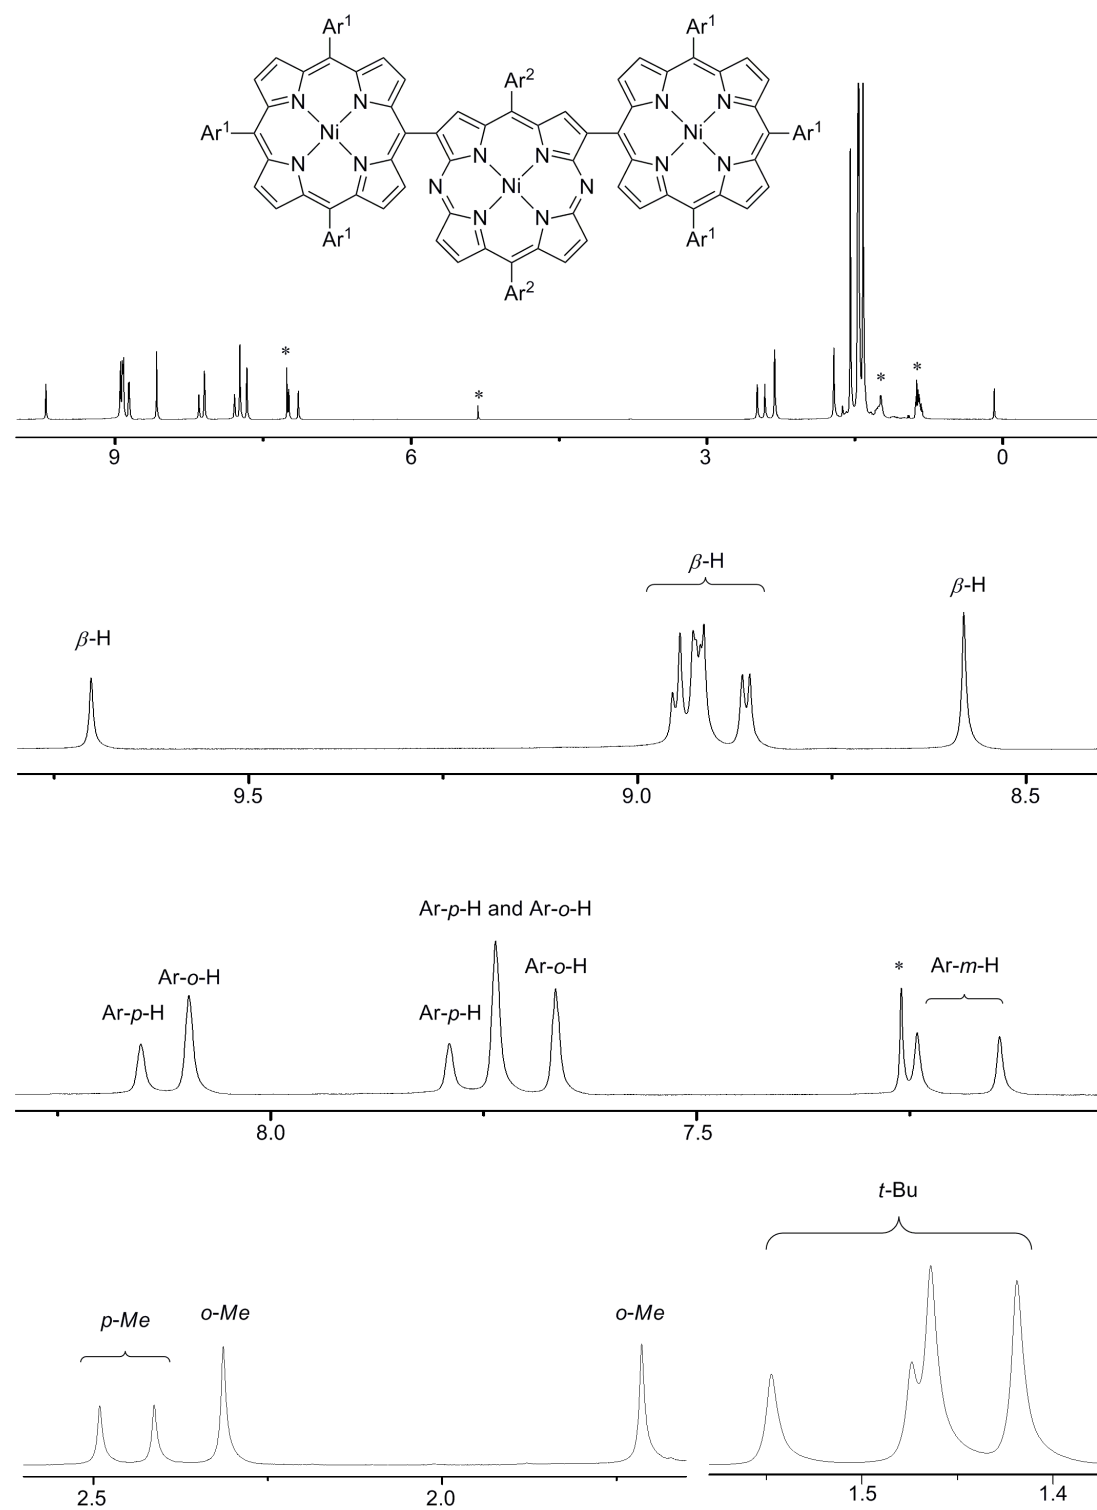

**Figure S1-1.**  $^1\text{H}$  NMR spectrum of **3a** in  $\text{CDCl}_3$  at 233 K.

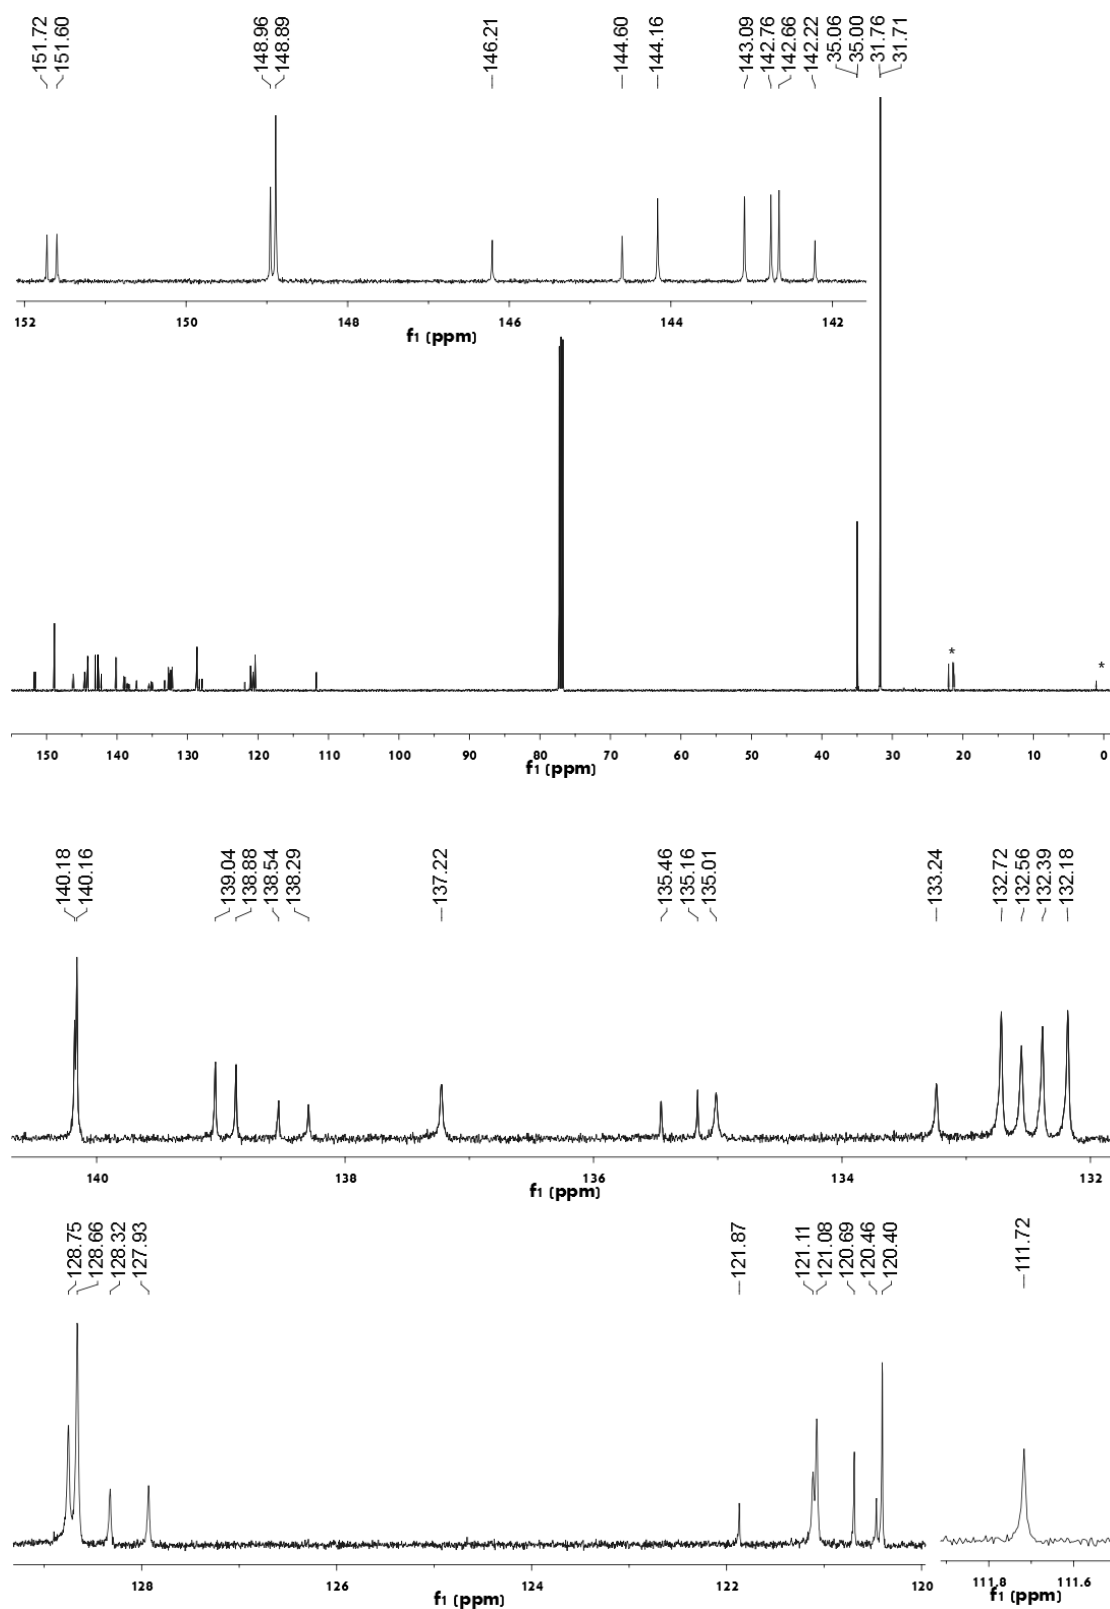

**Figure S1-2.**  $^{13}\text{C}$  NMR spectrum of **3a** in  $\text{CDCl}_3$  at 298 K.

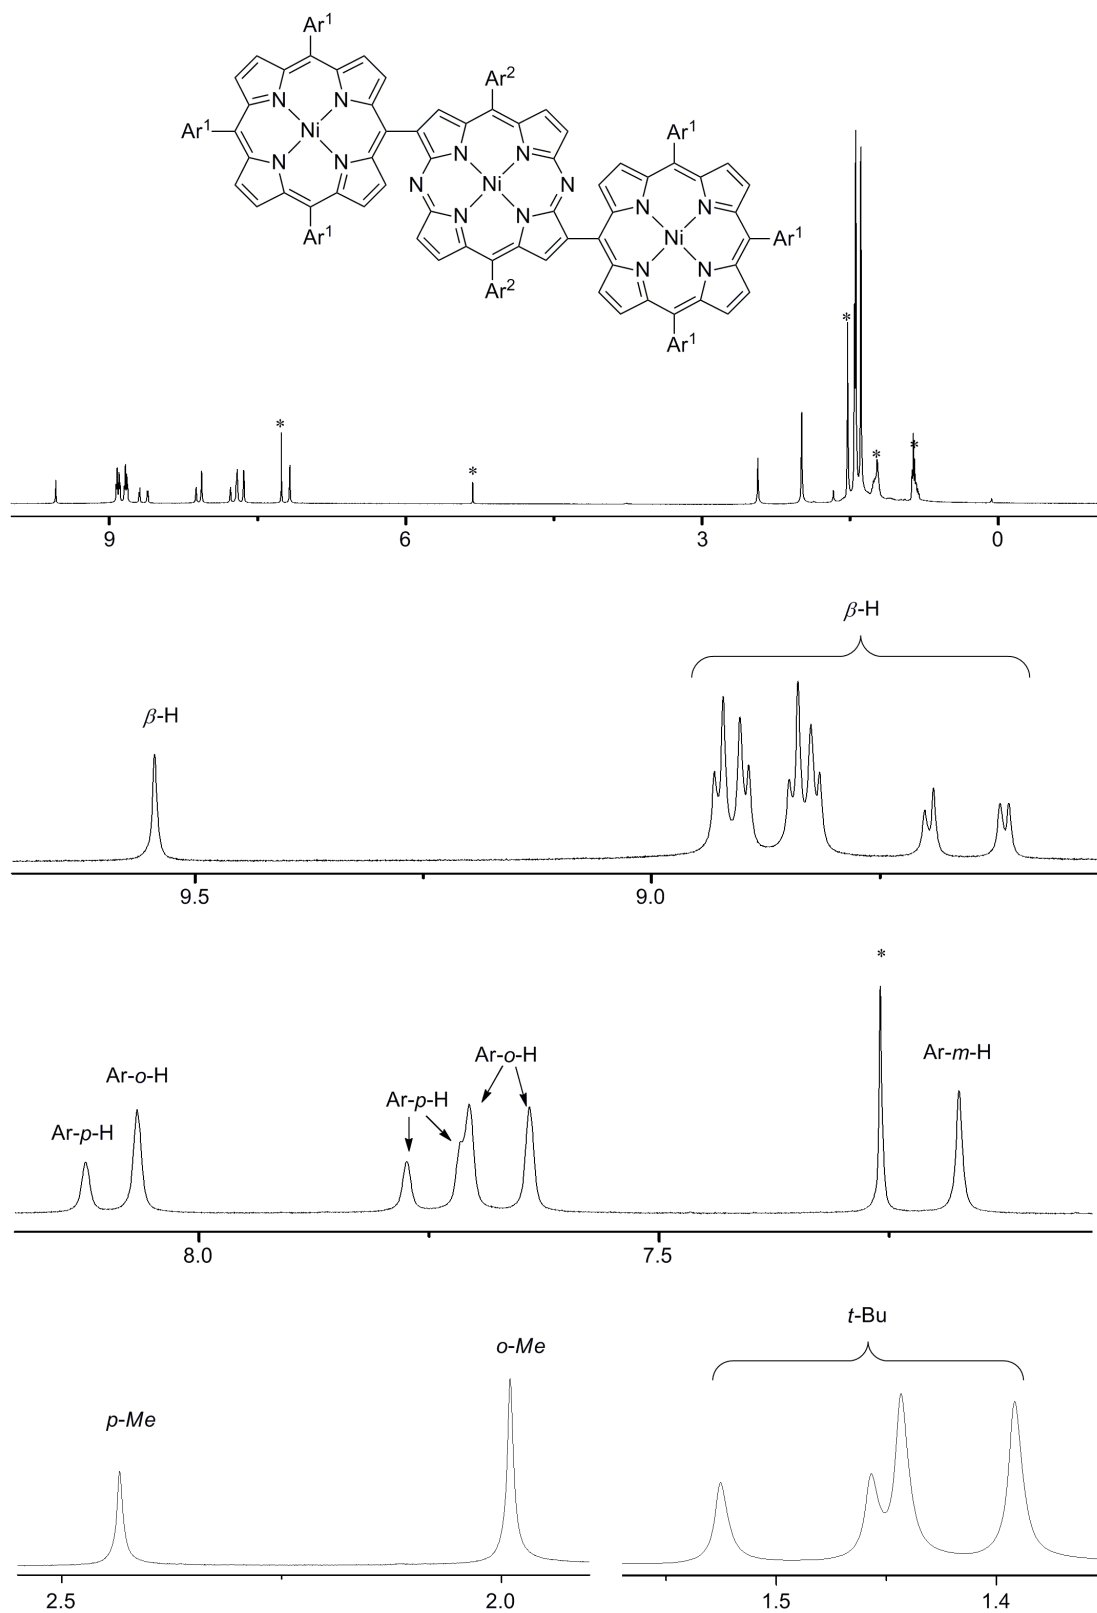

**Figure S1-3.** <sup>1</sup>H NMR spectrum of **3b** in CDCl<sub>3</sub> at 233 K.

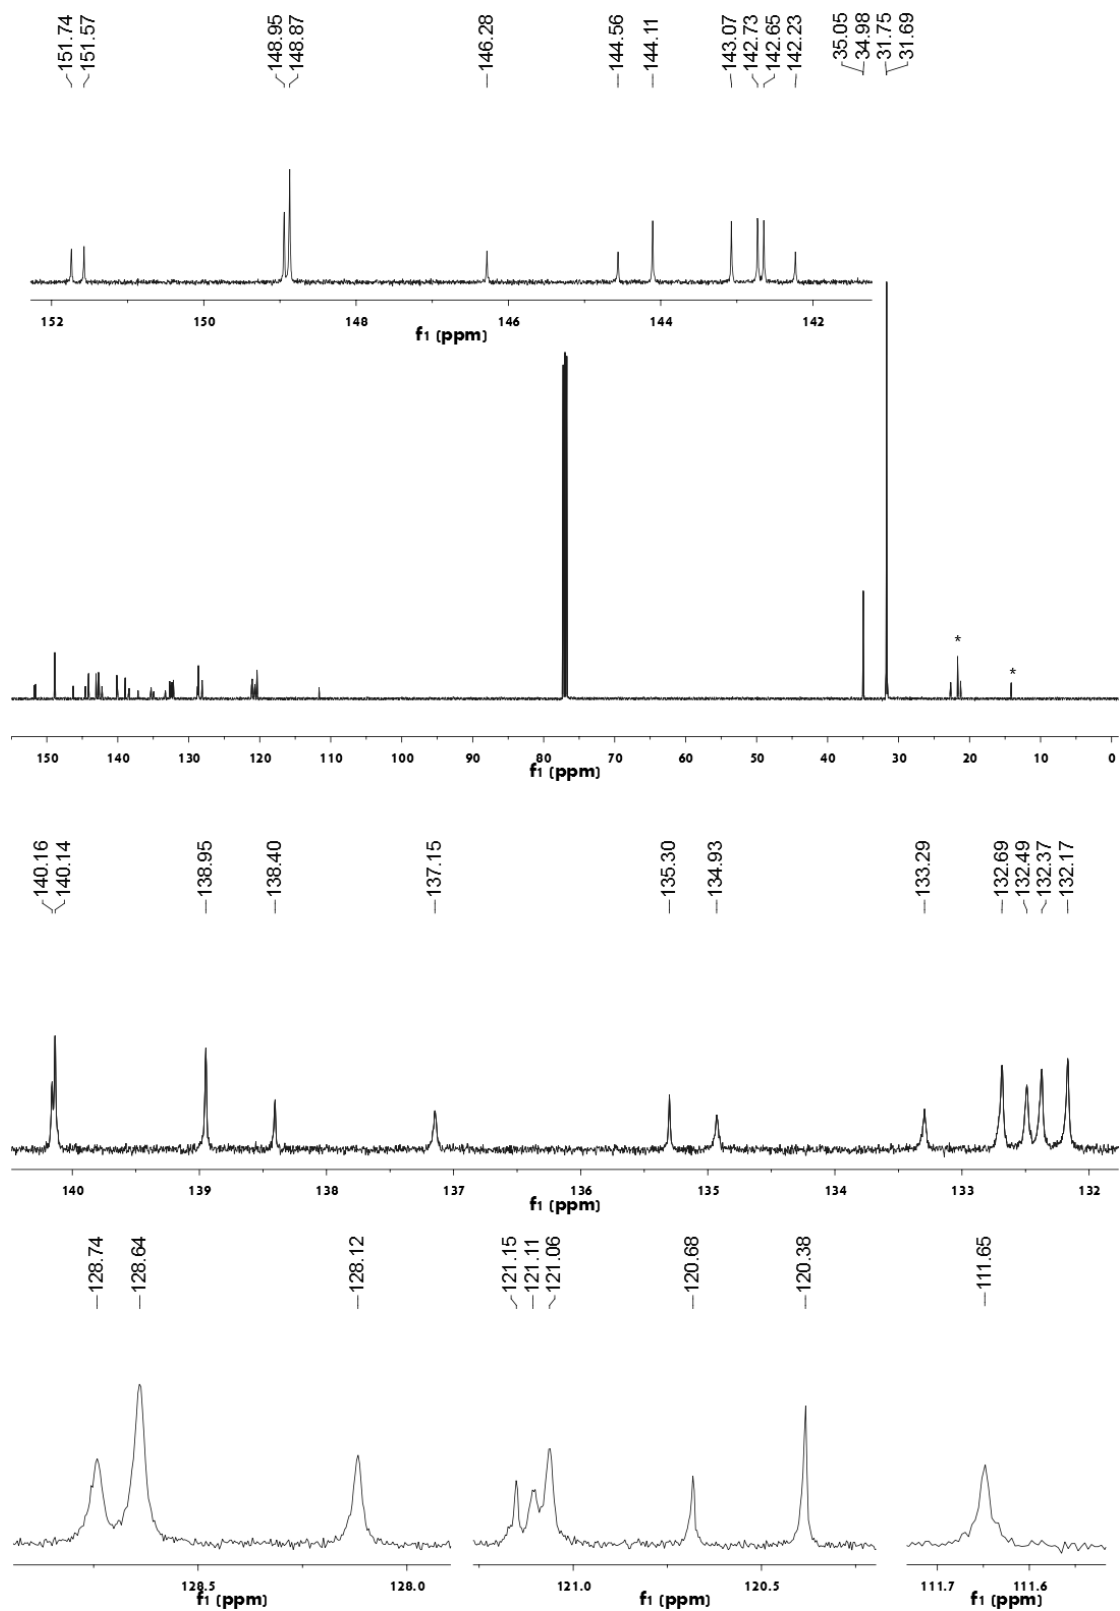

**Figure S1-4.**  $^{13}\text{C}$  NMR spectrum of **3b** in  $\text{CDCl}_3$  at 298 K.



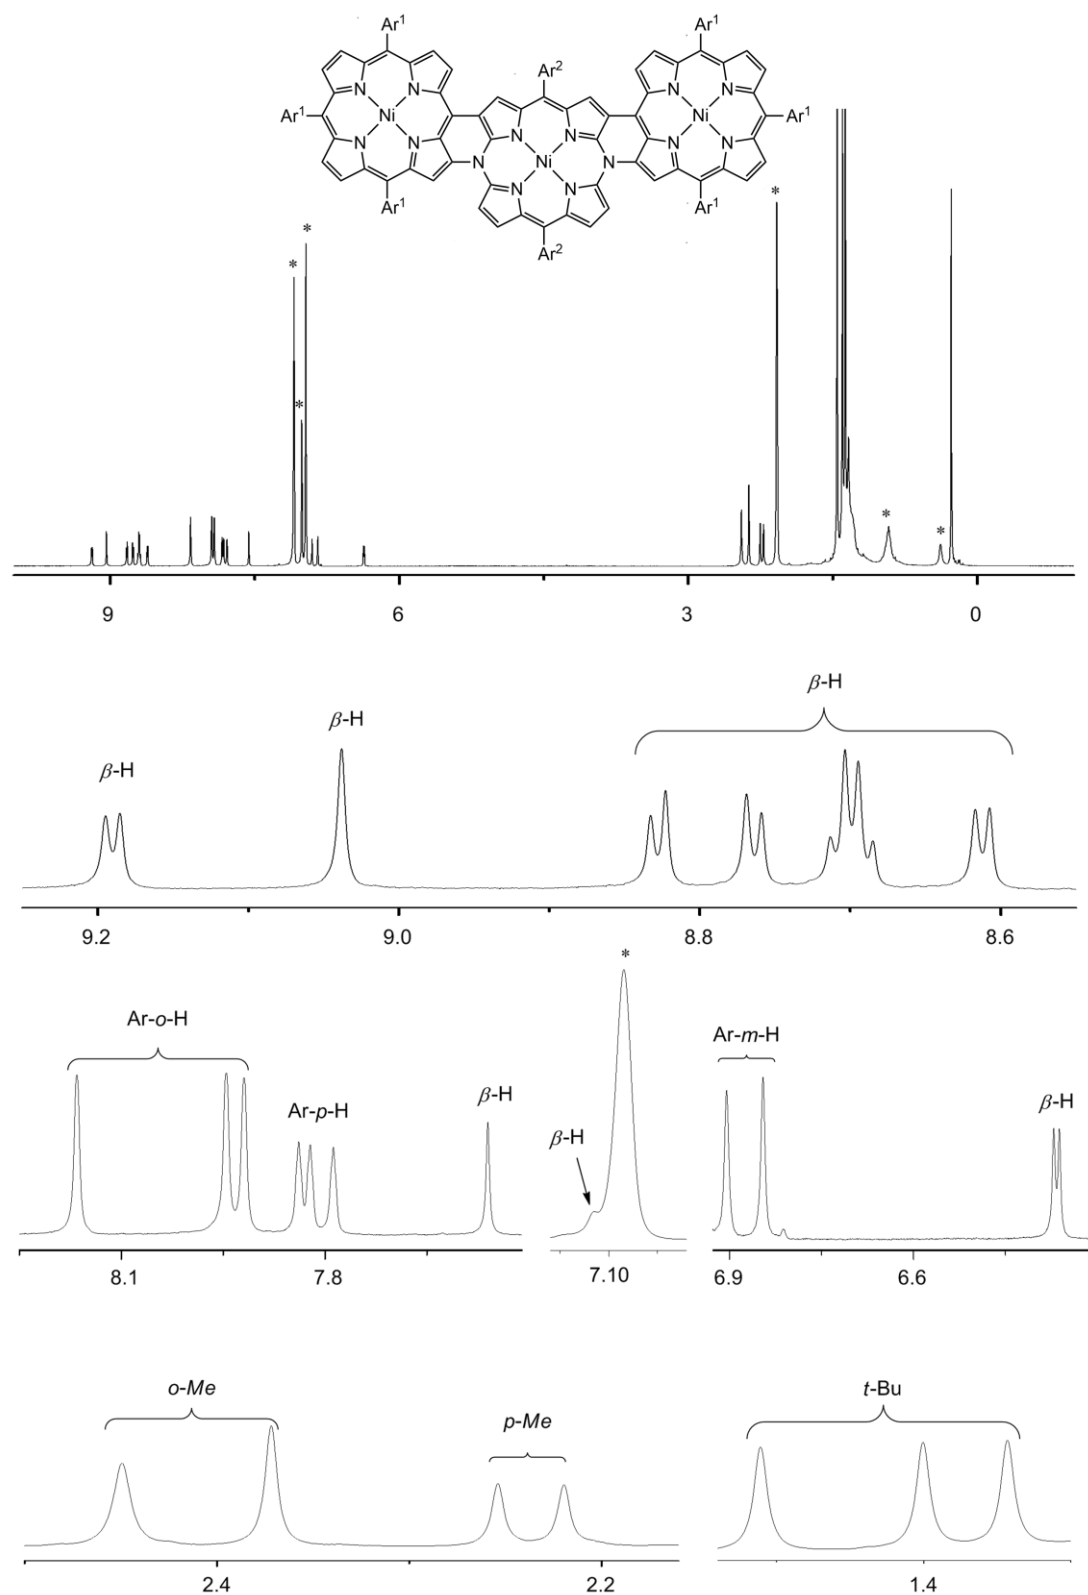

**Figure S1-5.**  $^1\text{H}$  NMR spectrum of **4a** in  $\text{Toluene-}d_8$  at 298 K.

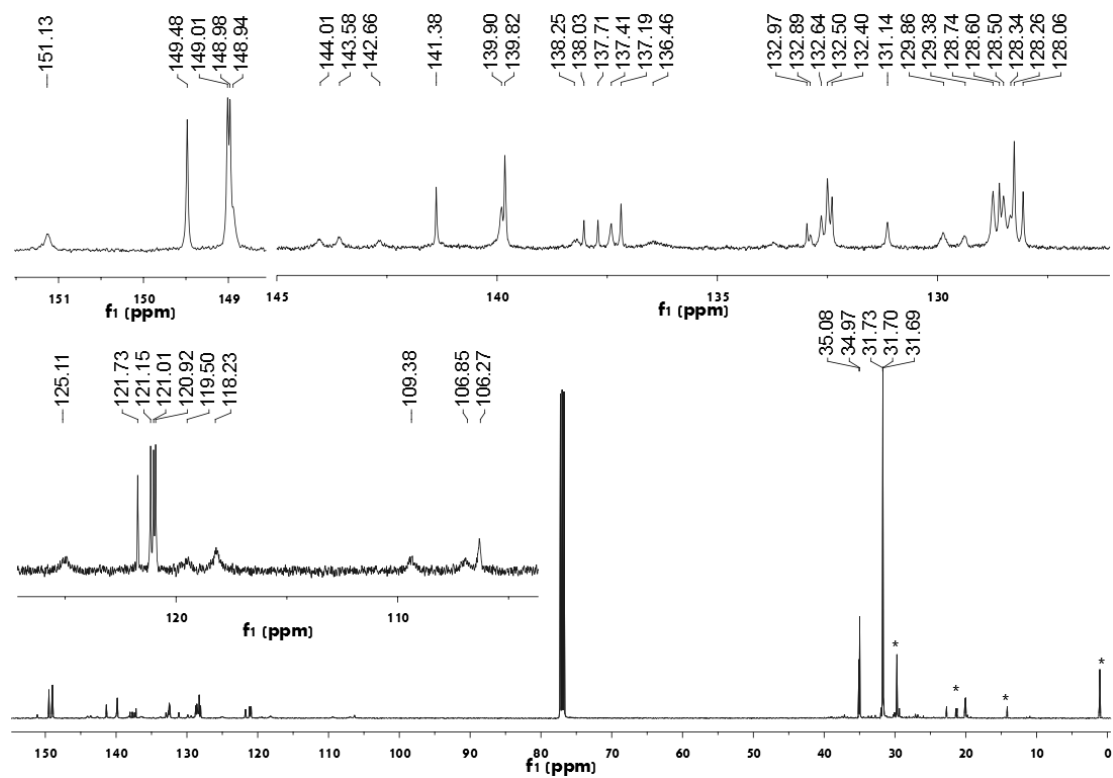

**Figure S1-6.**  $^{13}\text{C}$  NMR spectrum of **4a** in  $\text{CDCl}_3$ .

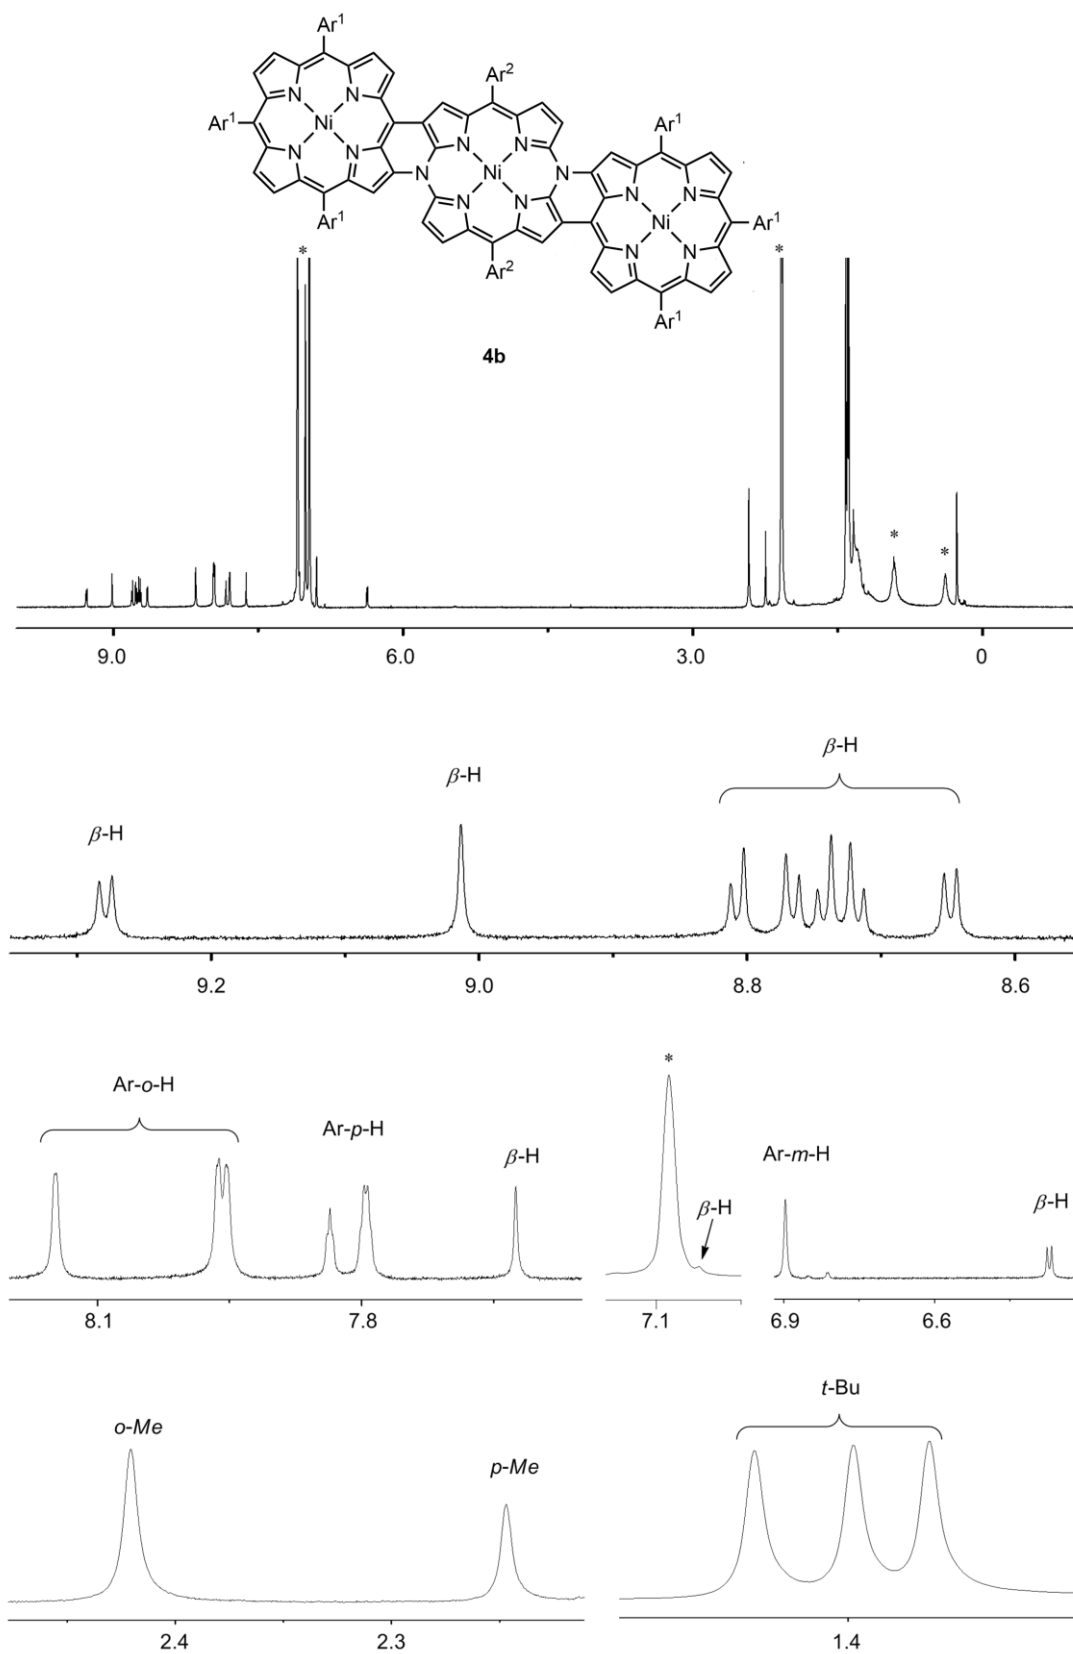

**Figure S1-7.** <sup>1</sup>H NMR spectrum of **4b** in Toluene-*d*<sub>8</sub> at 298 K.

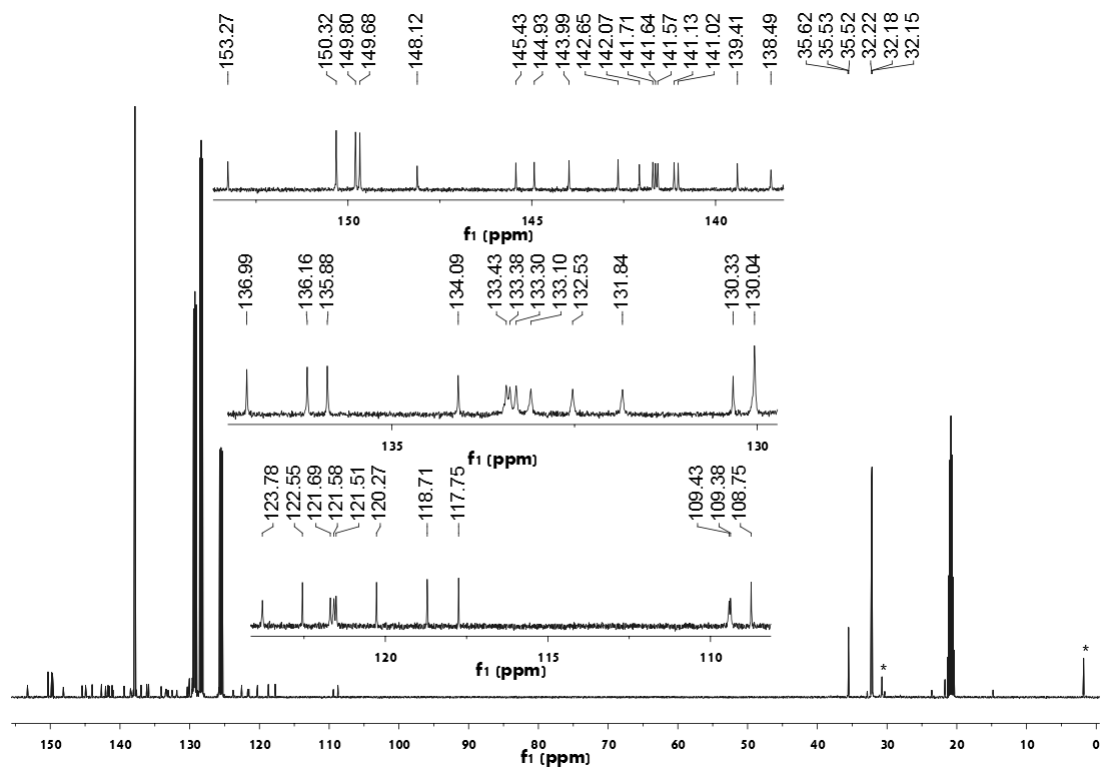

Figure S1-8.  $^{13}\text{C}$  NMR spectrum of **4b** in toluene- $d_8$ .

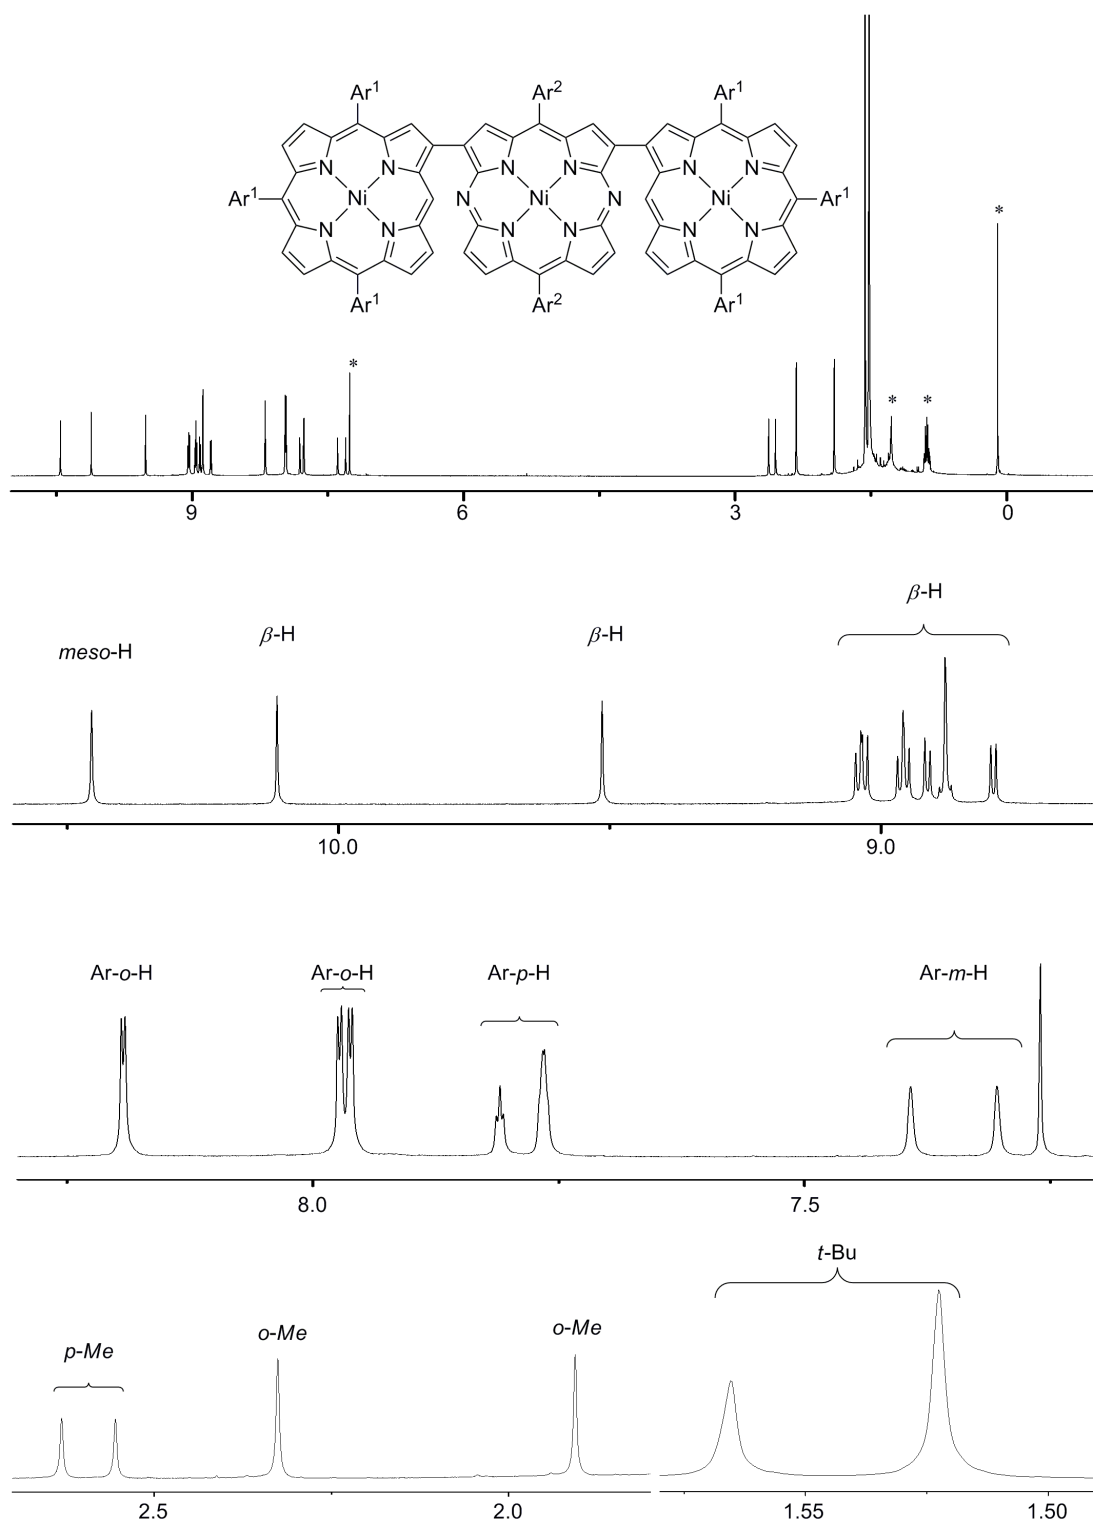

**Figure S1-9.**  $^1\text{H}$  NMR spectrum of **5a** in  $\text{CDCl}_3$  at 298 K.

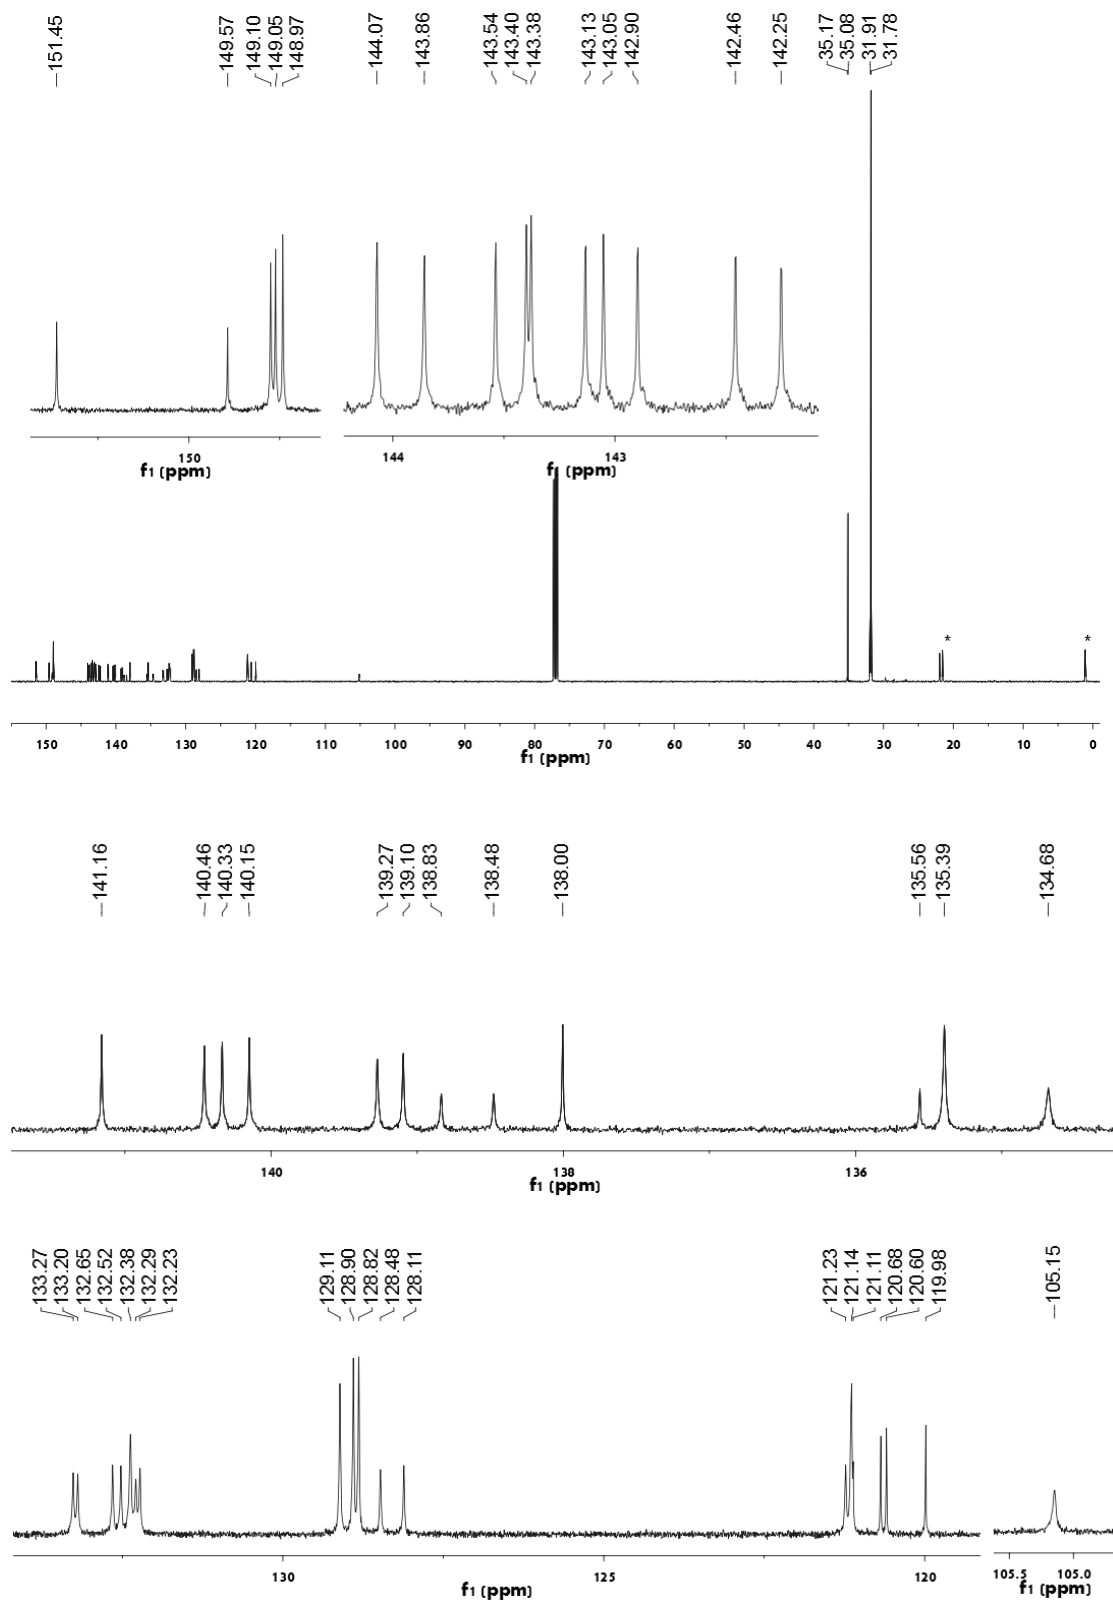

**Figure S1-10.**  $^{13}\text{C}$  NMR spectrum of **5a** in  $\text{CDCl}_3$  at 298 K.

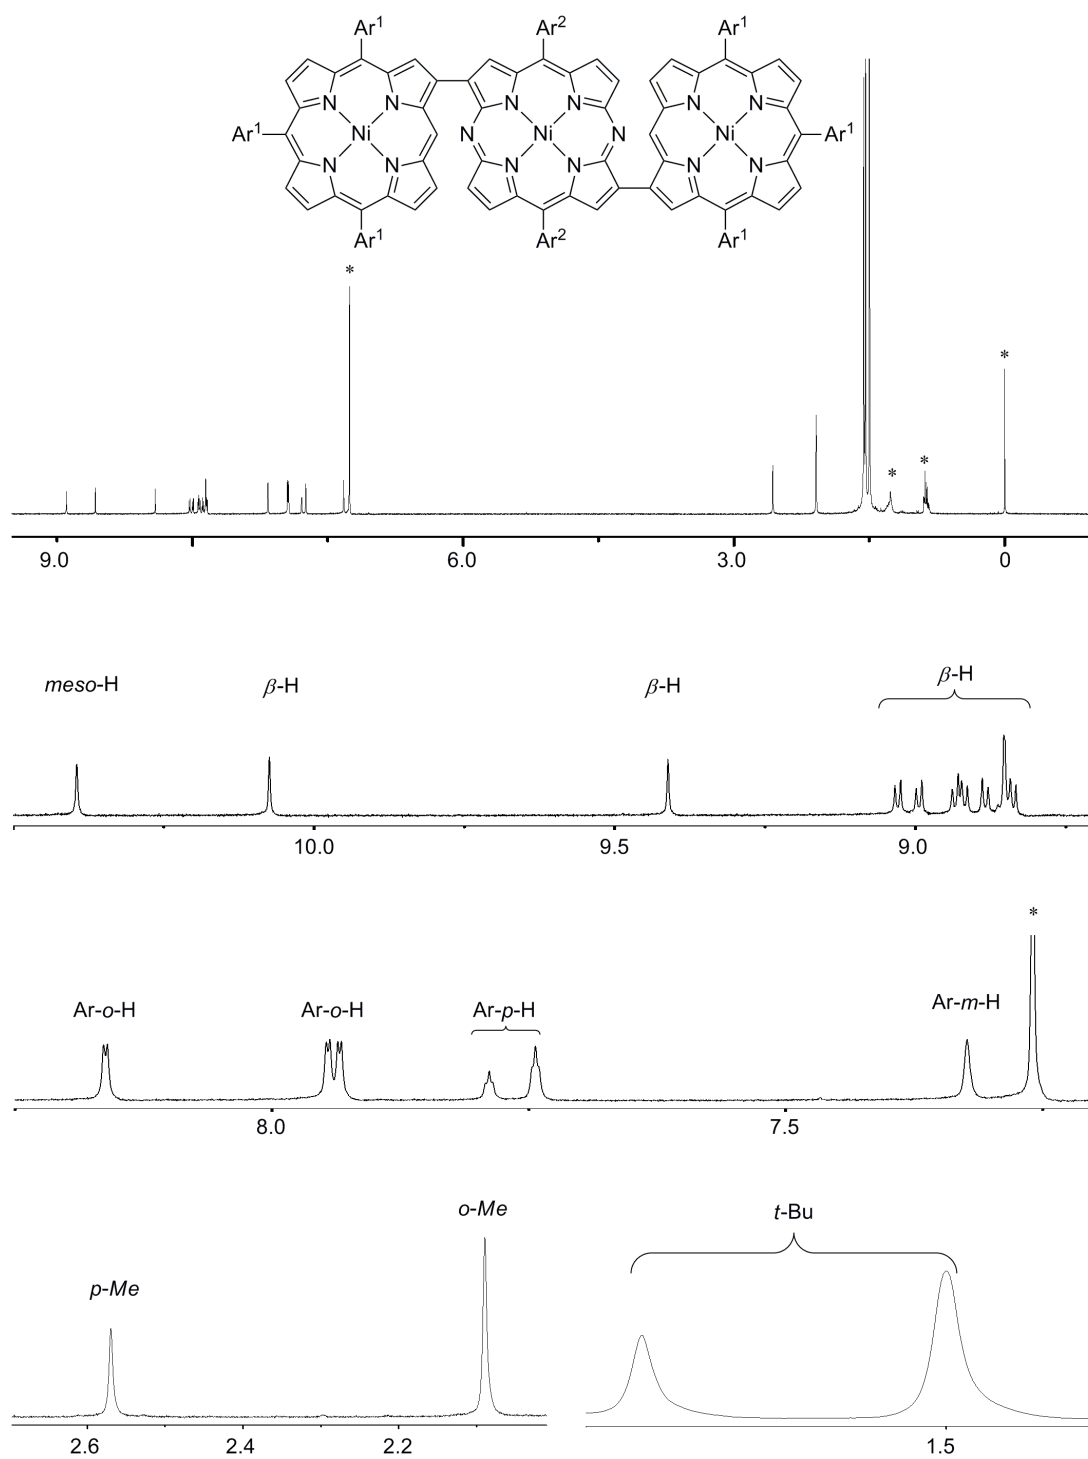

**Figure S1-11.** <sup>1</sup>H NMR spectrum of **5b** in CDCl<sub>3</sub> at 298 K.

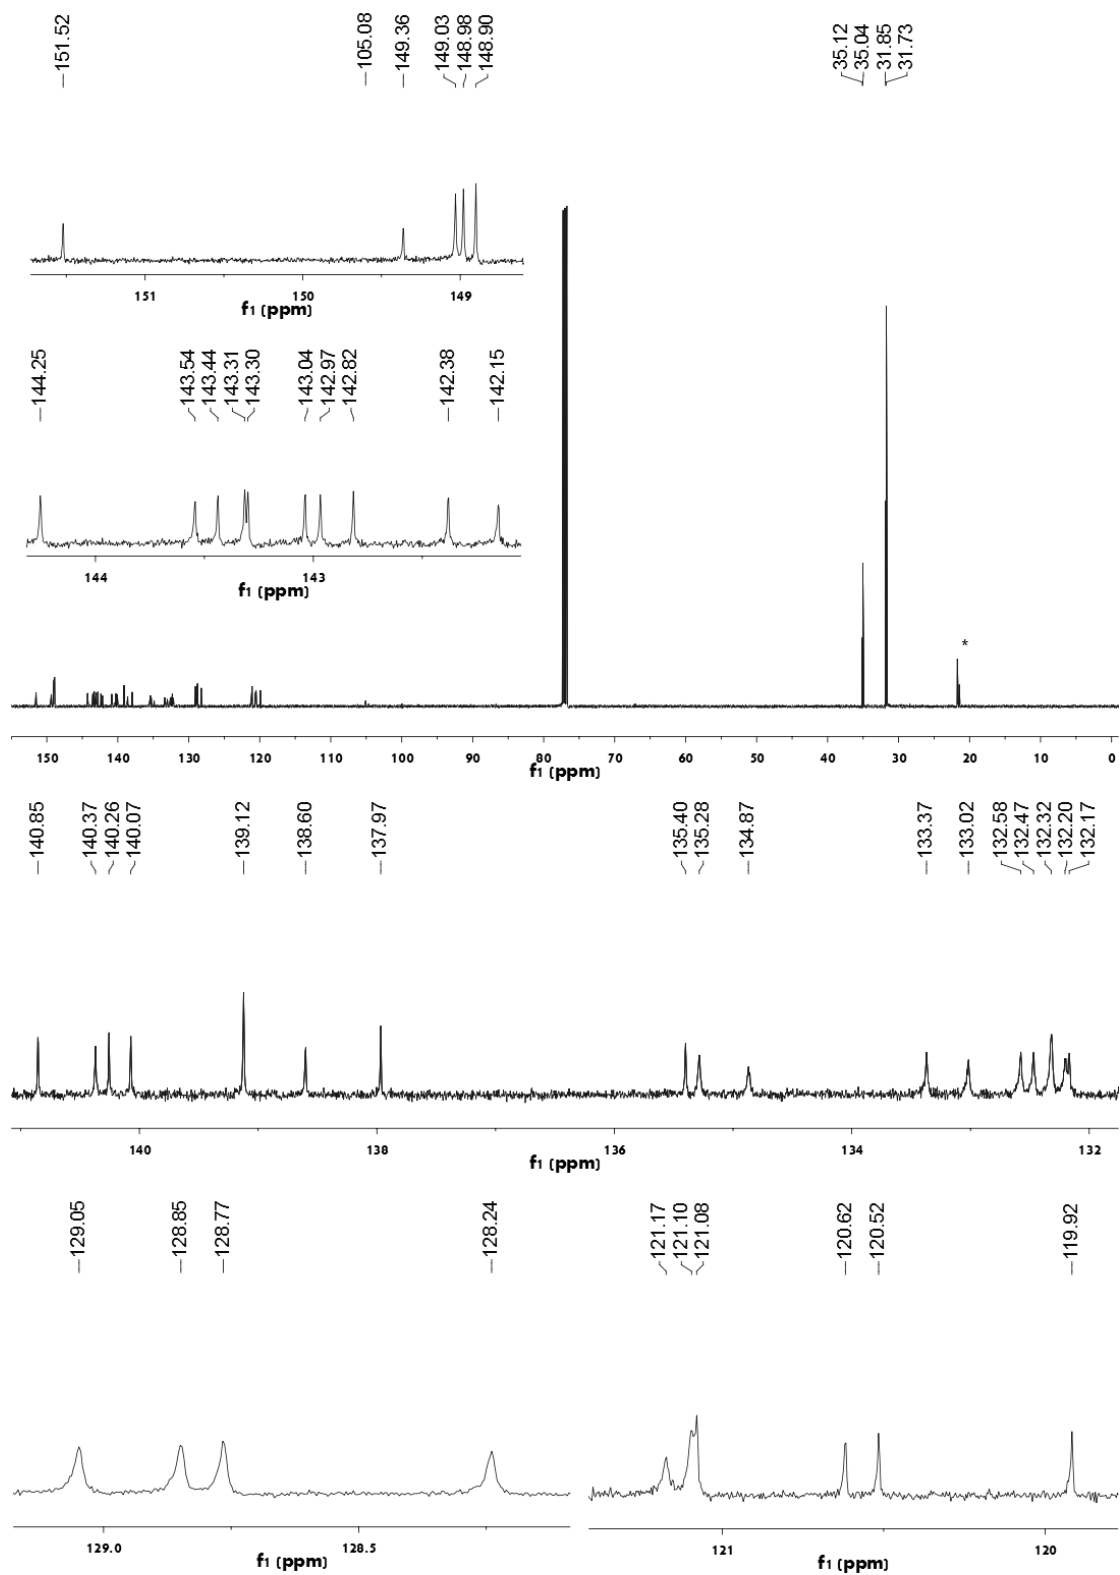

Figure S1-12.  $^{13}\text{C}$  NMR spectrum of **5b** in  $\text{CDCl}_3$  at 298 K.



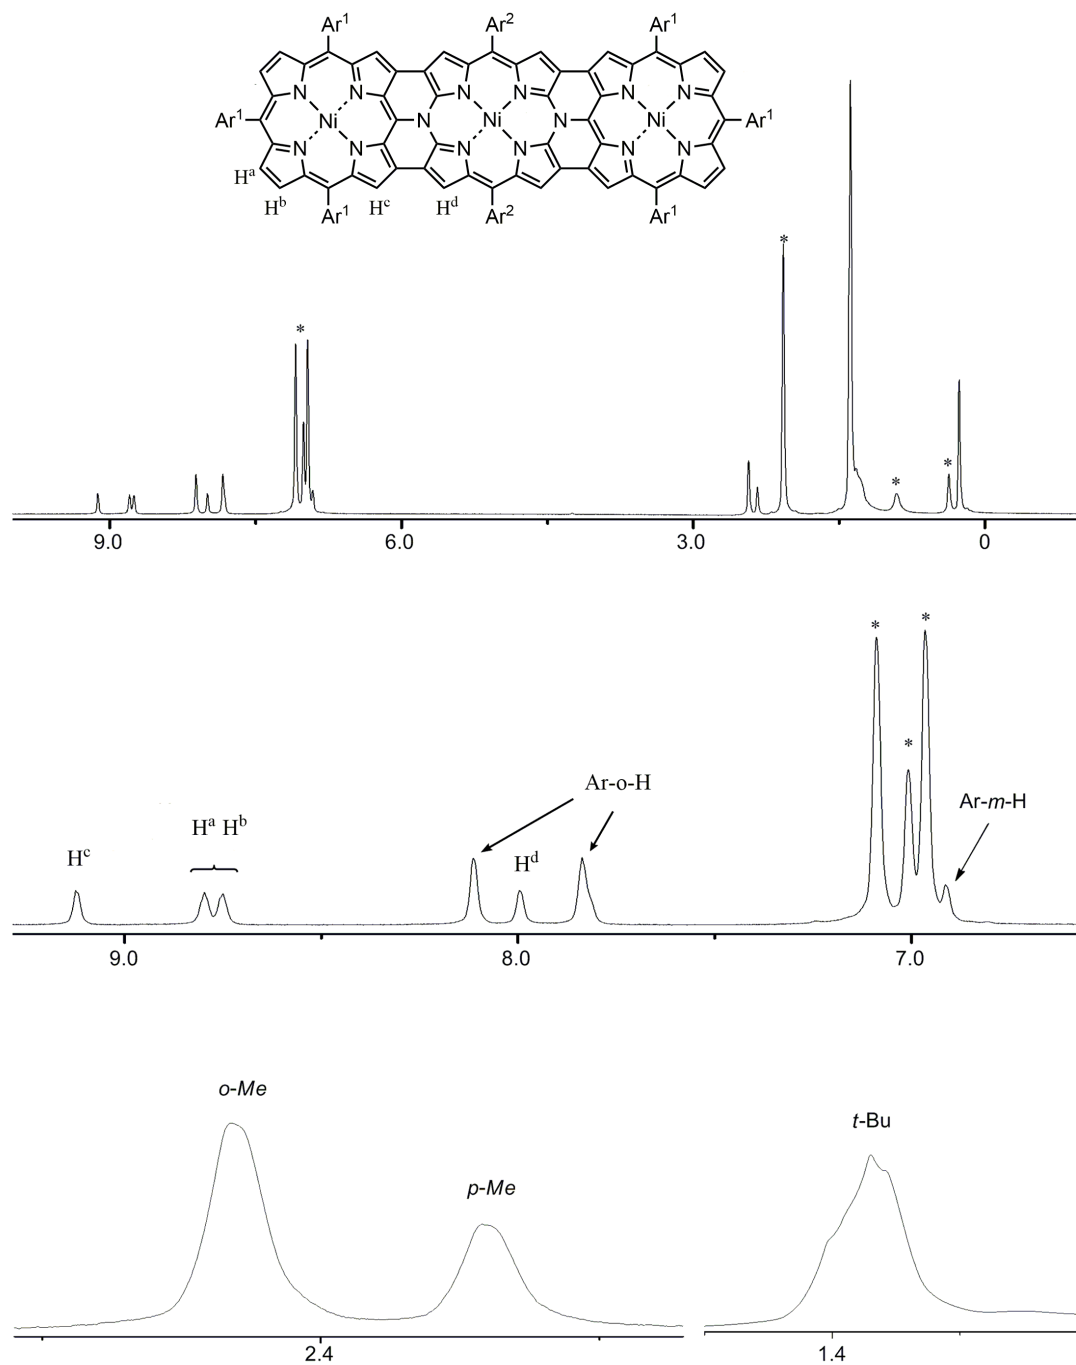

**Figure S1-13.**  $^1\text{H}$  NMR spectrum of **6** in  $\text{toluene-}d_8$  at 298 K.

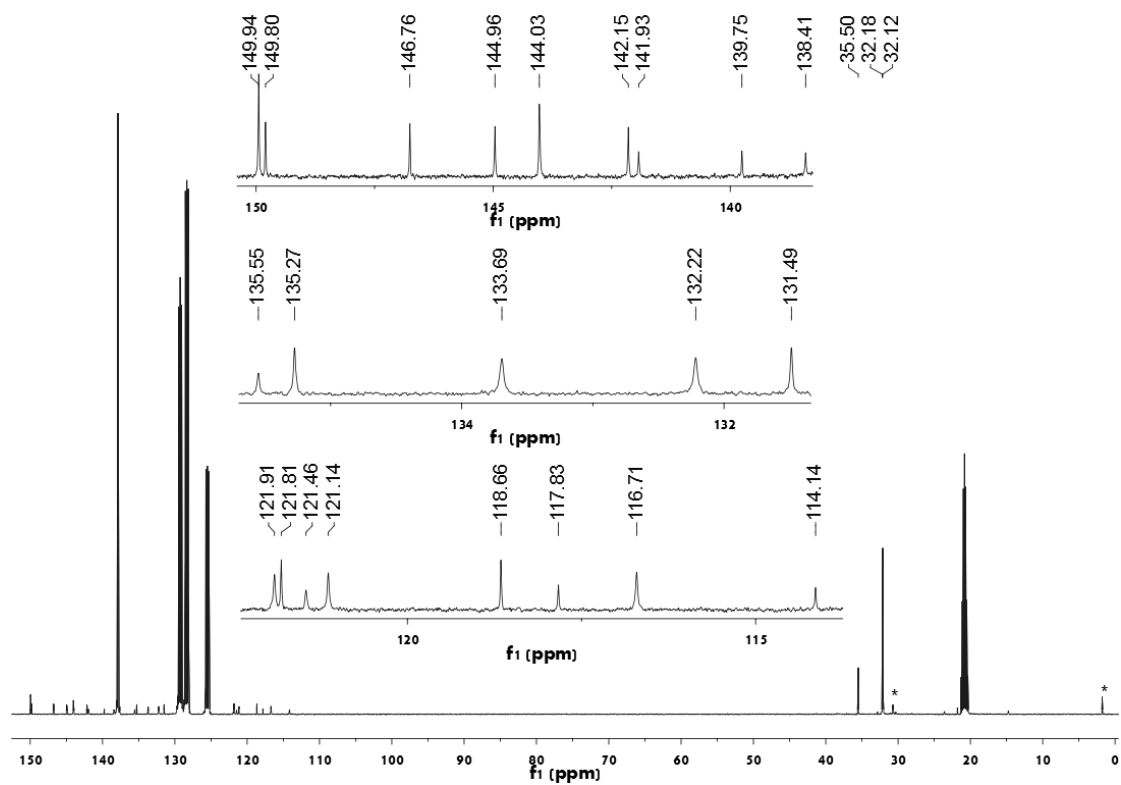

**Figure S1-14.**  $^{13}\text{C}$  NMR spectrum of **6** in toluene- $d_8$ .

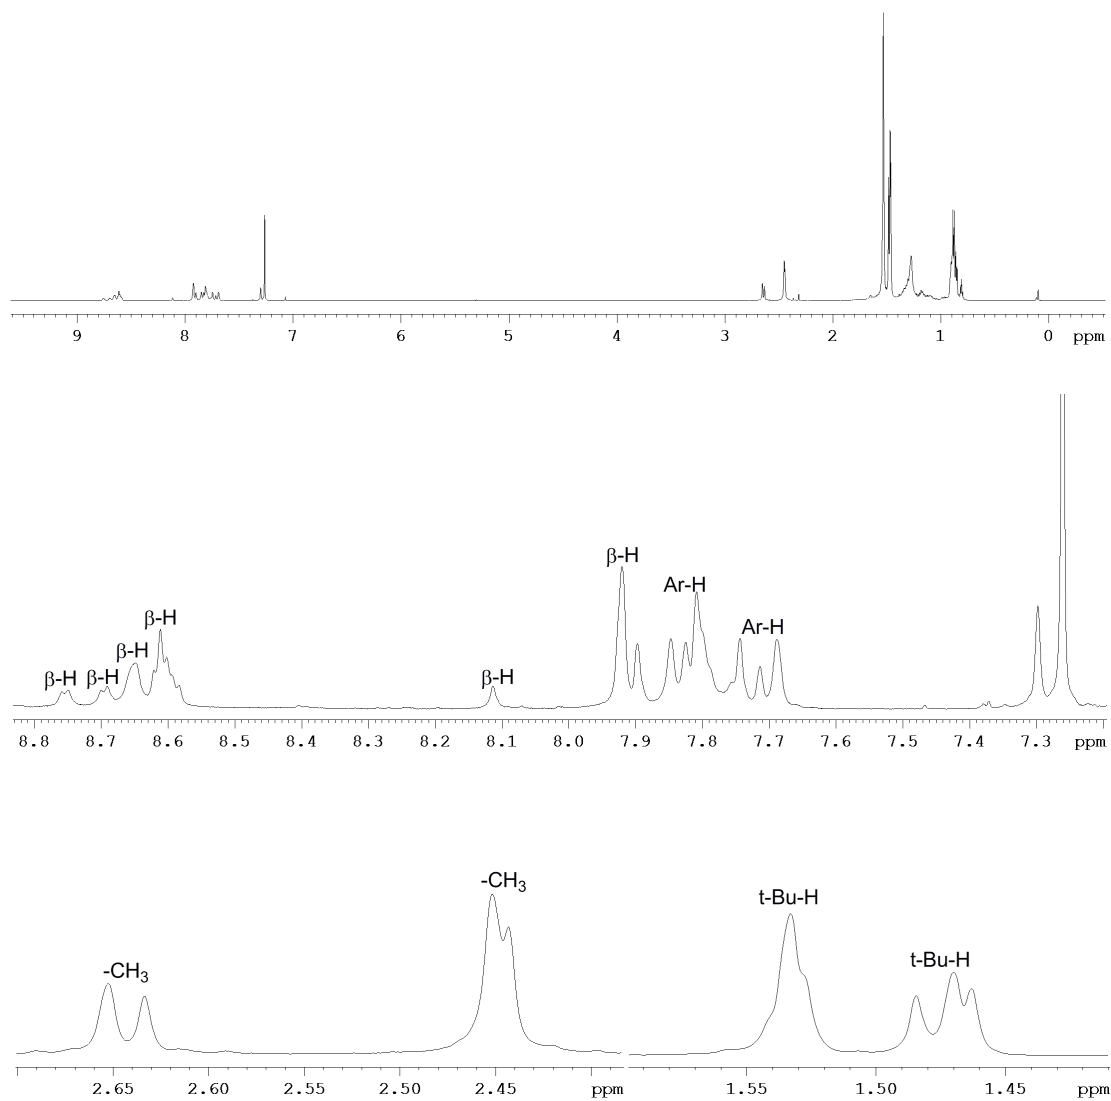

**Figure S1-15.**  $^1\text{H}$  NMR spectrum of **6-Cl** in  $\text{CDCl}_3$  at 298 K.

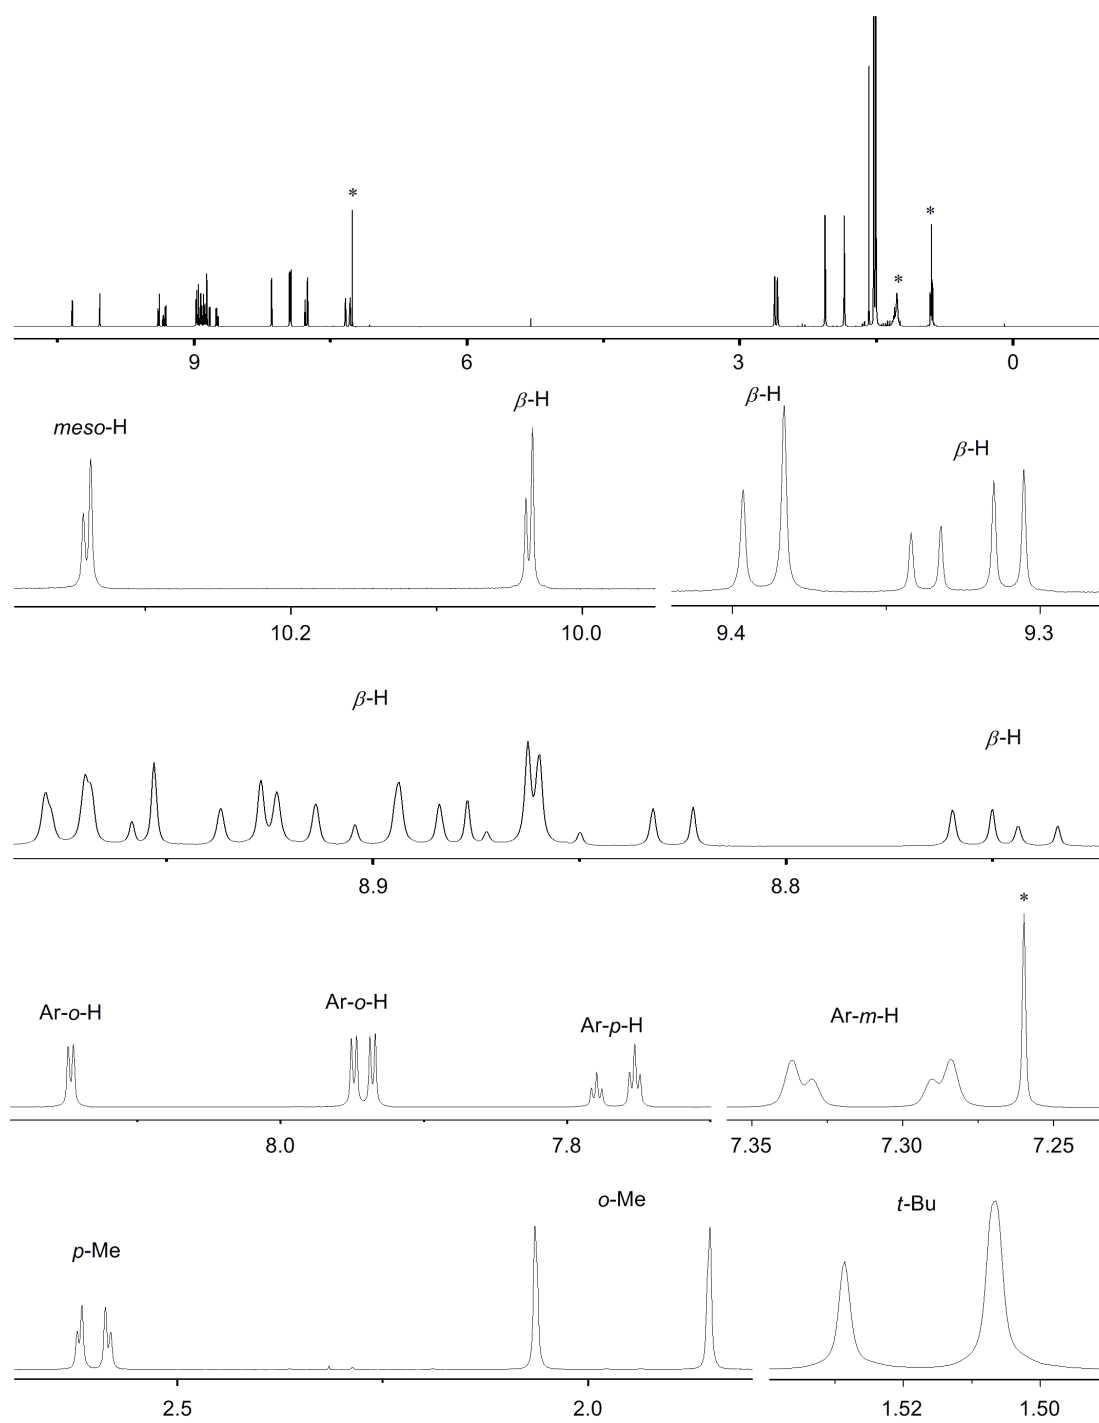

**Figure S1-16.**  $^1\text{H}$  NMR spectrum of **7** in  $\text{CDCl}_3$  at 298 K.

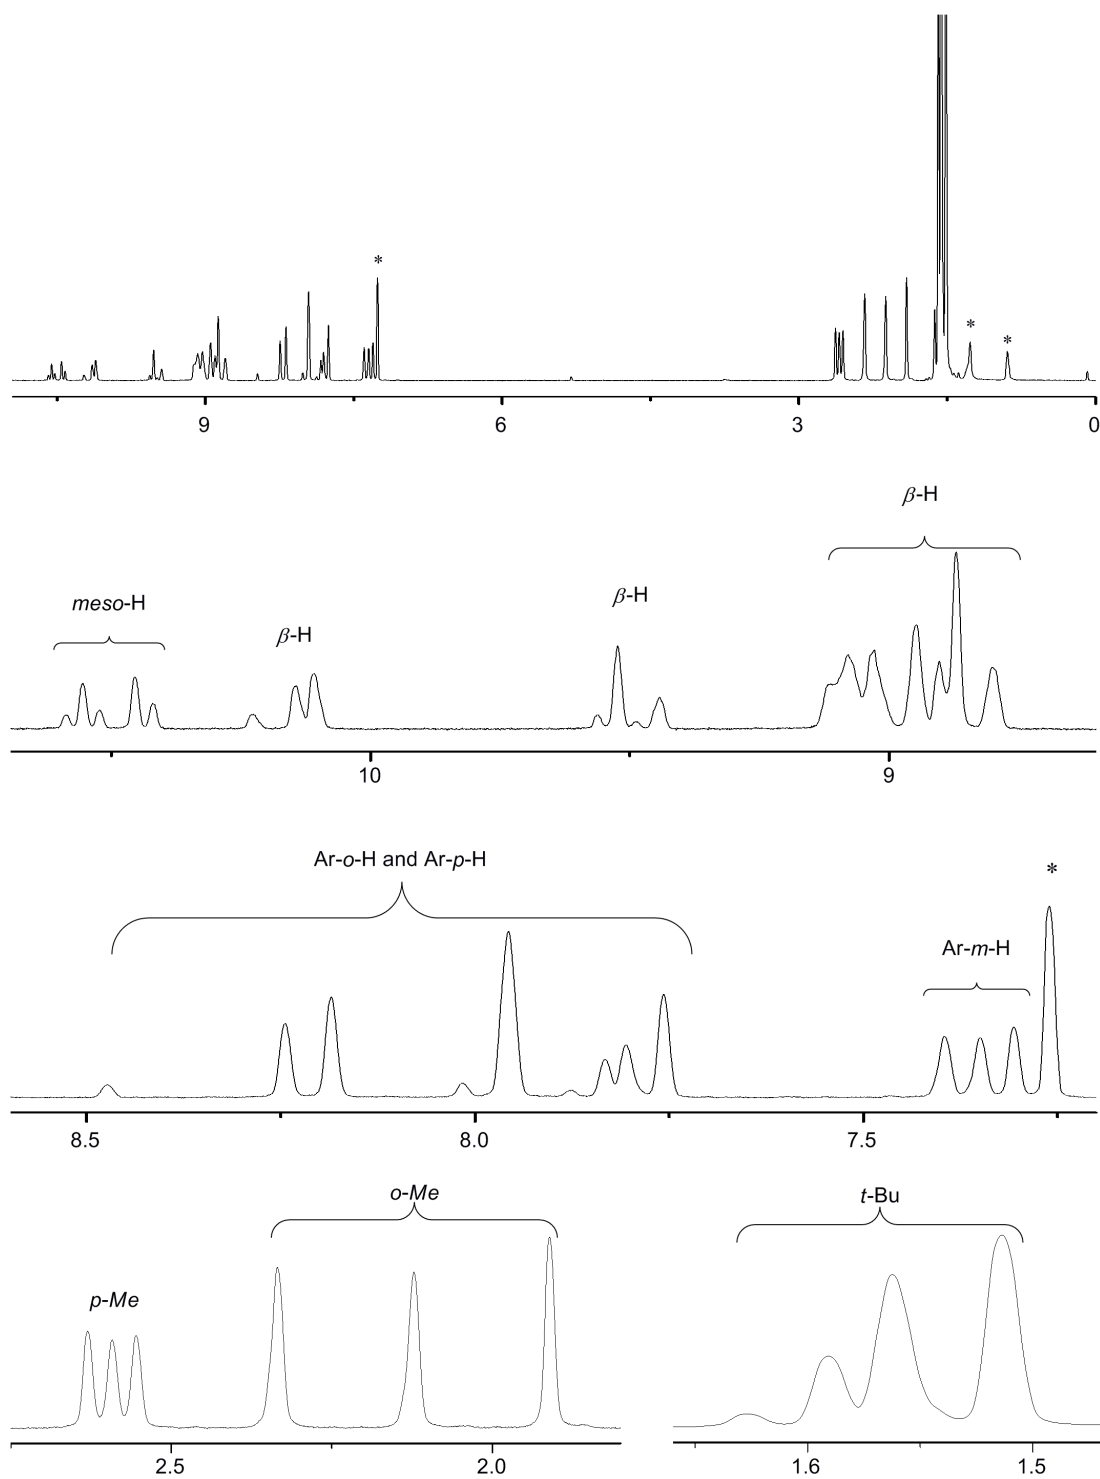

**Figure S1-17.**  $^1\text{H}$  NMR spectrum of **9** in  $\text{CDCl}_3$  at 298 K.

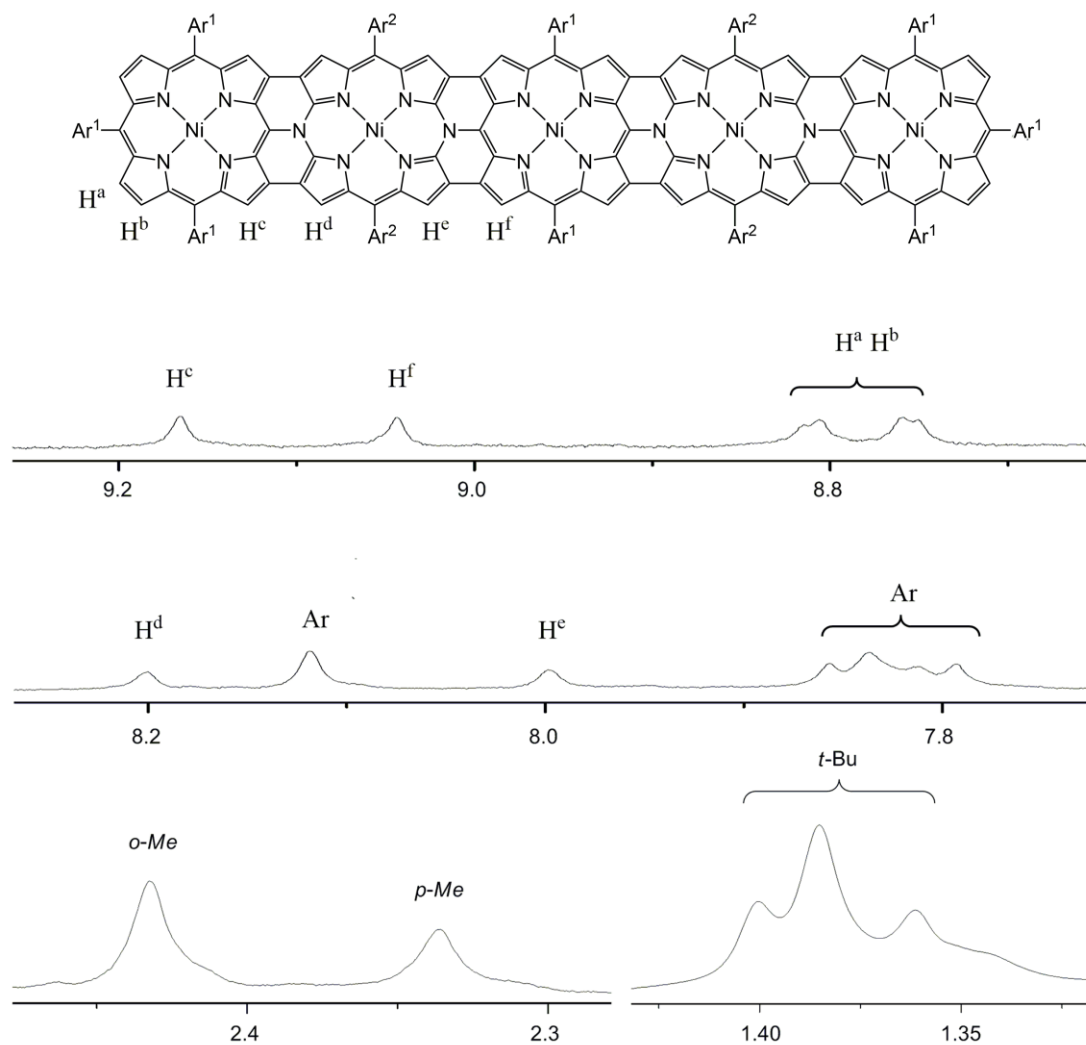

**Figure S1-18.**  $^1\text{H}$  NMR spectrum of **10** in toluene- $d_8$  at 298 K.

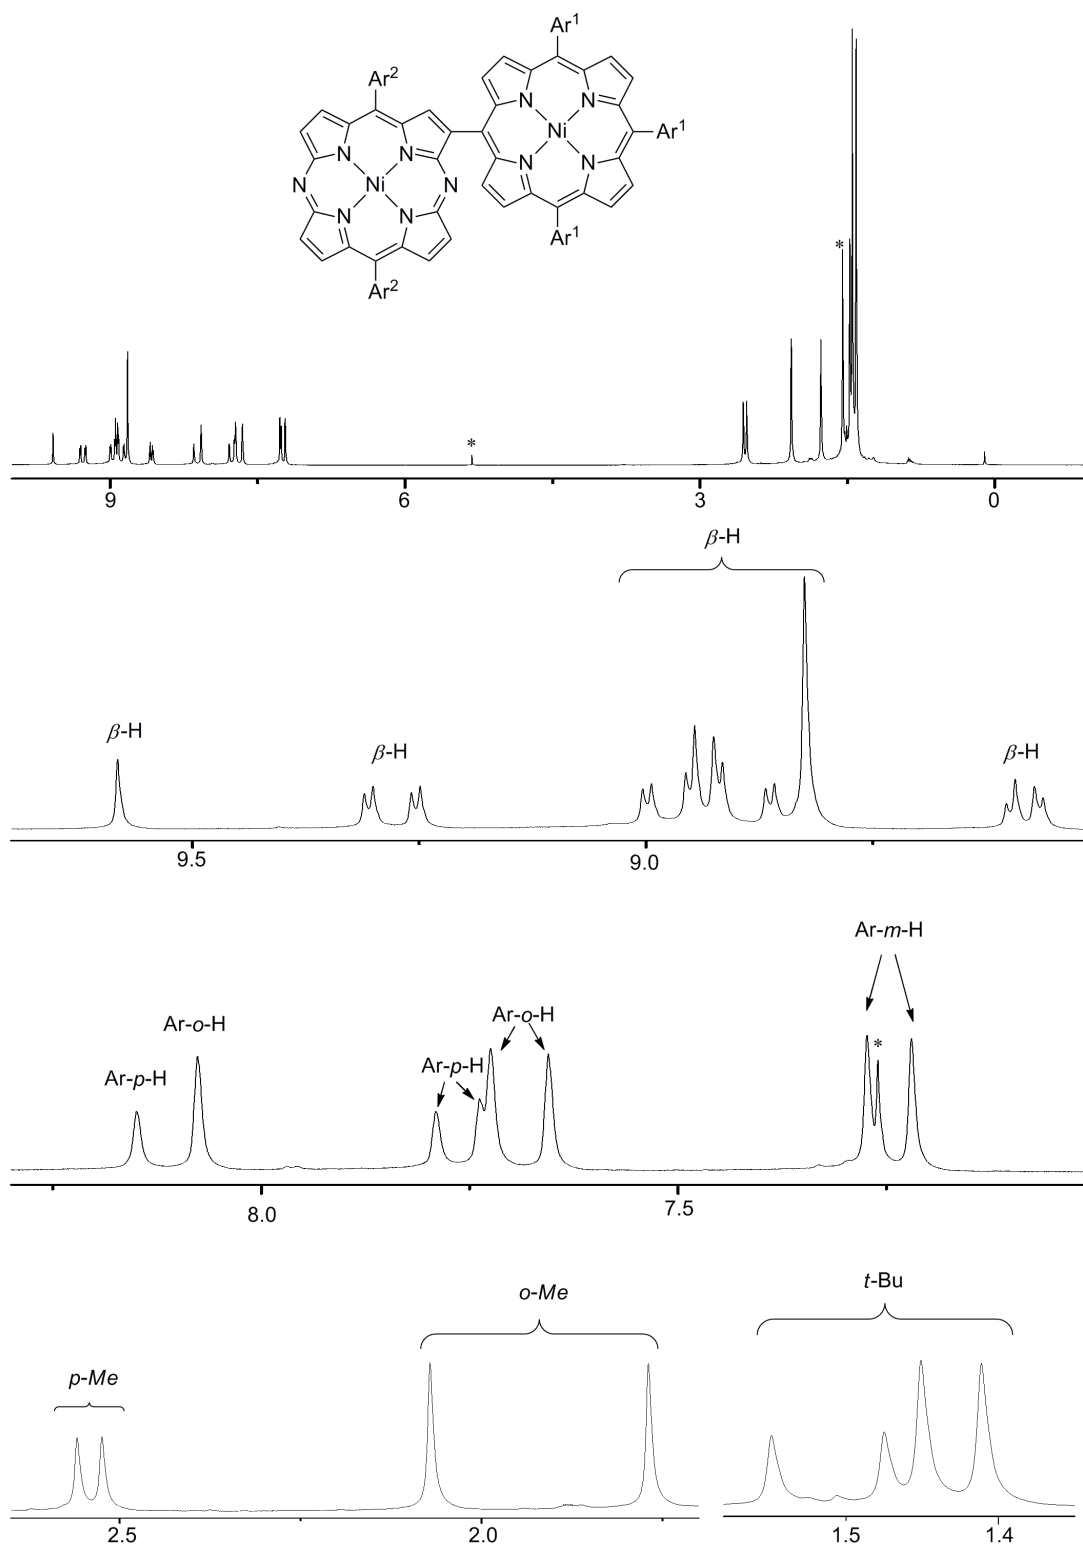

**Figure S1-19.**  $^1\text{H}$  NMR spectrum of **12** in  $\text{CDCl}_3$  at 233 K.

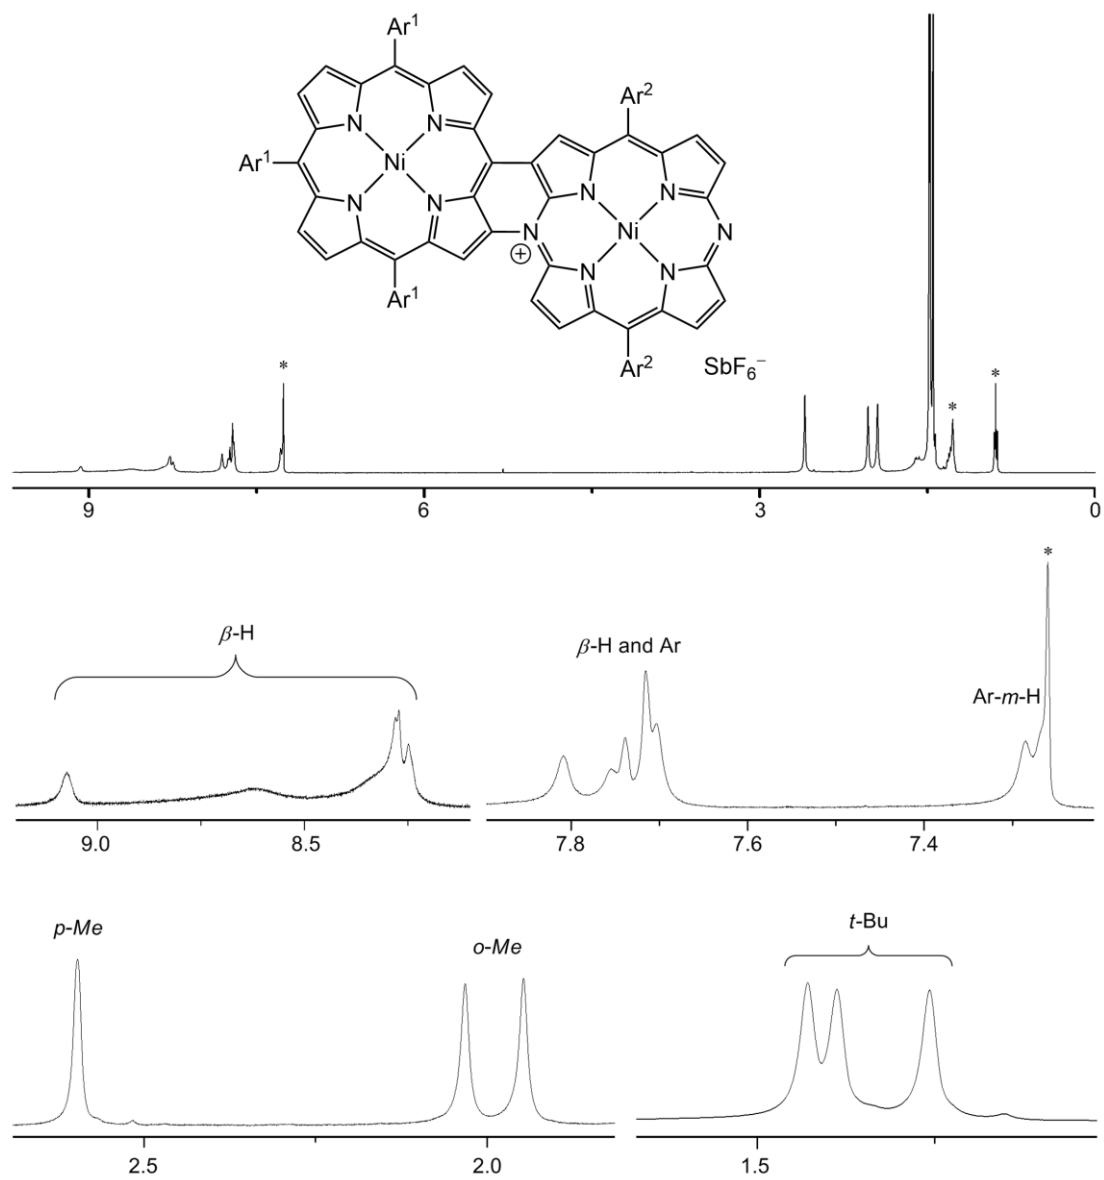

**Figure S1-20.**  $^1\text{H}$  NMR spectrum of **13** in  $\text{CDCl}_3$  at 298 K.



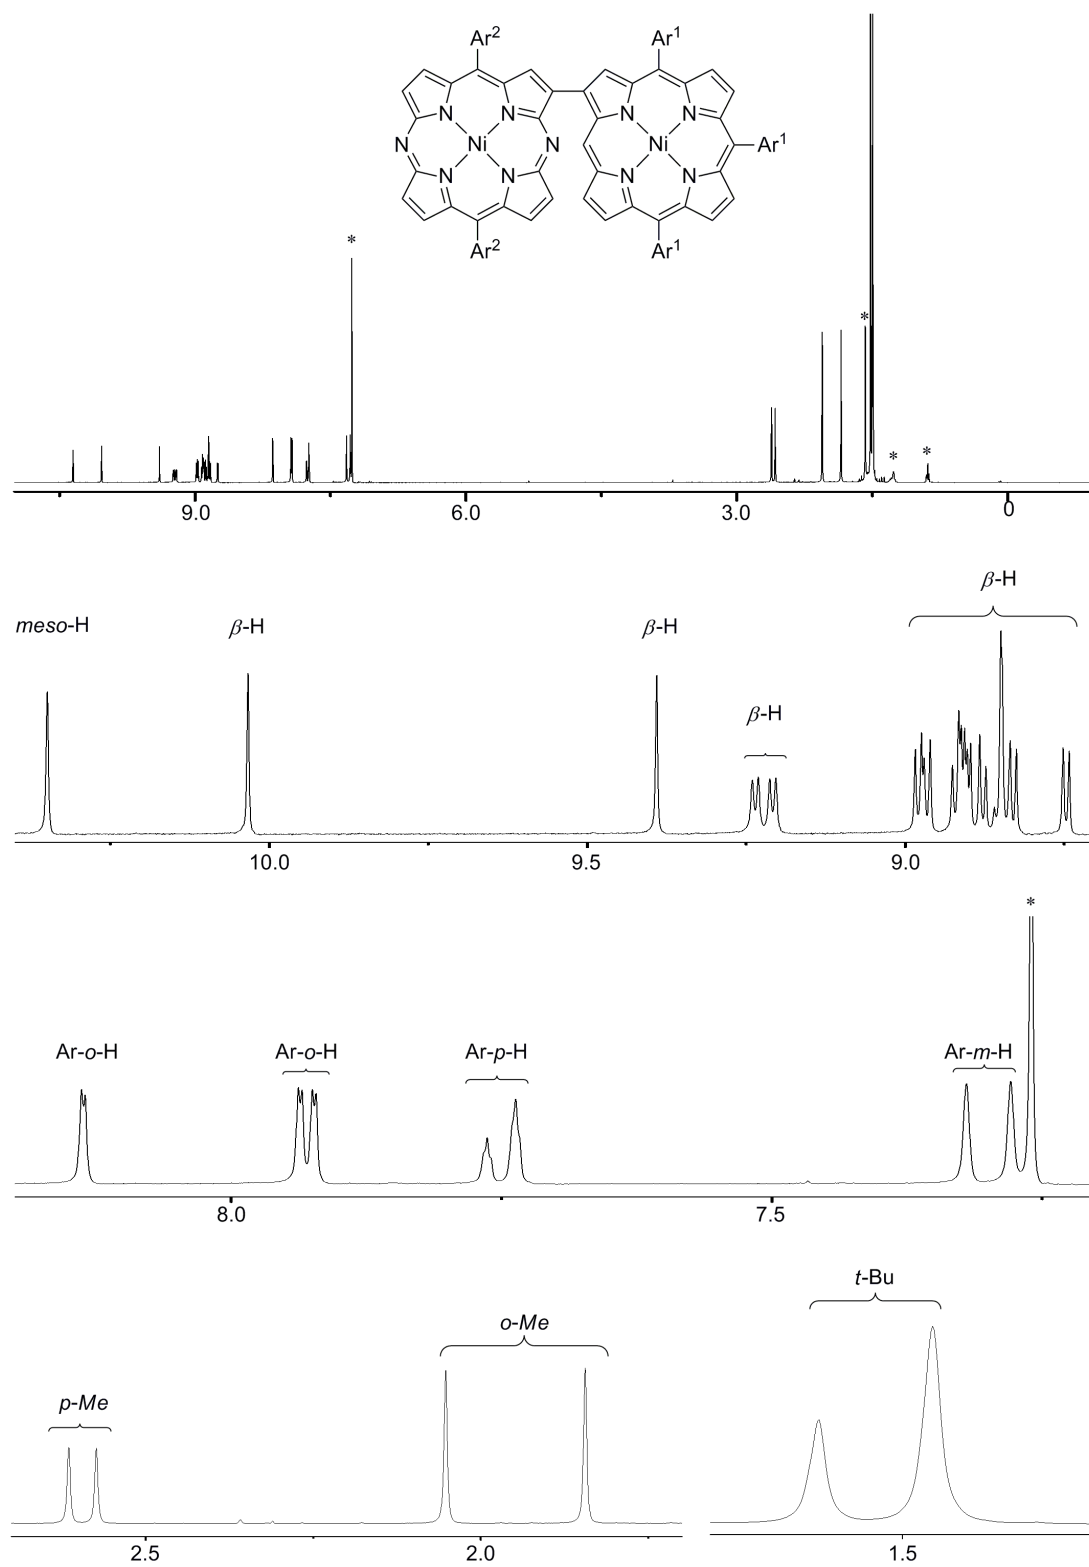

**Figure S1-21.**  $^1\text{H}$  NMR spectrum of **14** in  $\text{CDCl}_3$  at 298 K.

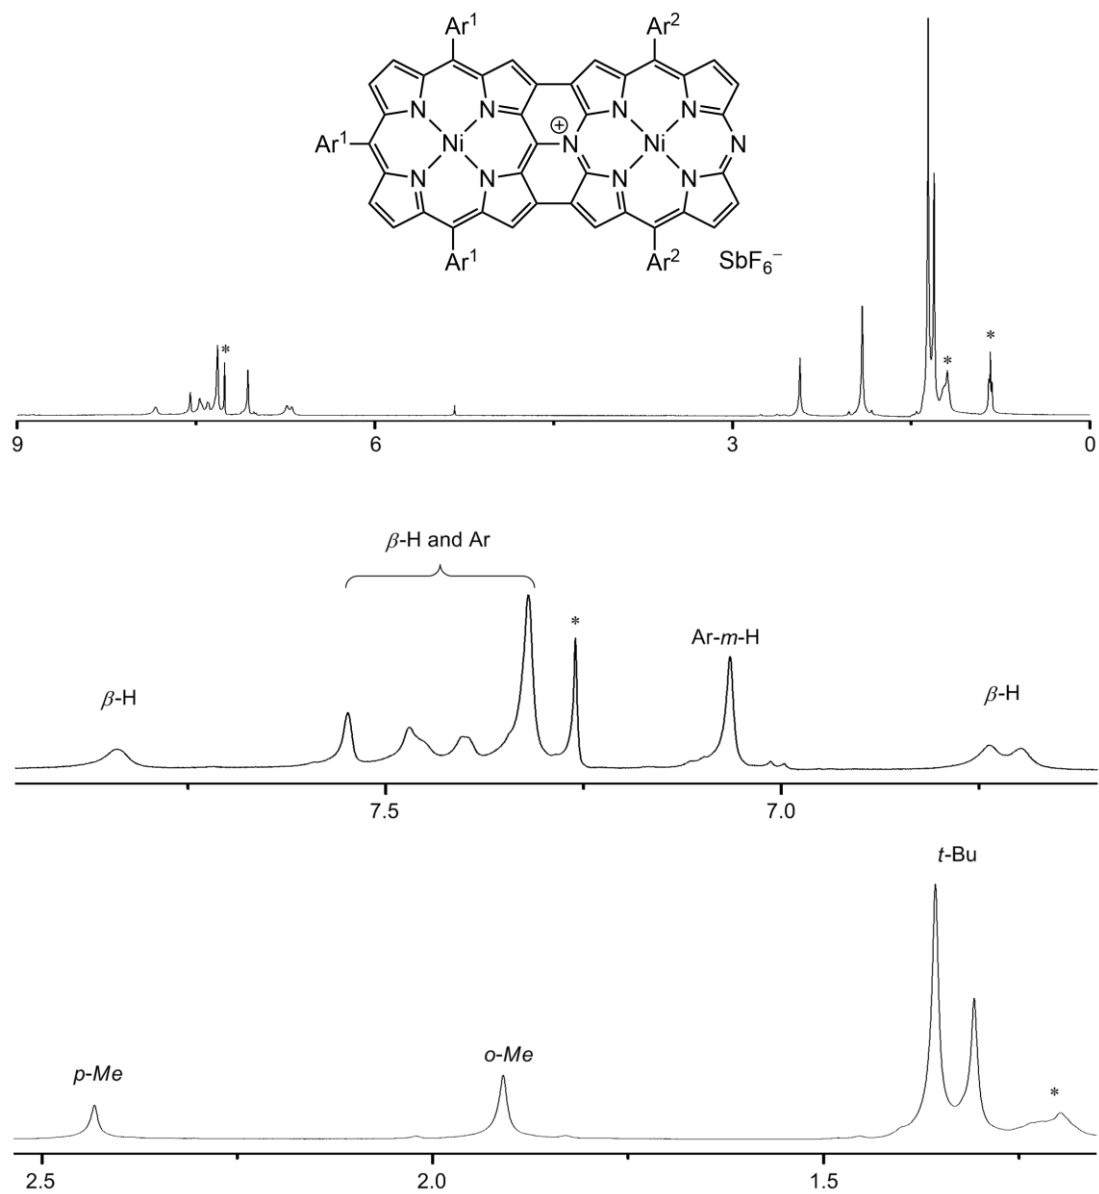

**Figure S1-22.**  $^1\text{H}$  NMR spectrum of **15** in  $\text{CDCl}_3$  at 213 K.

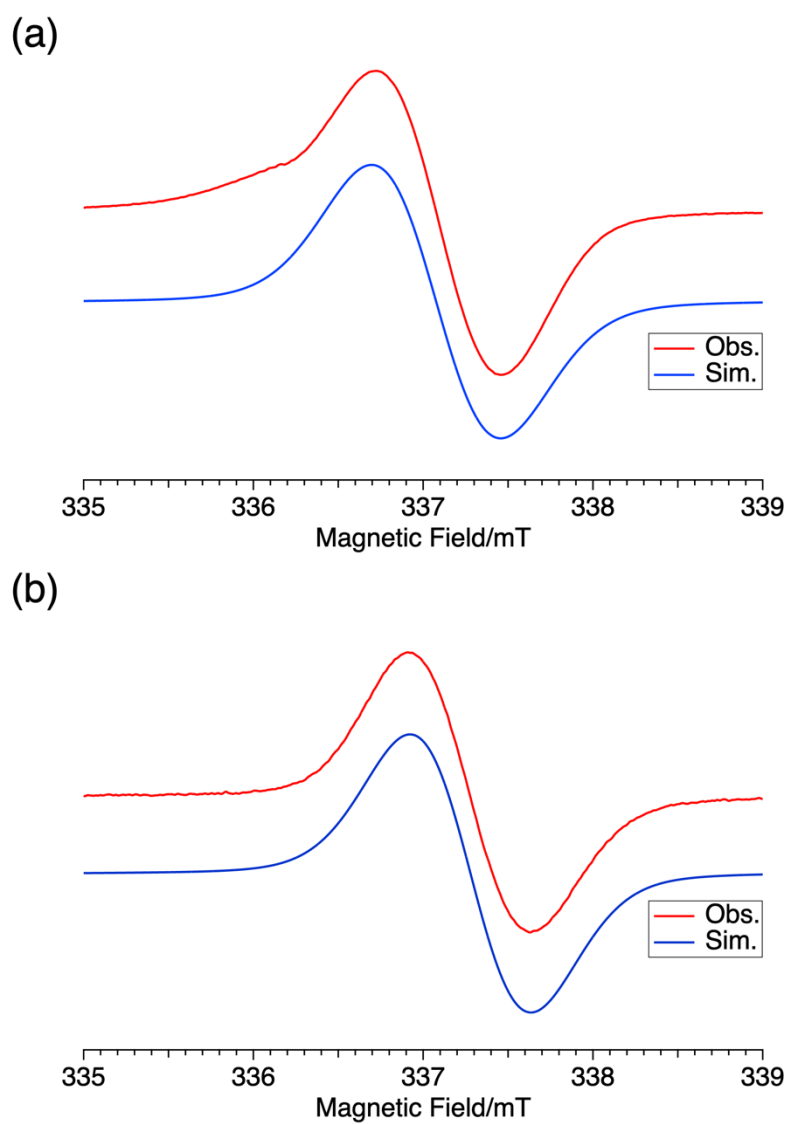

**Figure S1-23.** EPR spectra of (a) **12-ox** and (b) **14-ox** (0.1 mM in degassed toluene) at room temperature.

#### 4. High Resolution Mass Spectra

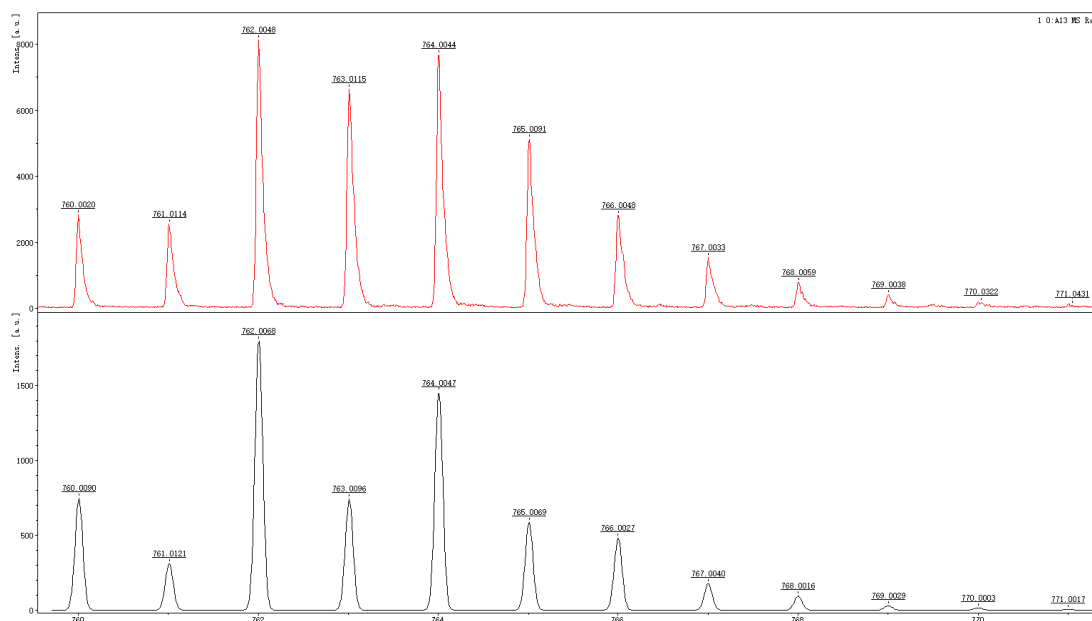

**Figure S2-1.** Observed (top) and simulated (bottom) MALDI-TOF mass spectrum of **2a** and **2b**.

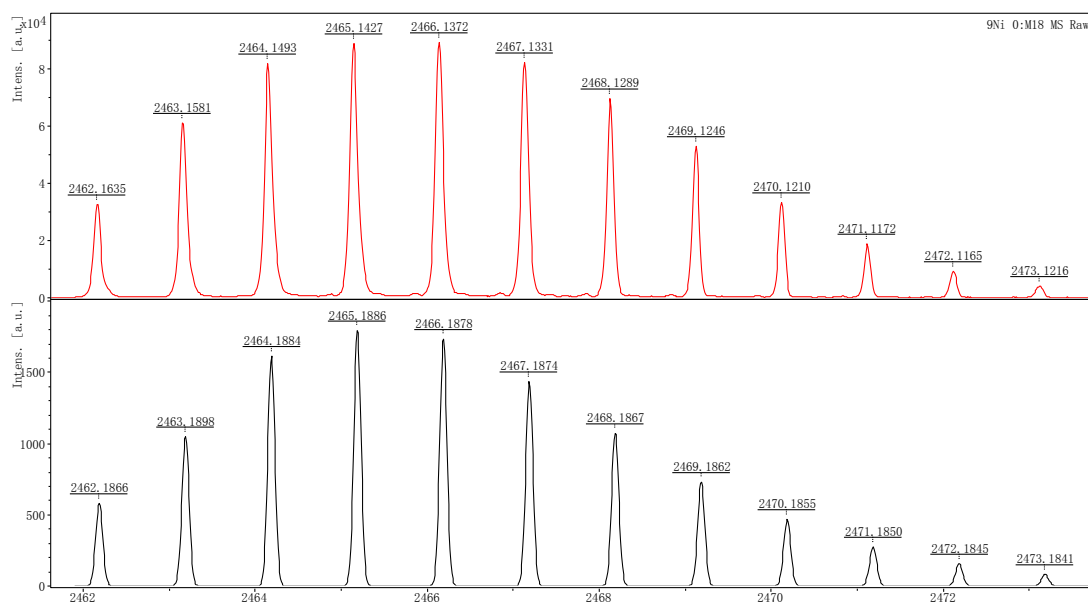

**Figure S2-2.** Observed (top) and simulated (bottom) MALDI-TOF mass spectrum of **3a**.

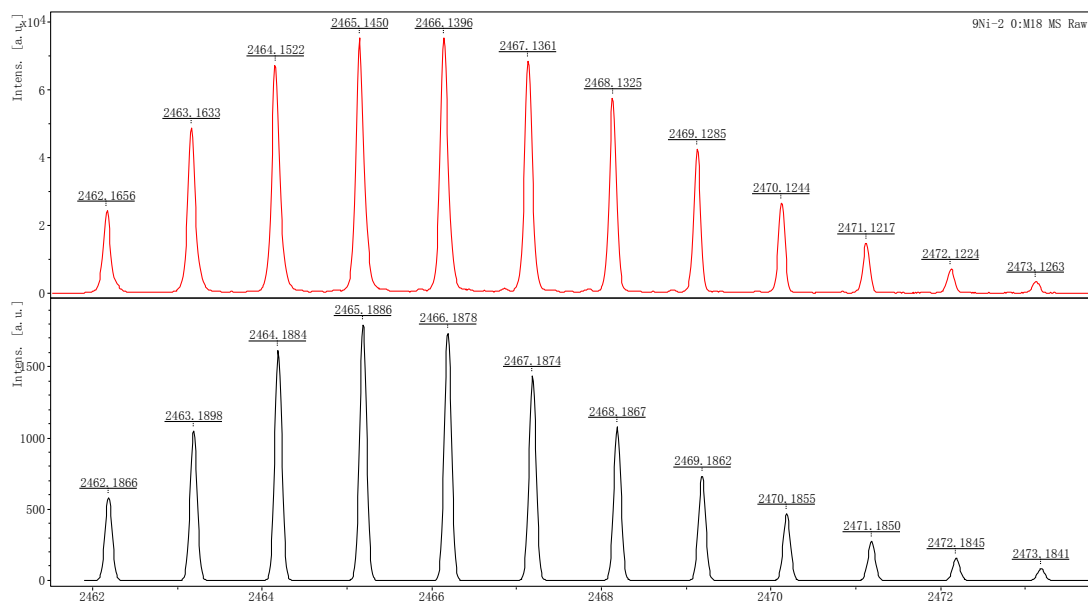

**Figure S2-3.** Observed (top) and simulated (bottom) MALDI-TOF mass spectrum of 3b.

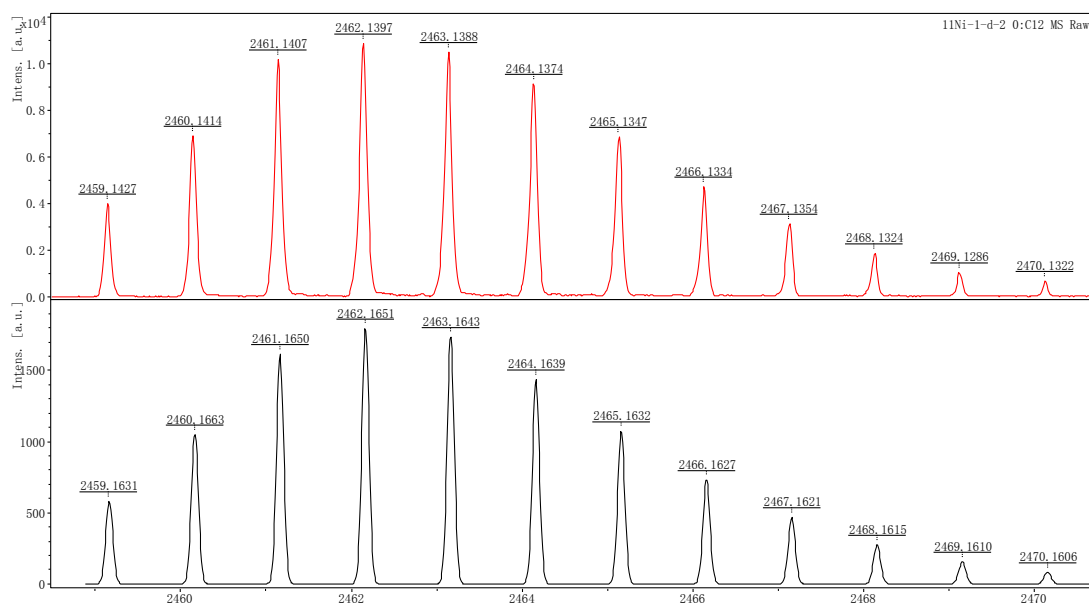

**Figure S2-4.** Observed (top) and simulated (bottom) MALDI-TOF mass spectrum of 4a.

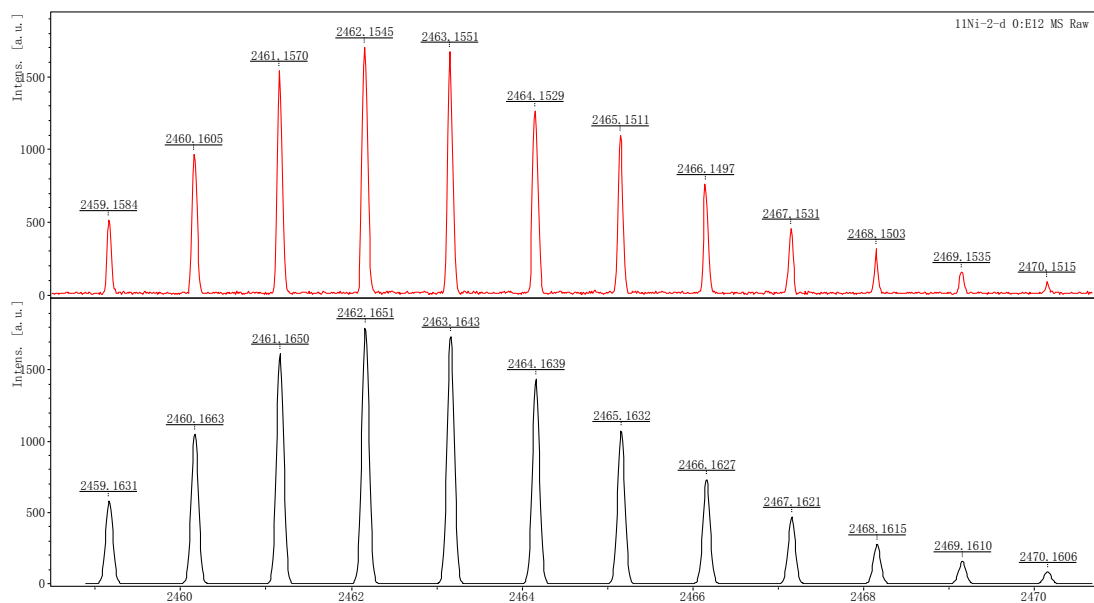

**Figure S2-5.** Observed (top) and simulated (bottom) MALDI-TOF mass spectrum of **4b**.

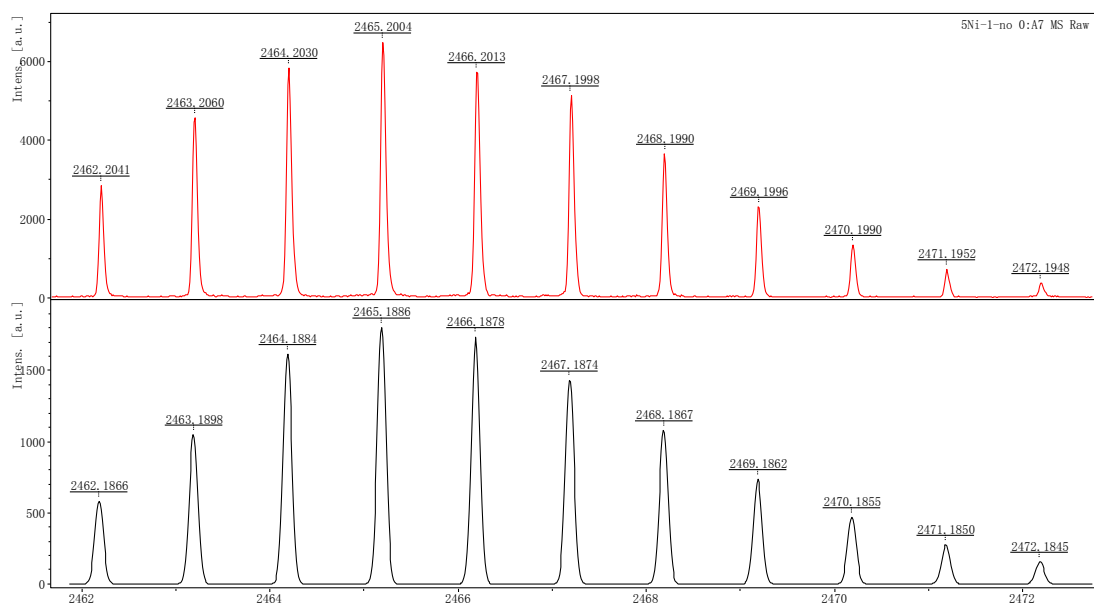

**Figure S2-6.** Observed (top) and simulated (bottom) MALDI-TOF mass spectrum of **5a**.

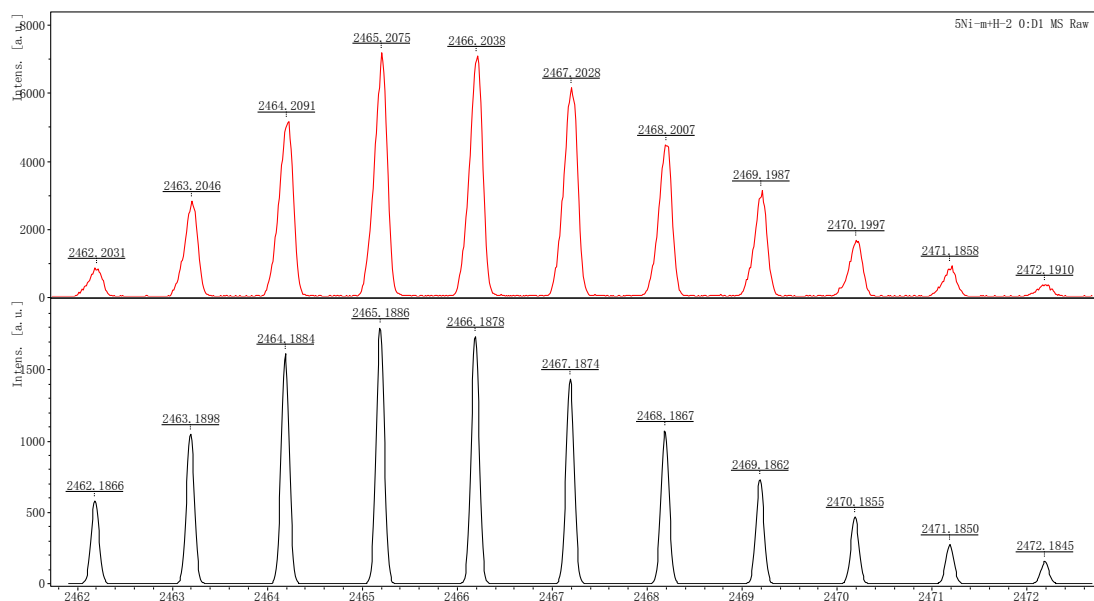

**Figure S2-7.** Observed (top) and simulated (bottom) MALDI-TOF mass spectrum of **5b**.

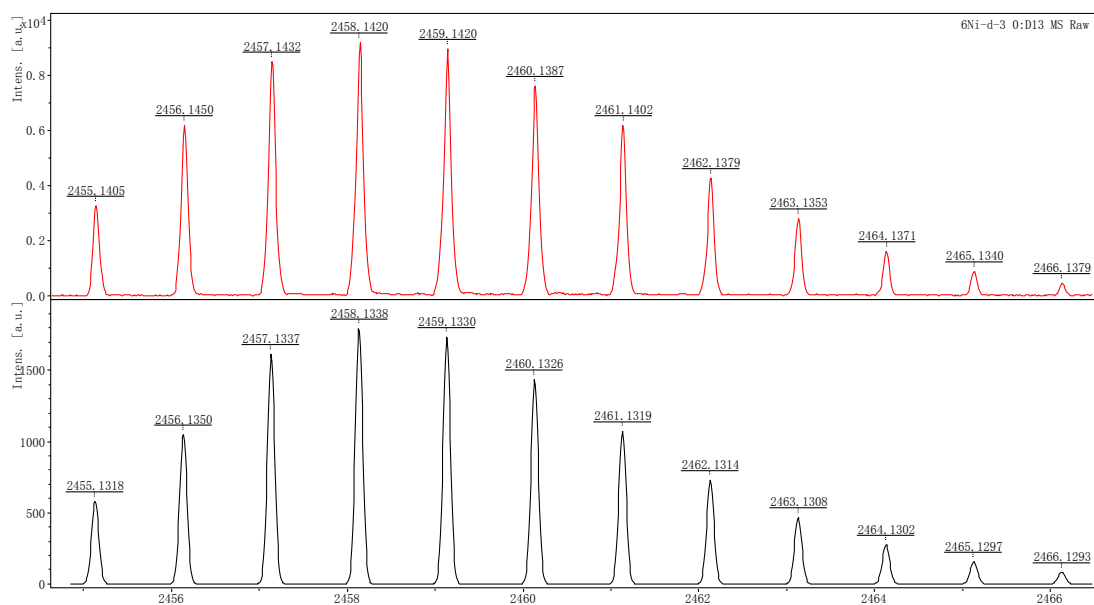

**Figure S2-8.** Observed (top) and simulated (bottom) MALDI-TOF mass spectrum of **6**.

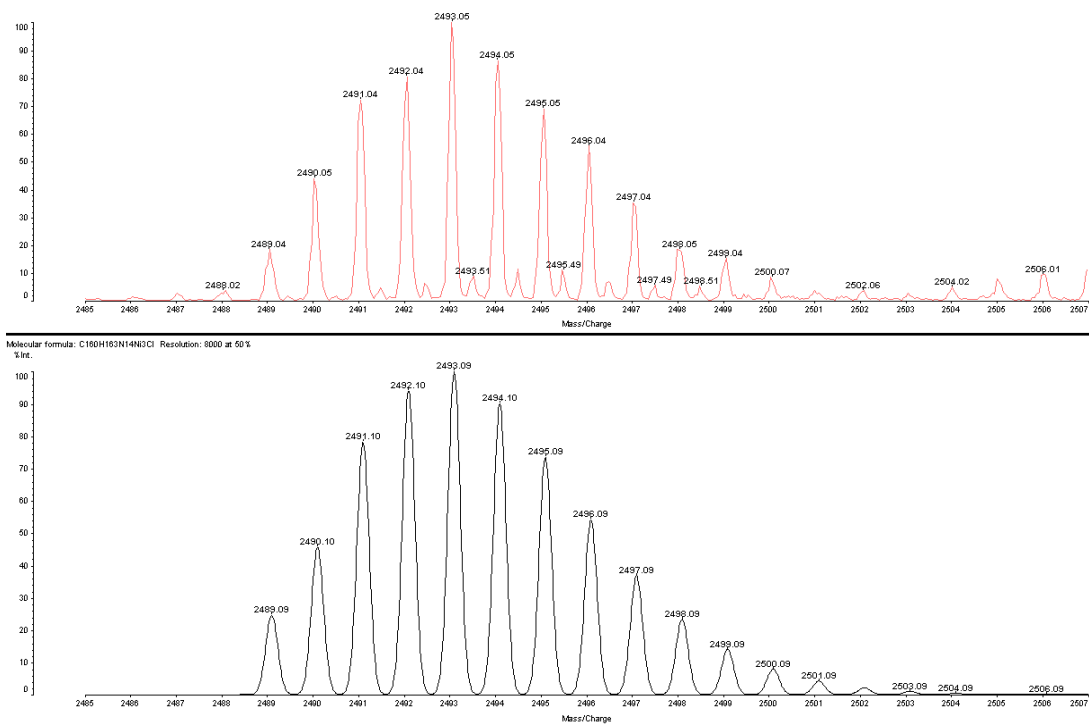

**Figure S2-9.** Observed (top) and simulated (bottom) MALDI-TOF mass spectrum of **6-Cl**.

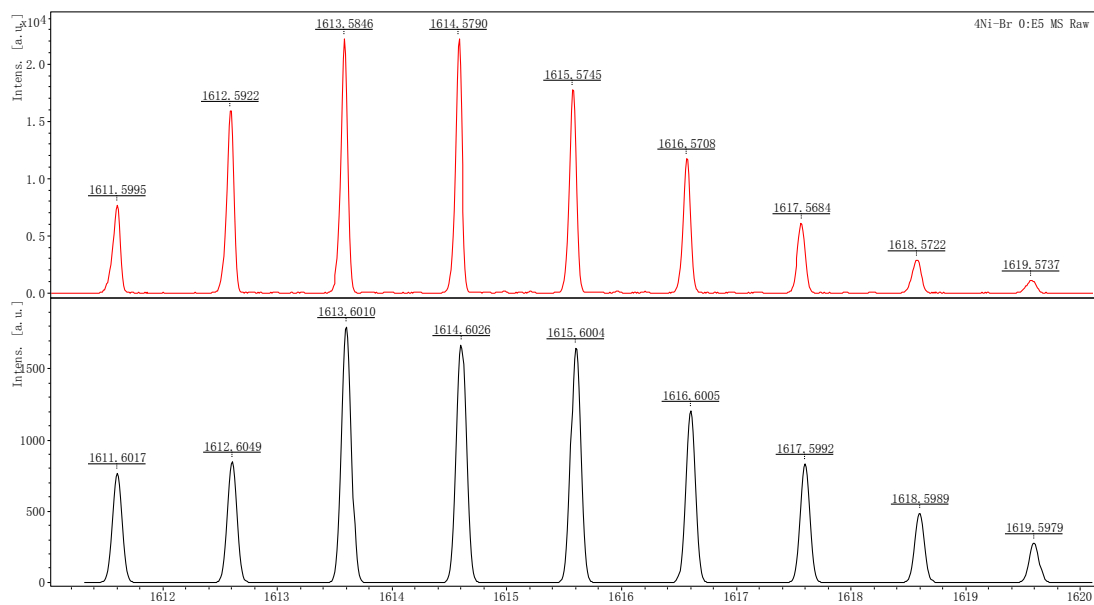

**Figure S2-10.** Observed (top) and simulated (bottom) MALDI-TOF mass spectrum of **7**.



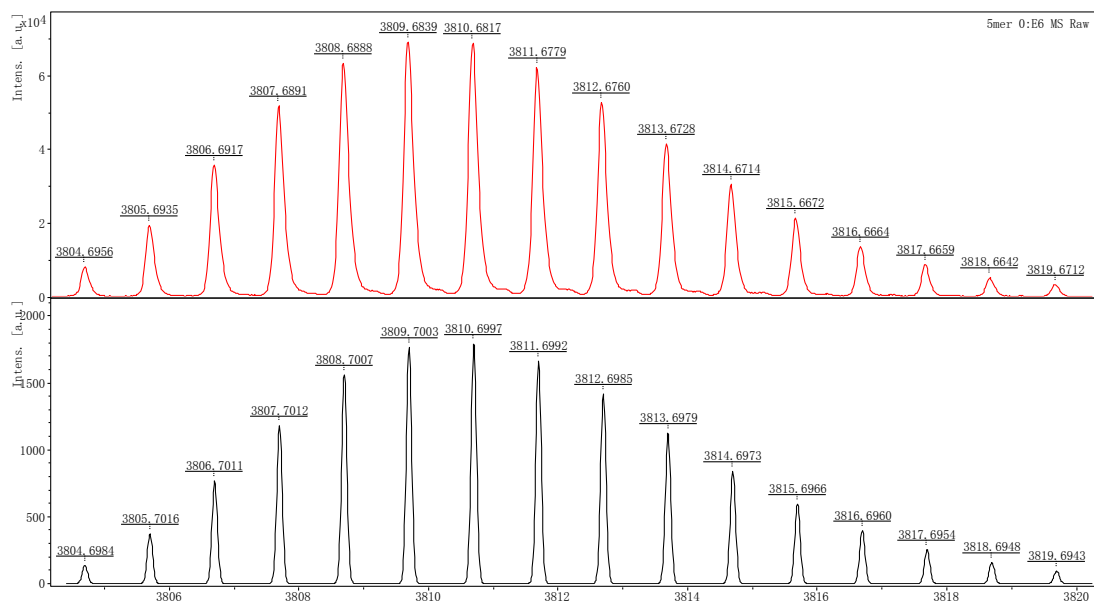

**Figure S2-11.** Observed (top) and simulated (bottom) MALDI-TOF mass spectrum of **9**.

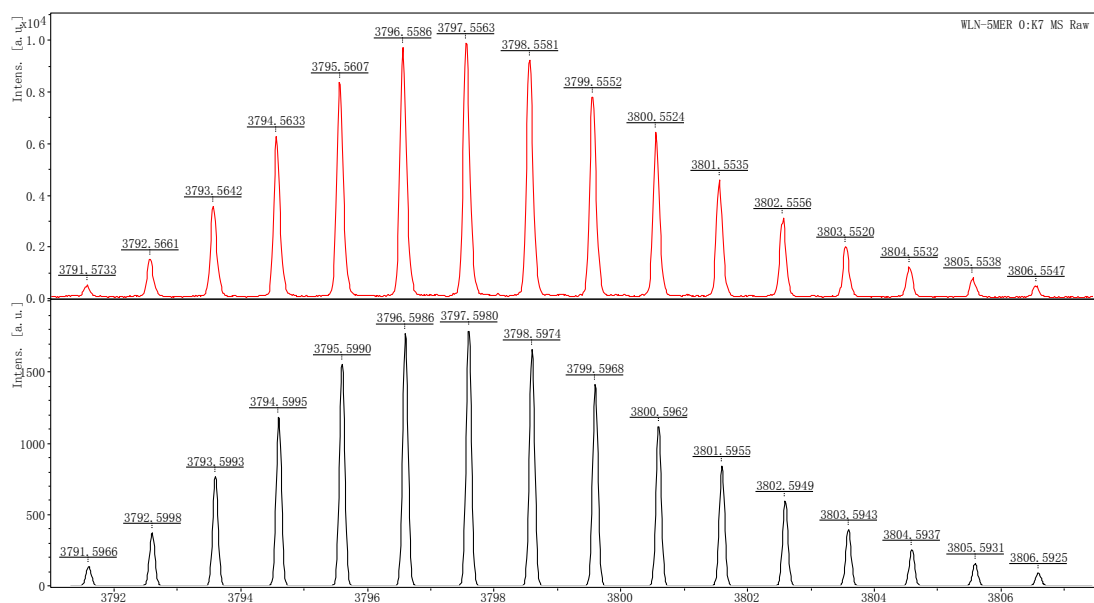

**Figure S2-12.** Observed (top) and simulated (bottom) MALDI-TOF mass spectrum of **10**.

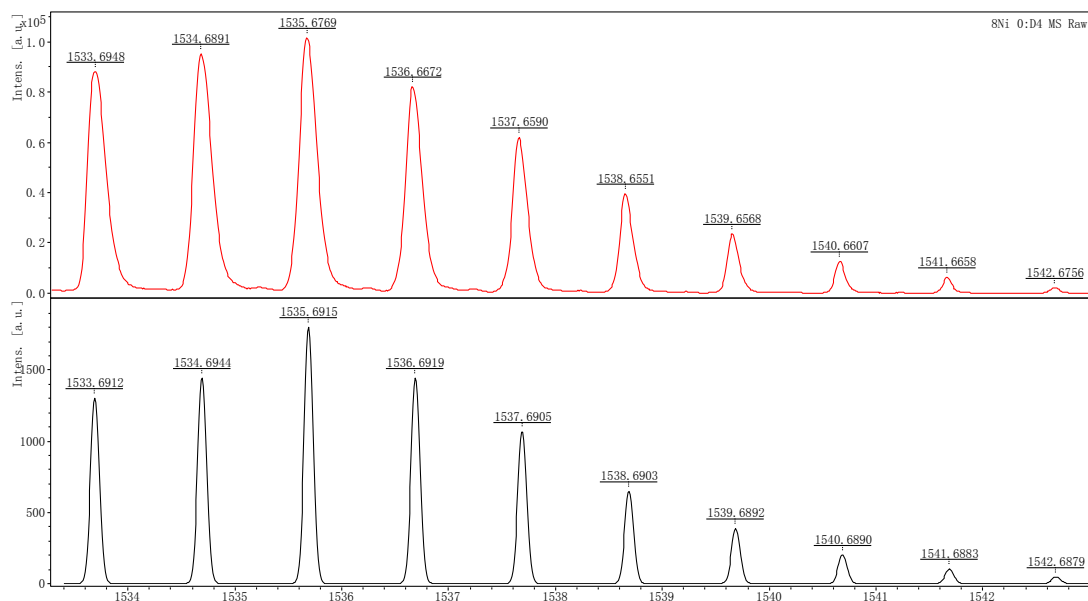

**Figure S2-13.** Observed (top) and simulated (bottom) MALDI-TOF mass spectrum of **12**.

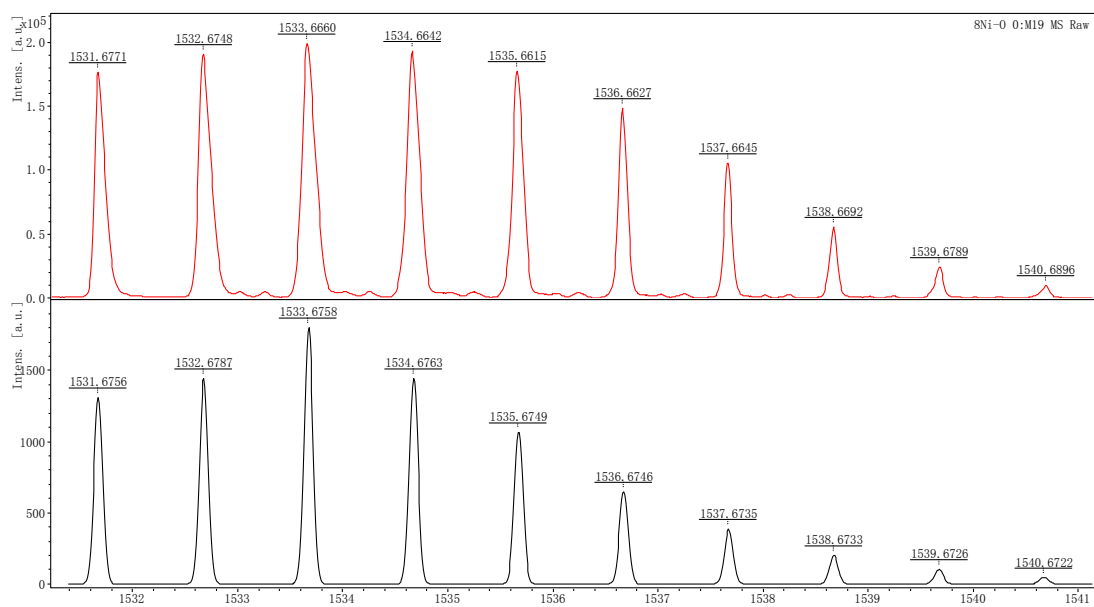

**Figure S2-14.** Observed (top) and simulated (bottom) MALDI-TOF mass spectrum of **12-ox**.

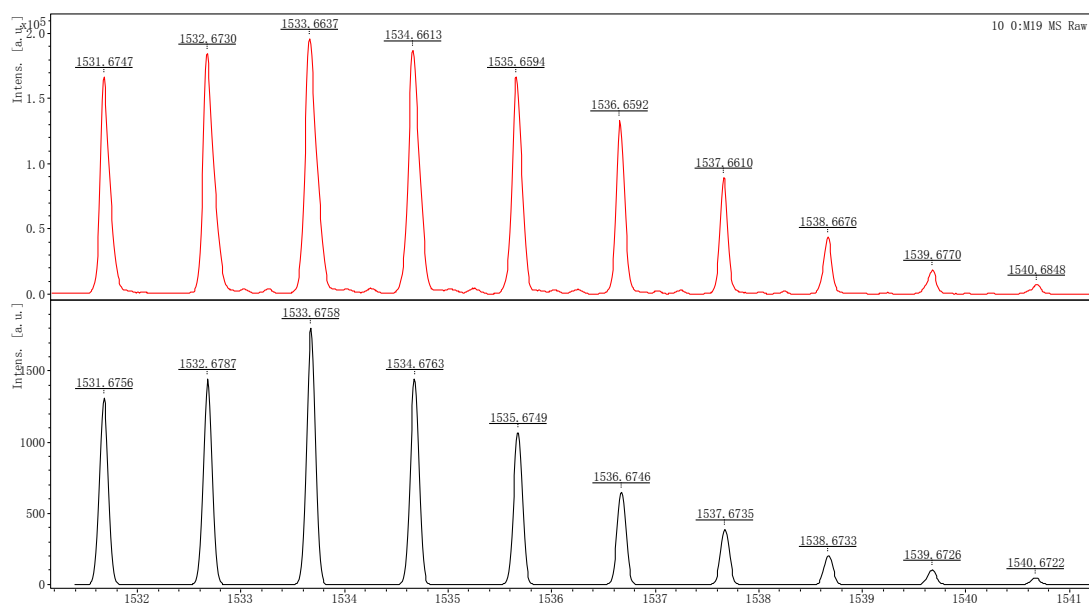

**Figure S2-15.** Observed (top) and simulated (bottom) MALDI-TOF mass spectrum of **13**.

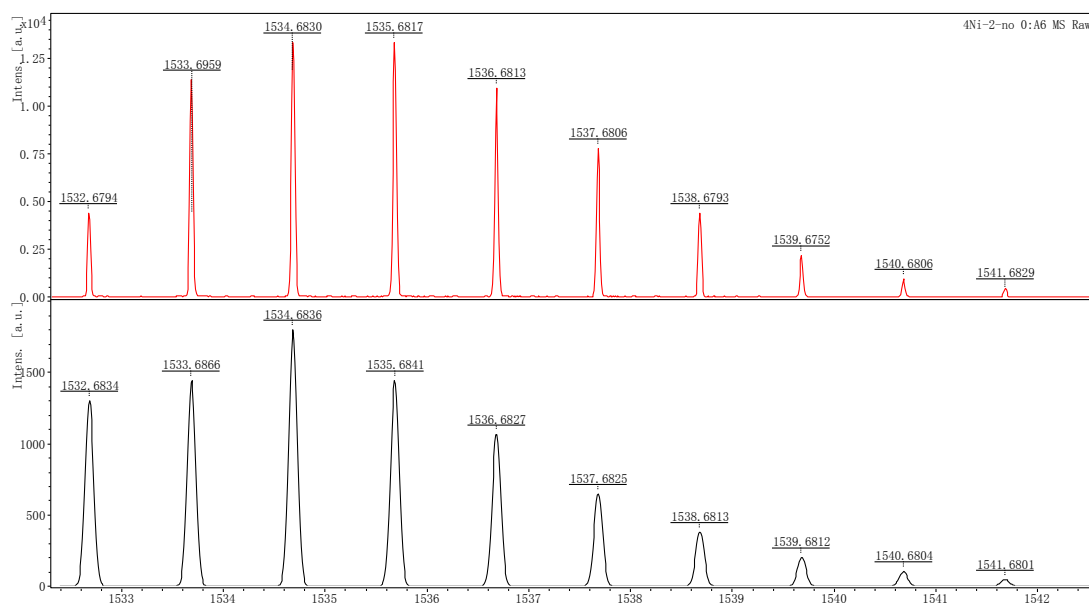

**Figure S2-16.** Observed (top) and simulated (bottom) MALDI-TOF mass spectrum of **14**.

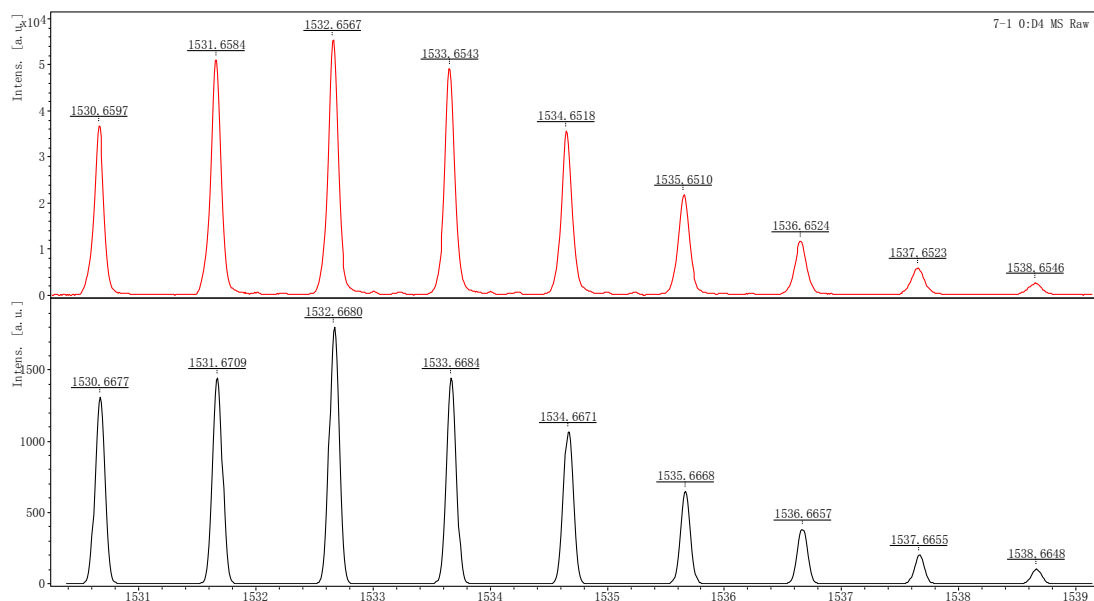

**Figure S2-17.** Observed (top) and simulated (bottom) MALDI-TOF mass spectrum of **14-ox**.

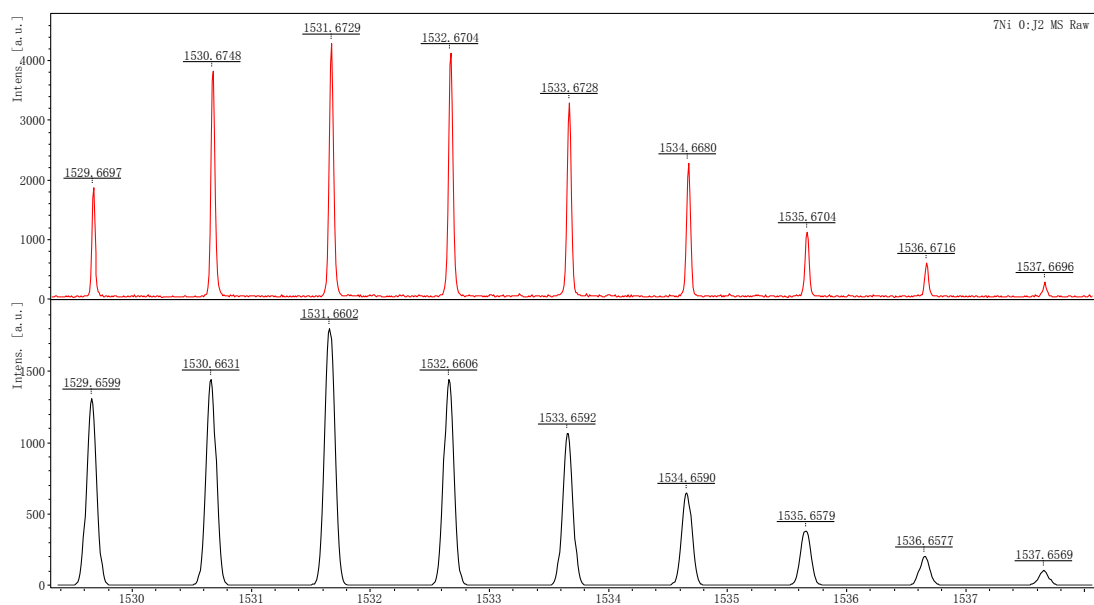

**Figure S2-18.** Observed (top) and simulated (bottom) MALDI-TOF mass spectrum of **15**.

## 5. UV/Vis/NIR Absorption Spectra

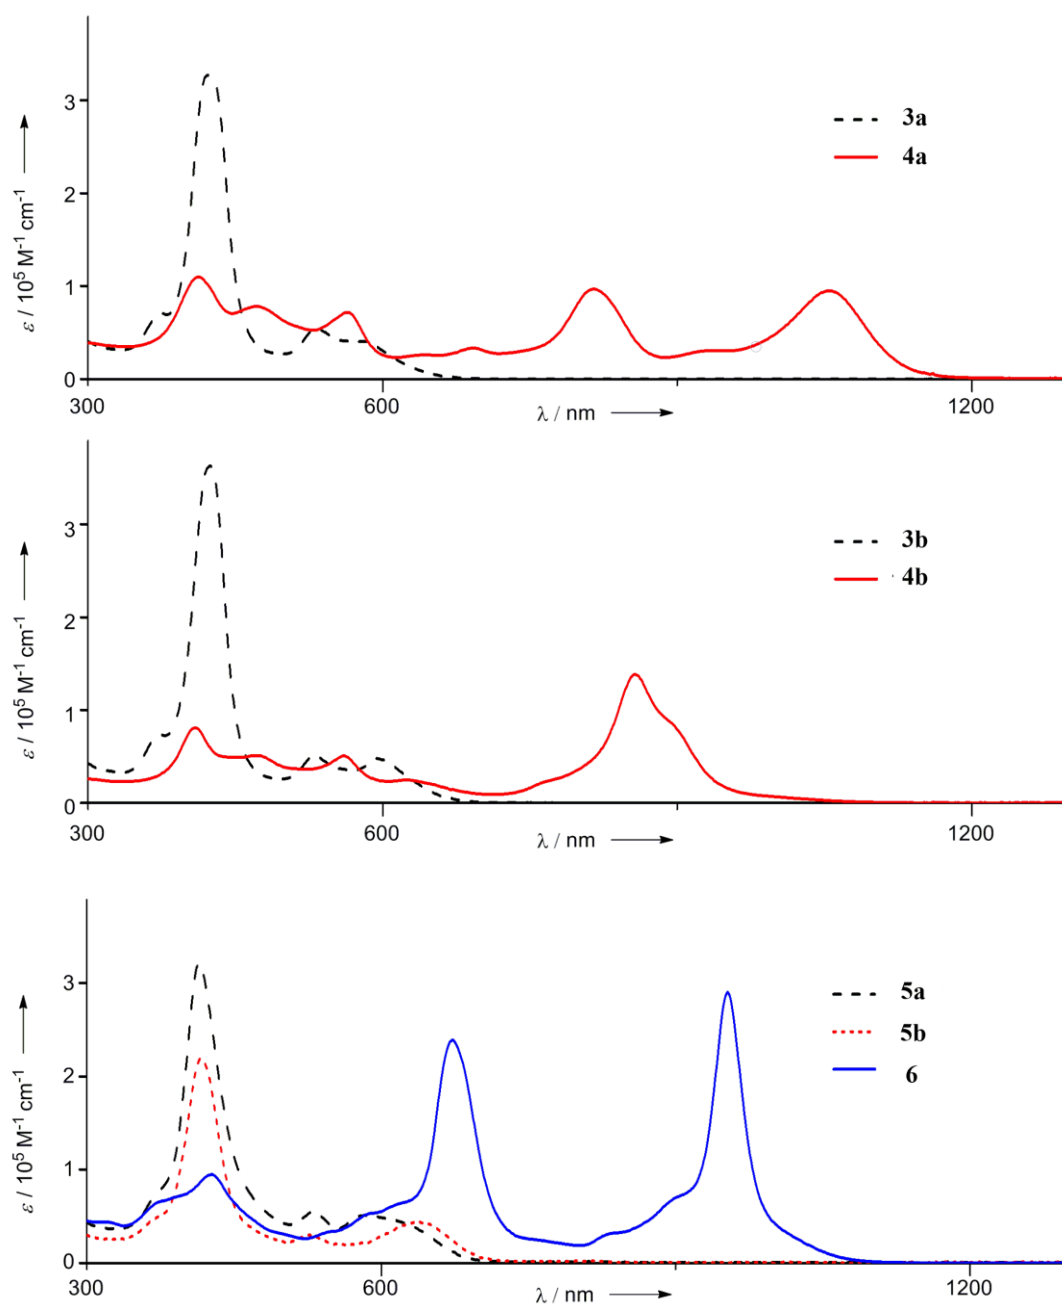

**Figure S3-1.** UV/Vis absorption spectra of **3a**, **3b**, **4a**, **4b**, **5a**, **5b**, and **6** in  $\text{CH}_2\text{Cl}_2$ .

**Table S1-1.** UV/Vis absorptions recorded in CH<sub>2</sub>Cl<sub>2</sub>.

| Compound  | $\lambda$ [nm] ( $\log \epsilon$ )                          |
|-----------|-------------------------------------------------------------|
| <b>3a</b> | 374 (4.86), 422 (5.51), 532 (4.71), 577 (4.61)              |
| <b>3b</b> | 373 (4.87), 425 (5.56), 532 (4.71), 595 (4.68)              |
| <b>4a</b> | 412 (5.04), 473 (4.89), 565 (4.86), 814 (4.99), 1054 (4.98) |
| <b>4b</b> | 409 (4.91), 473 (4.89), 560 (4.70), 624 (4.39), 857 (5.14)  |
| <b>5a</b> | 415 (5.51), 532 (4.74), 584 (4.71)                          |
| <b>5b</b> | 417 (5.34), 526 (4.47), 638 (4.64)                          |
| <b>6</b>  | 316 (4.65), 427 (4.98), 672 (5.38), 953 (5.46)              |

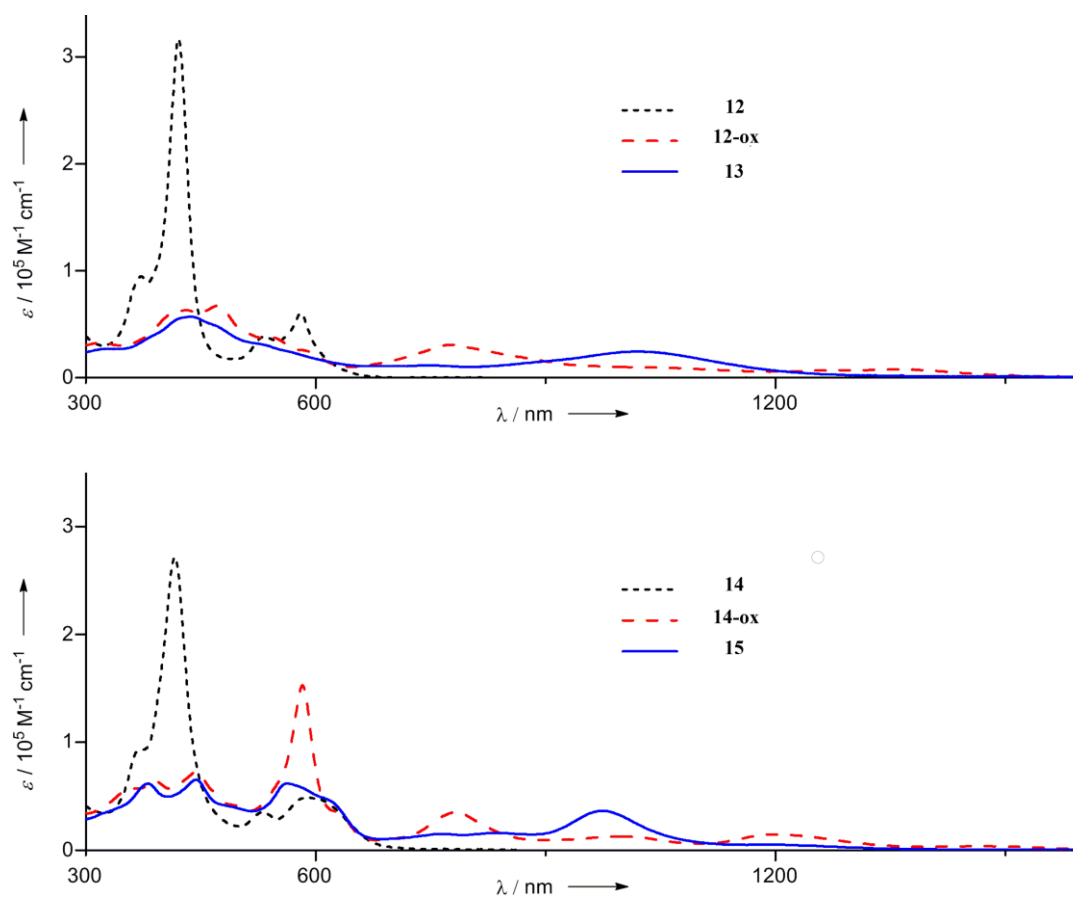

**Figure S3-2.** UV/Vis absorption spectra of **12**, **12-ox**, **13**, **14**, **14-ox**, and **15** in CH<sub>2</sub>Cl<sub>2</sub>.

**Table S1-2.** UV/Vis absorptions recorded in CH<sub>2</sub>Cl<sub>2</sub>.

| Compound     | $\lambda$ [nm] (log $\epsilon$ )                                         |
|--------------|--------------------------------------------------------------------------|
| <b>12</b>    | 372 (4.98), 421 (5.50), 532 (4.58), 581 (4.78)                           |
| <b>12-ox</b> | 316 (4.51), 430 (4.80), 472 (4.83), 543 (4.58), 776 (4.49), 1357 (3.90)  |
| <b>13</b>    | 436 (4.64), 748 (3.95), 1020 (4.27)                                      |
| <b>14</b>    | 416 (5.43), 532 (4.55), 592 (4.69)                                       |
| <b>14-ox</b> | 390 (4.81), 444 (4.86), 583 (5.18), 783 (4.55), 1000 (4.11), 1200 (4.16) |
| <b>15</b>    | 381 (4.79), 444 (4.82), 563 (4.79), 766 (4.17), 834 (4.20), 974 (4.56)   |

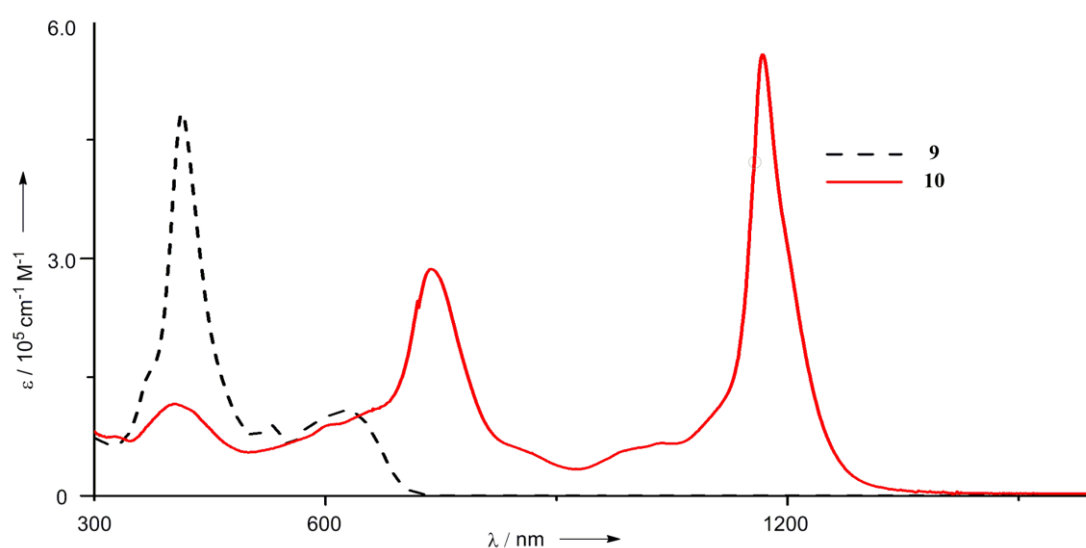**Figure S3-3.** UV/Vis absorption spectra of **9** and **10** in CH<sub>2</sub>Cl<sub>2</sub>.**Table S1-3.** UV/Vis absorptions recorded in CH<sub>2</sub>Cl<sub>2</sub>.

| Compound  | $\lambda$ [nm] (log $\epsilon$ )                             |
|-----------|--------------------------------------------------------------|
| <b>9</b>  | 414 (5.68), 529 (4.95), 627 (5.03)                           |
| <b>10</b> | 326 (4.88), 405 (5.06), 737 (5.46), 1037 (4.82), 1168 (5.75) |

## 6. Electrochemical Data

Cyclic voltammograms and differential pulse voltammograms were measured in benzonitrile with 0.1 M  $n\text{Bu}_4\text{NPF}_6$ ; potentials were determined vs ferrocene/ferrocenium ion by differential pulse voltammograms; working electrode: glassy carbon; counter electrode: Pt wire; reference electrode: Ag/AgNO<sub>3</sub>.

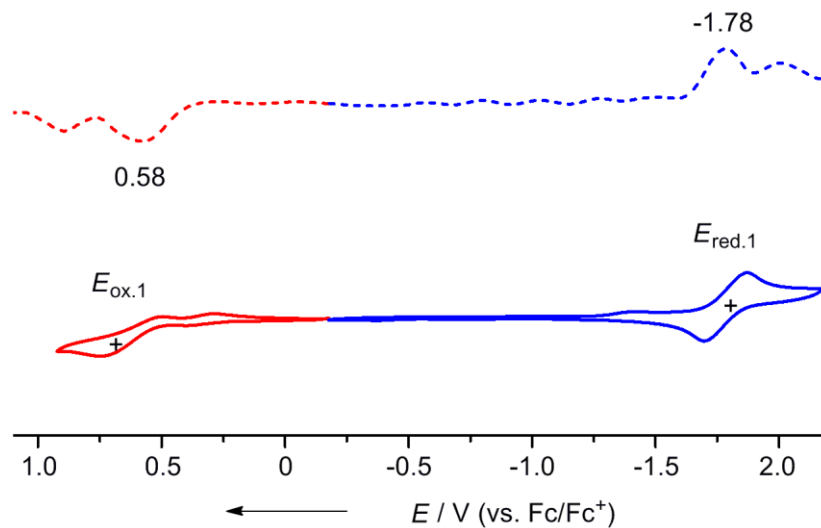

**Figure S4-1.** Cyclic voltammogram and differential pulse voltammogram of Ni<sup>II</sup> porphyrin (P).

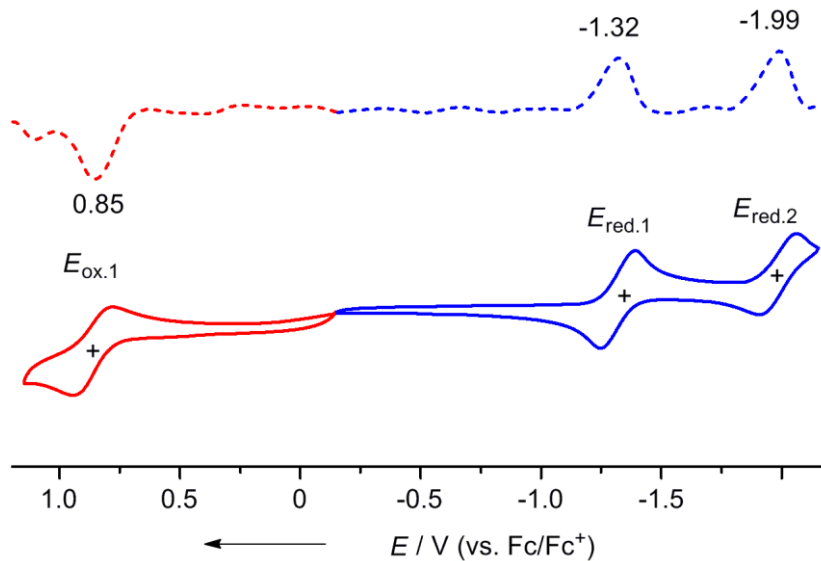

**Figure S4-2.** Cyclic voltammogram and differential pulse voltammogram of Ni<sup>II</sup> diazaporphyrin (DAP).



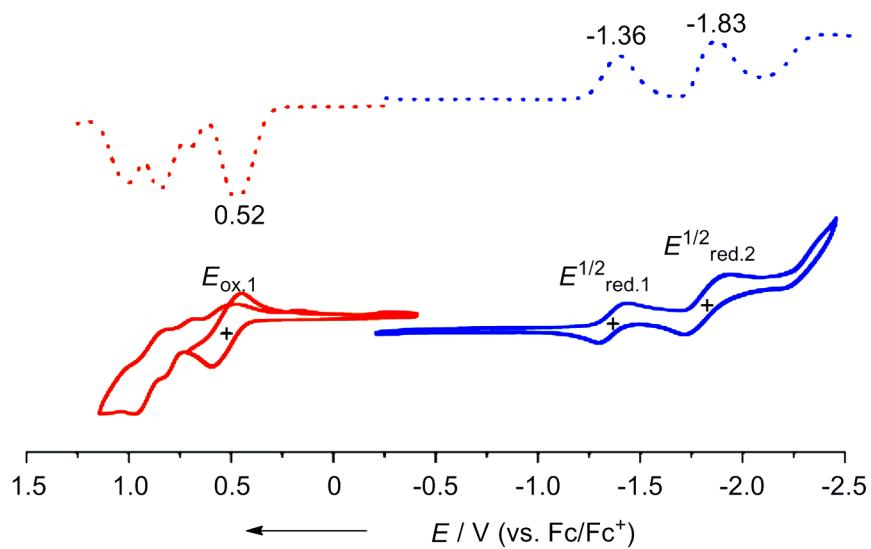

**Figure S4-3.** Cyclic voltammogram and differential pulse voltammogram of **3a**.

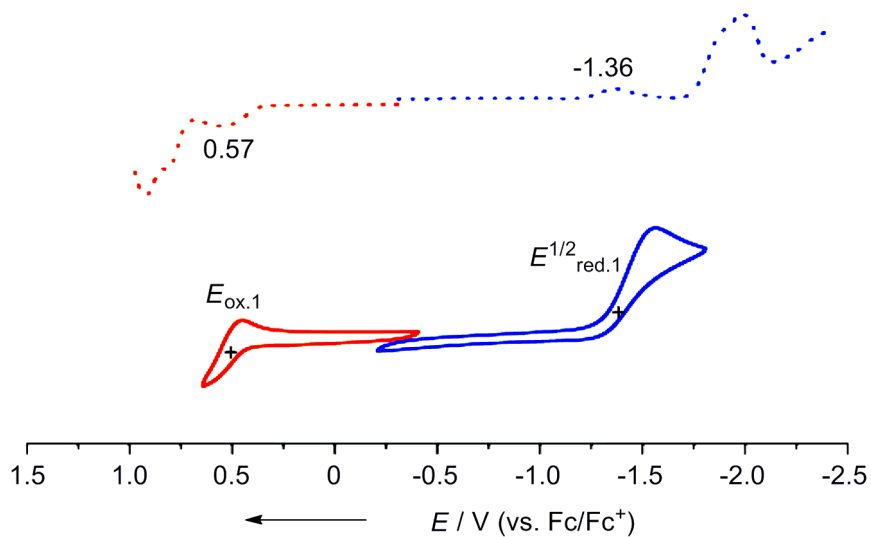

**Figure S4-4.** Cyclic voltammogram and differential pulse voltammogram of **3b**.

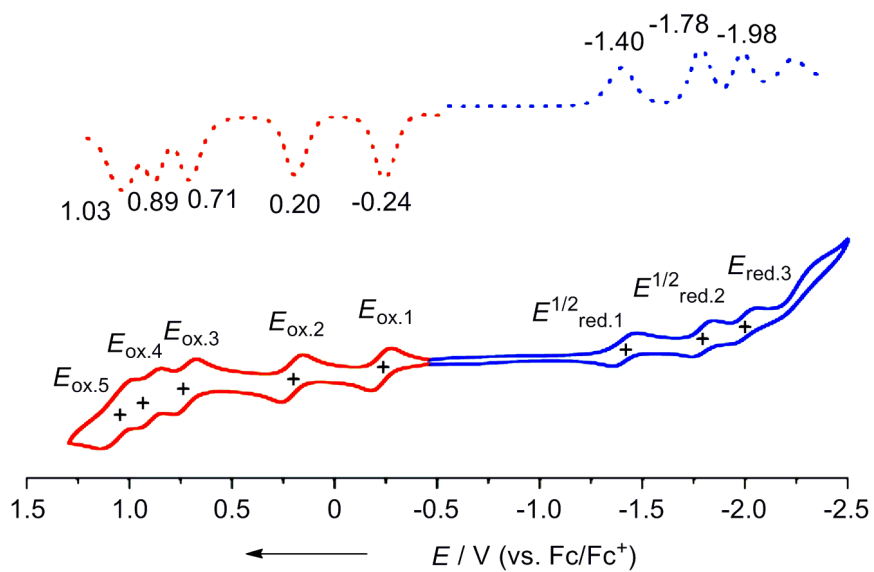

**Figure S4-5.** Cyclic voltammogram and differential pulse voltammogram of **4a**.

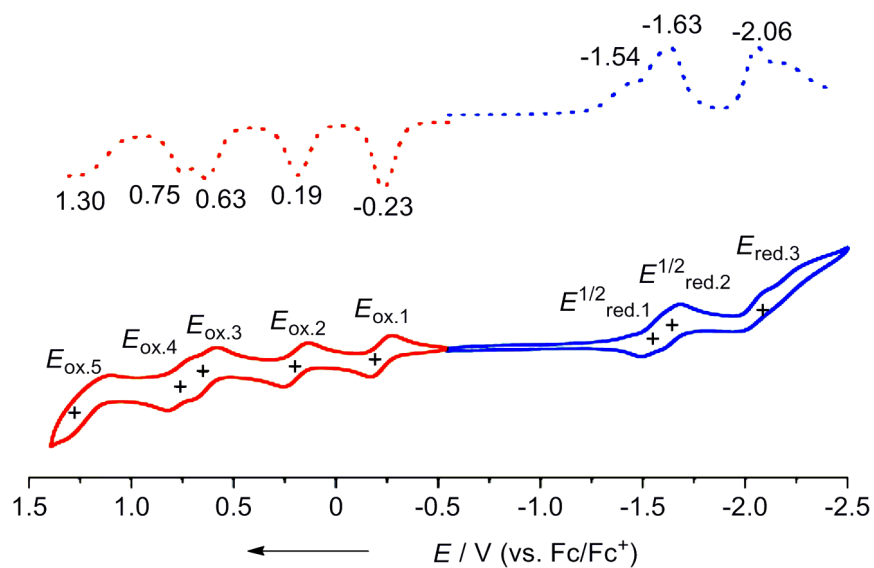

**Figure S4-6.** Cyclic voltammogram and differential pulse voltammogram of **4b**.

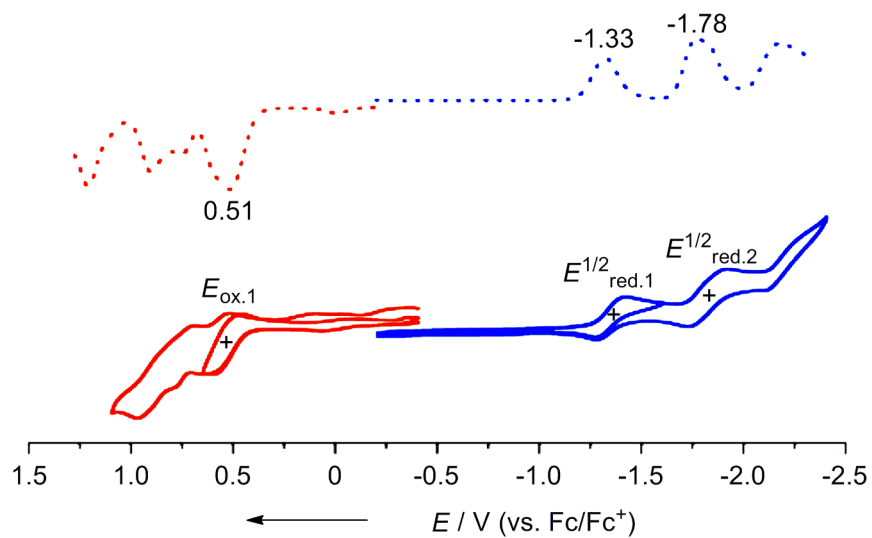

**Figure S4-7.** Cyclic voltammogram and differential pulse voltammogram of **5a**.

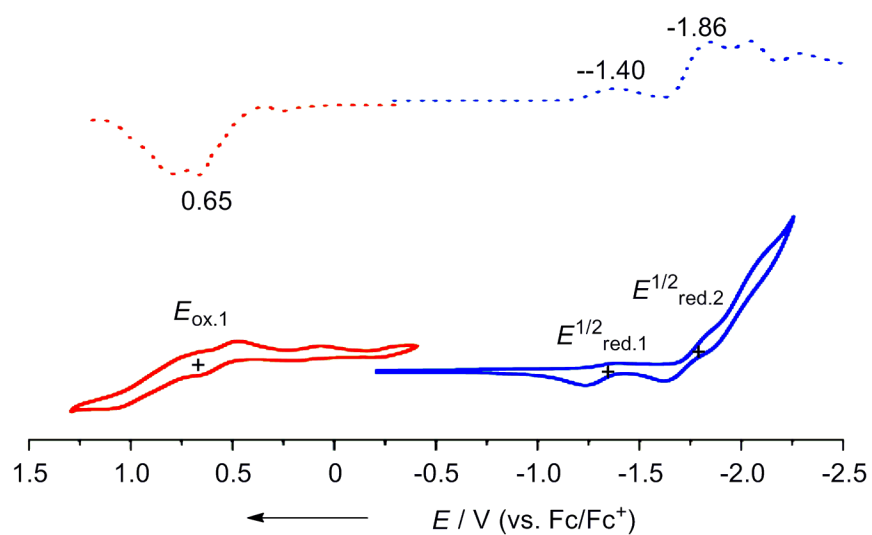

**Figure S4-8.** Cyclic voltammogram and differential pulse voltammogram of **5b**.

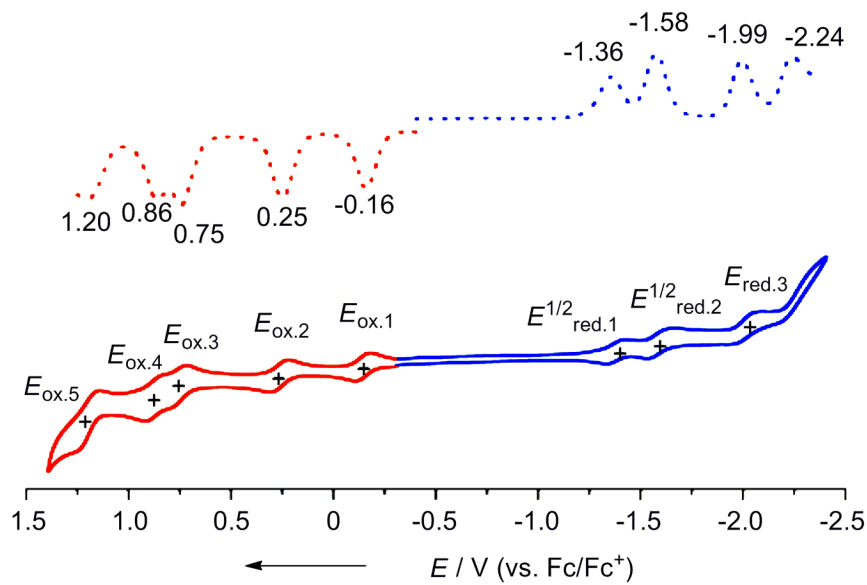

**Figure S4-9.** Cyclic voltammogram and differential pulse voltammogram of **6**.

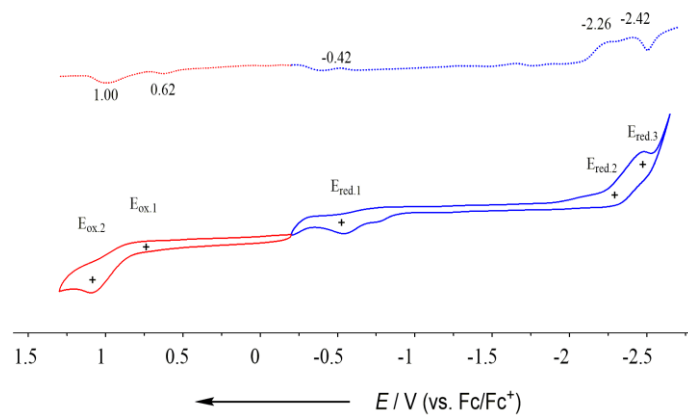

**Figure S4-10.** Cyclic voltammogram and differential pulse voltammogram of **10**.

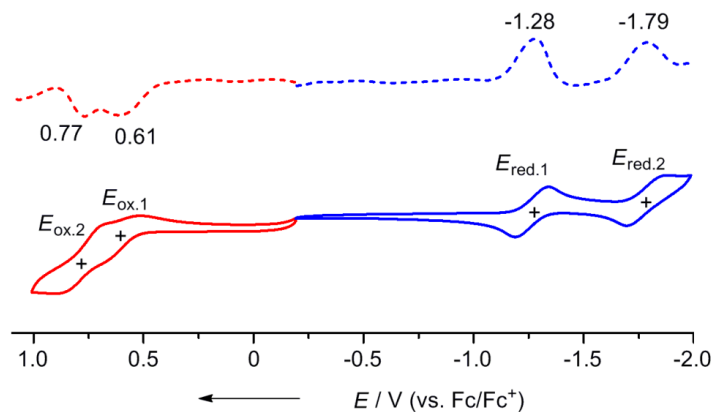

**Figure S4-11.** Cyclic voltammogram and differential pulse voltammogram of **12**.

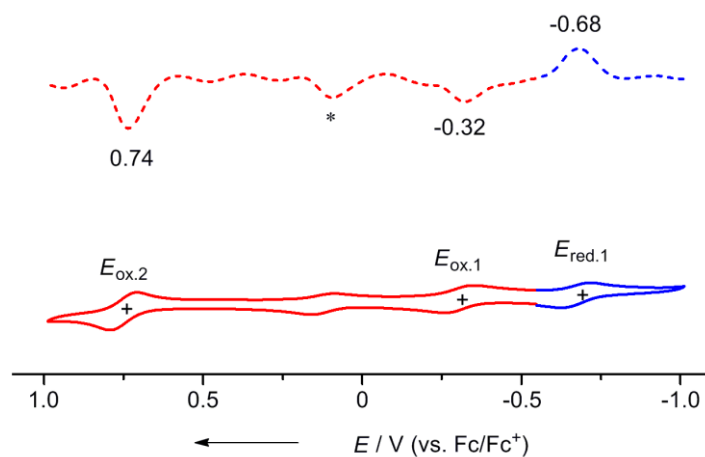

**Figure S4-12.** Cyclic voltammogram and differential pulse voltammogram of **12-ox**.

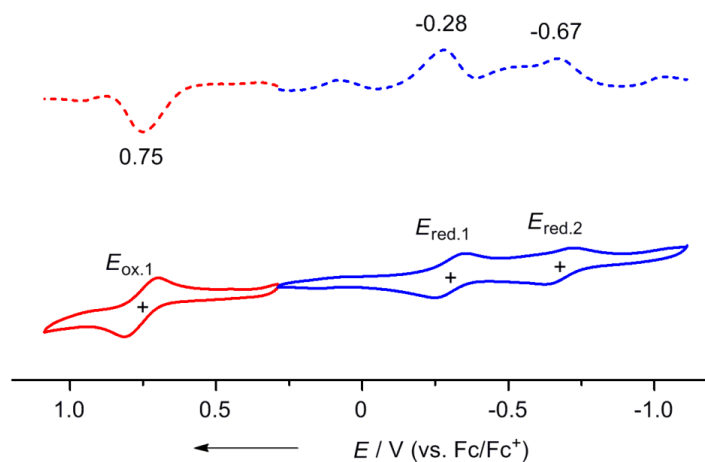

**Figure S4-13.** Cyclic voltammogram and differential pulse voltammogram of **13**.

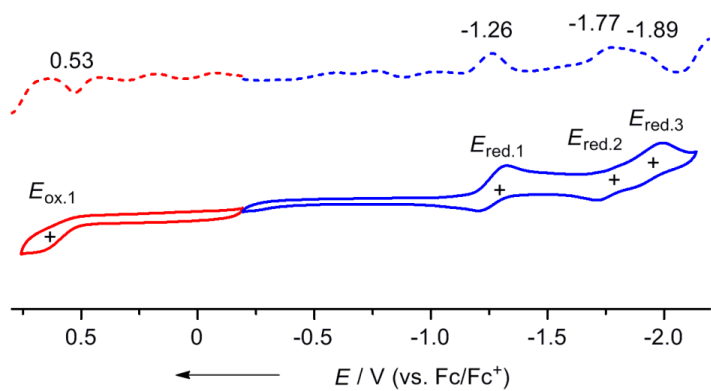

**Figure S4-14.** Cyclic voltammogram and differential pulse voltammogram of **14**.

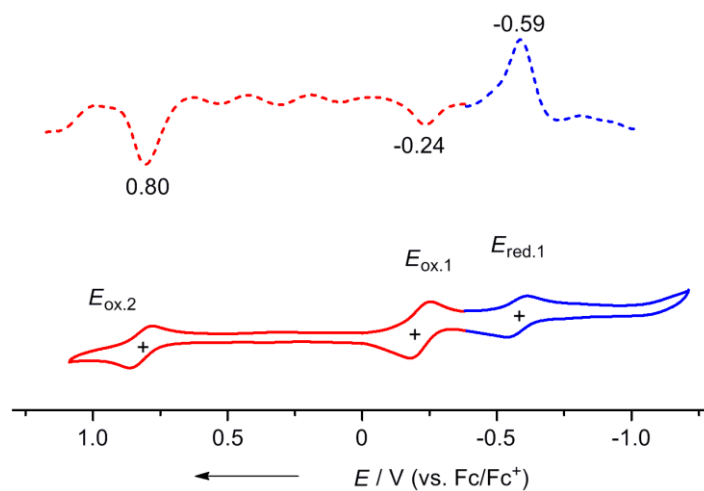

**Figure S4-15.** Cyclic voltammogram and differential pulse voltammogram of **14-ox**.

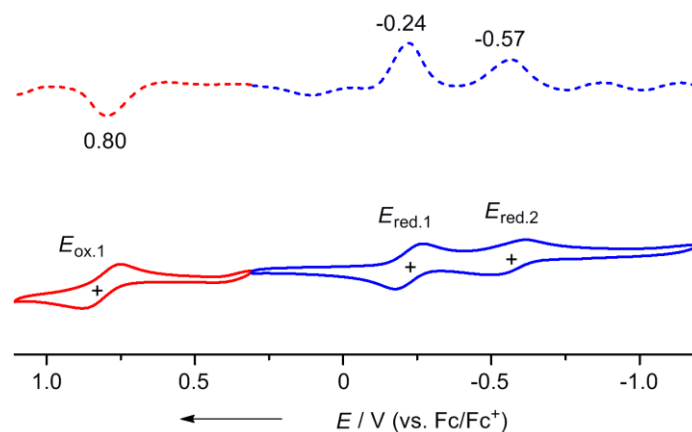

**Figure S4-16.** Cyclic voltammogram and differential pulse voltammogram of **15**.

**Table S2-1.** Summary of the electrochemical potentials (V) and HOMO-LUMO gaps (eV).

| Compound  | $E_{ox,4}$ | $E_{ox,3}$ | $E_{ox,2}$ | $E_{ox,1}$        | $E_{red,1}$        | $E_{red,2}$ | $E_{red,3}$ | $\Delta E_{HL}^b$ |
|-----------|------------|------------|------------|-------------------|--------------------|-------------|-------------|-------------------|
| <b>3a</b> |            |            |            | 0.52              | -1.36              | -1.83       |             | 1.88              |
| <b>3b</b> |            |            |            | 0.57 <sup>a</sup> | -1.36 <sup>a</sup> |             |             | 1.93              |
| <b>4a</b> | 0.89       | 0.71       | 0.20       | -0.24             | -1.40              | -1.78       | -1.98       | 1.16              |
| <b>4b</b> | 0.75       | 0.63       | 0.19       | -0.23             | -1.54              | -1.63       | -2.06       | 1.31              |
| <b>5a</b> |            |            |            | 0.51              | -1.33              | -1.78       |             | 1.84              |
| <b>5b</b> |            |            |            | 0.65 <sup>a</sup> | -1.40 <sup>a</sup> | -1.86       |             | 2.05              |
| <b>6</b>  | 0.86       | 0.75       | 0.25       | -0.16             | -1.36              | -1.58       | -1.99       | 1.20              |

<sup>a</sup>Irreversible peak; <sup>b</sup>Electrochemical HOMO-LUMO gap,  $\Delta E_{HL} = e(E_{ox,1} - E_{red,1})$ .

**Table S2-2.** Summary of the electrochemical potentials (V) and HOMO-LUMO gaps (eV).

| Compound      | $E_{ox,2}$ | $E_{ox,1}$        | $E_{red,1}$ | $E_{red,2}$ | $E_{red,3}$ | $\Delta E_{HL}^b$ |
|---------------|------------|-------------------|-------------|-------------|-------------|-------------------|
| <b>Ni-P</b>   |            | 0.58 <sup>a</sup> | -1.78       |             |             | 2.36              |
| <b>Ni-DAP</b> |            | 0.85              | -1.32       | -1.99       |             | 2.17              |
| <b>10</b>     | 1.00       | 0.62              | -0.42       | -2.26       | -2.42       | 1.04              |
| <b>12</b>     | 0.77       | 0.61              | -1.28       | -1.79       |             | 1.89              |
| <b>12-ox</b>  | 0.74       | -0.32             | -0.68       |             |             | 0.36              |
| <b>13</b>     |            | 0.75              | -0.28       | -0.67       |             | 1.03              |
| <b>14</b>     |            | 0.53 <sup>a</sup> | -1.26       | -1.77       | -1.89       | 1.79              |
| <b>14-ox</b>  | 0.80       | -0.24             | -0.59       |             |             | 0.35              |
| <b>15</b>     |            | 0.80              | -0.24       | -0.57       |             | 1.04              |

<sup>a</sup>Irreversible peak; <sup>b</sup>Electrochemical HOMO-LUMO gap,  $\Delta E_{HL} = e(E_{ox,1} - E_{red,1})$ .

## 7. X-Ray Crystal Data

The crystals were wrapped in silicon oil and then were frozen. Data collections for all the crystals were performed on a SuperNova diffractometer using graphite-monochromated Cu K $\alpha$  radiation ( $\lambda = 1.54184 \text{ \AA}$ ). Using Olex2,<sup>[1]</sup> the structures of **3b** and **4b** were solved with the olex2.solve<sup>[2]</sup> structure solution program using Charge Flipping,<sup>[3]</sup> the structure of **6-Cl** was solved with the SIR2004<sup>[4]</sup> structure solution program, the structures of **3a**, **5a**, **5b** and **15** were solved with the ShelXT<sup>[5]</sup> structure solution program, the structure of **6** were solved with ShelXS<sup>[6]</sup> structure solution program. All of the above structures were refined with the ShelXL<sup>[7]</sup> refinement package using Least Squares minimization. Due to the highly disordered <sup>t</sup>Bu groups, DFIX restraints were applied to fix 1,2- and 1,3-distances between carbons atoms in <sup>t</sup>Bu groups of **5a**, **5b**, **6** and **6-Cl**. Disordered solvents in **3b**, **4b**, **5b**, **6**, **6-Cl** and **15** were squeezed by using Platon.<sup>[8]</sup>



**Table S3-1.** Crystal data and structure refinement for **3a**.

|                                             |                                                                     |
|---------------------------------------------|---------------------------------------------------------------------|
| Identification code                         | 3a                                                                  |
| Empirical formula                           | C <sub>205</sub> H <sub>229</sub> N <sub>14</sub> Ni <sub>3</sub> O |
| Formula weight                              | 3081.14                                                             |
| Temperature/K                               | 99.9(5)                                                             |
| Crystal system                              | monoclinic                                                          |
| Space group                                 | P2 <sub>1</sub> /c                                                  |
| a/Å                                         | 33.0120(7)                                                          |
| b/Å                                         | 17.7275(3)                                                          |
| c/Å                                         | 30.1749(5)                                                          |
| α/°                                         | 90                                                                  |
| β/°                                         | 91.719(2)                                                           |
| γ/°                                         | 90                                                                  |
| Volume/Å <sup>3</sup>                       | 17651.0(6)                                                          |
| Z                                           | 4                                                                   |
| ρ <sub>calc</sub> /cm <sup>3</sup>          | 1.159                                                               |
| μ/mm <sup>-1</sup>                          | 0.806                                                               |
| F(000)                                      | 6596.0                                                              |
| Crystal size/mm <sup>3</sup>                | 0.3 × 0.3 × 0.02                                                    |
| Radiation                                   | CuKα (λ = 1.54184)                                                  |
| 2θ range for data collection/°              | 7.32 to 133.2                                                       |
| Index ranges                                | -39 ≤ h ≤ 34, -21 ≤ k ≤ 15, -35 ≤ l ≤ 35                            |
| Reflections collected                       | 117754                                                              |
| Independent reflections                     | 31164 [R <sub>int</sub> = 0.0777, R <sub>sigma</sub> = 0.0746]      |
| Data/restraints/parameters                  | 31164/301/2124                                                      |
| Goodness-of-fit on F <sup>2</sup>           | 1.022                                                               |
| Final R indexes [I >= 2σ (I)]               | R <sub>1</sub> = 0.0613, wR <sub>2</sub> = 0.1478                   |
| Final R indexes [all data]                  | R <sub>1</sub> = 0.0832, wR <sub>2</sub> = 0.1625                   |
| Largest diff. peak/hole / e Å <sup>-3</sup> | 0.91/-0.53                                                          |

a)

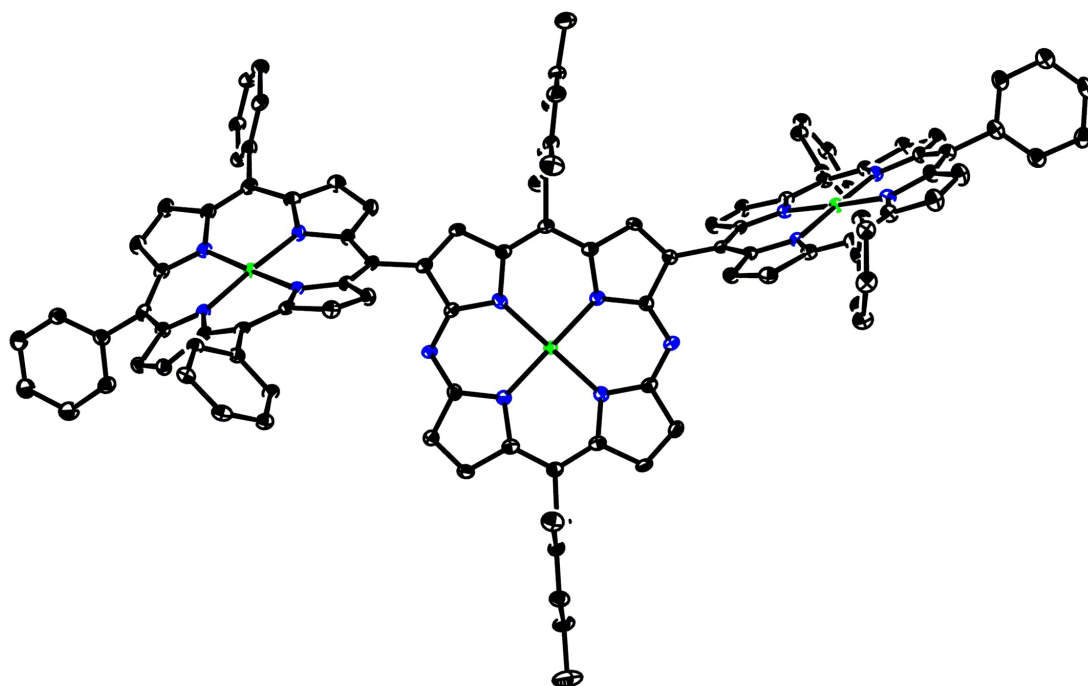

b)

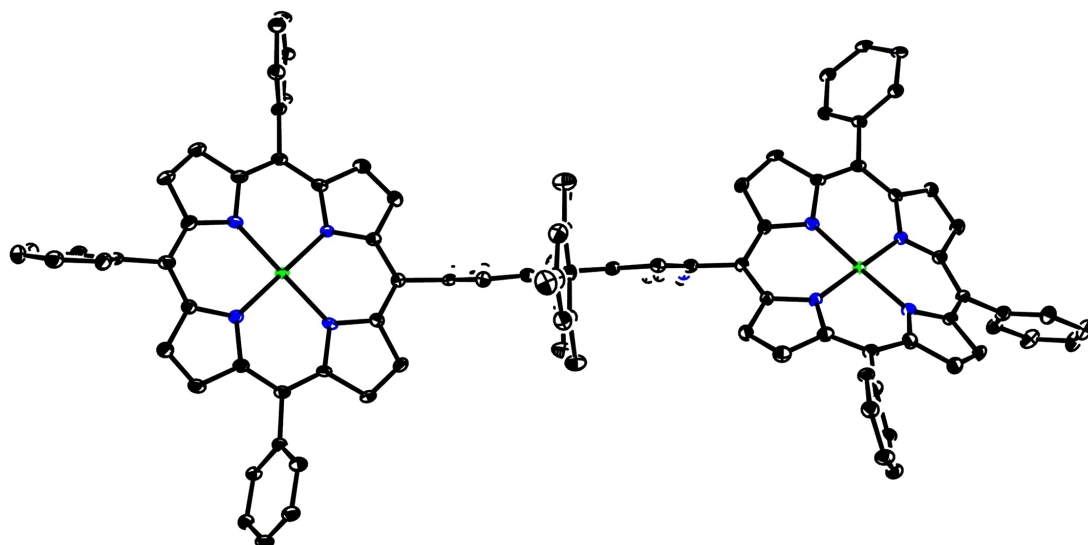

**Figure S5-1.** X-ray crystal structure of **3a**. a) Top view and b) side view. The thermal ellipsoids are scaled to 50% probability level. Solvent molecules, *tert*-butyl groups of *meso*-aryl substituents, and all hydrogen atoms are omitted for clarity.

**Table S3-2.** Crystal data and structure refinement for **3b**.

|                                             |                                                                   |
|---------------------------------------------|-------------------------------------------------------------------|
| Identification code                         | 3b                                                                |
| Empirical formula                           | C <sub>160</sub> H <sub>170</sub> N <sub>14</sub> Ni <sub>3</sub> |
| Formula weight                              | 2465.22                                                           |
| Temperature/K                               | 100.01(10)                                                        |
| Crystal system                              | triclinic                                                         |
| Space group                                 | P-1                                                               |
| a/Å                                         | 12.1732(4)                                                        |
| b/Å                                         | 15.6437(3)                                                        |
| c/Å                                         | 24.1466(4)                                                        |
| α/°                                         | 72.6545(16)                                                       |
| β/°                                         | 80.455(2)                                                         |
| γ/°                                         | 79.266(2)                                                         |
| Volume/Å <sup>3</sup>                       | 4282.51(18)                                                       |
| Z                                           | 1                                                                 |
| ρ <sub>calc</sub> /cm <sup>3</sup>          | 0.956                                                             |
| μ/mm <sup>-1</sup>                          | 0.728                                                             |
| F(000)                                      | 1312.0                                                            |
| Crystal size/mm <sup>3</sup>                | 0.2 × 0.2 × 0.1                                                   |
| Radiation                                   | CuKα (λ = 1.54184)                                                |
| 2θ range for data collection/°              | 9.95 to 133.196                                                   |
| Index ranges                                | -13 ≤ h ≤ 14, -18 ≤ k ≤ 18, -28 ≤ l ≤ 28                          |
| Reflections collected                       | 61516                                                             |
| Independent reflections                     | 15113 [R <sub>int</sub> = 0.0566, R <sub>sigma</sub> = 0.0475]    |
| Data/restraints/parameters                  | 15113/102/882                                                     |
| Goodness-of-fit on F <sup>2</sup>           | 1.018                                                             |
| Final R indexes [I ≥ 2σ (I)]                | R <sub>1</sub> = 0.0604, wR <sub>2</sub> = 0.1527                 |
| Final R indexes [all data]                  | R <sub>1</sub> = 0.0729, wR <sub>2</sub> = 0.1605                 |
| Largest diff. peak/hole / e Å <sup>-3</sup> | 0.83/-0.43                                                        |

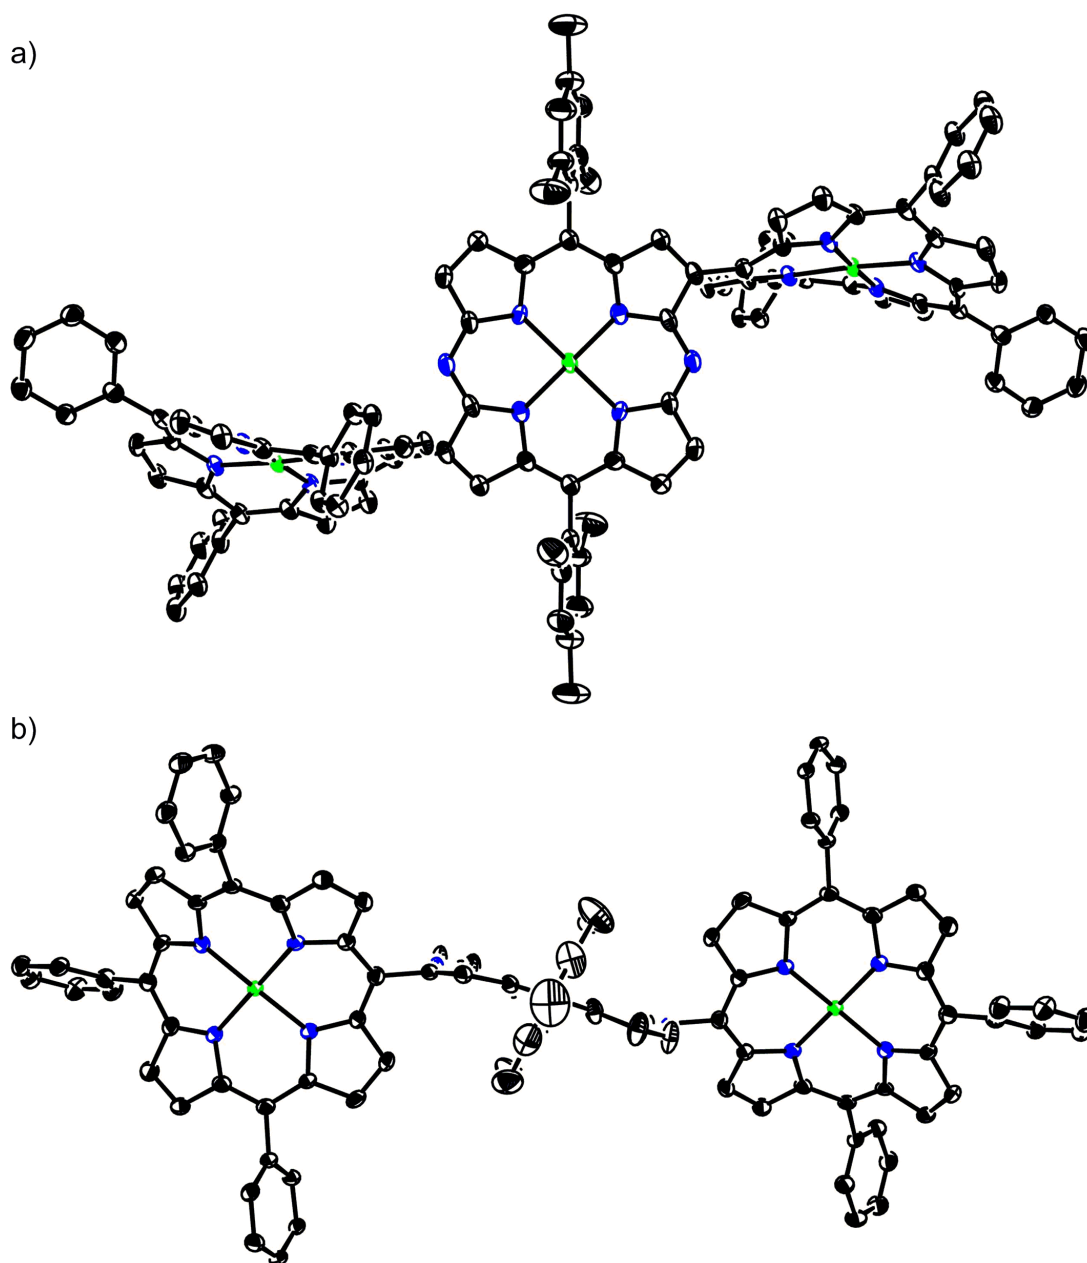

**Figure S5-2.** X-ray crystal structure of **3b**. a) Top view and b) side view. The thermal ellipsoids are scaled to 50% probability level. Solvent molecules, *tert*-butyl groups of *meso*-aryl substituents, and all hydrogen atoms are omitted for clarity.

**Table S3-3.** Crystal data and structure refinement for **4b**.

|                                             |                                                                   |
|---------------------------------------------|-------------------------------------------------------------------|
| Identification code                         | 4b                                                                |
| Empirical formula                           | C <sub>160</sub> H <sub>168</sub> N <sub>14</sub> Ni <sub>3</sub> |
| Formula weight                              | 2463.20                                                           |
| Temperature/K                               | 100.2(5)                                                          |
| Crystal system                              | monoclinic                                                        |
| Space group                                 | P2/n                                                              |
| a/Å                                         | 16.4956(3)                                                        |
| b/Å                                         | 19.5137(8)                                                        |
| c/Å                                         | 27.9638(6)                                                        |
| α/°                                         | 90                                                                |
| β/°                                         | 98.4471(18)                                                       |
| γ/°                                         | 90                                                                |
| Volume/Å <sup>3</sup>                       | 8903.6(4)                                                         |
| Z                                           | 2                                                                 |
| ρ <sub>calc</sub> /cm <sup>3</sup>          | 0.919                                                             |
| μ/mm <sup>-1</sup>                          | 0.701                                                             |
| F(000)                                      | 2620.0                                                            |
| Crystal size/mm <sup>3</sup>                | 0.2 × 0.05 × 0.02                                                 |
| Radiation                                   | CuKα (λ = 1.54184)                                                |
| 2θ range for data collection/°              | 7.062 to 133.198                                                  |
| Index ranges                                | -20 ≤ h ≤ 20, -23 ≤ k ≤ 23, -34 ≤ l ≤ 33                          |
| Reflections collected                       | 15742                                                             |
| Independent reflections                     | 15742 [R <sub>int</sub> = 0.0733, R <sub>sigma</sub> = 0.0468]    |
| Data/restraints/parameters                  | 15742/0/818                                                       |
| Goodness-of-fit on F <sup>2</sup>           | 1.126                                                             |
| Final R indexes [I ≥ 2σ (I)]                | R <sub>1</sub> = 0.0939, wR <sub>2</sub> = 0.2850                 |
| Final R indexes [all data]                  | R <sub>1</sub> = 0.1191, wR <sub>2</sub> = 0.3089                 |
| Largest diff. peak/hole / e Å <sup>-3</sup> | 2.00/-0.93                                                        |

a)

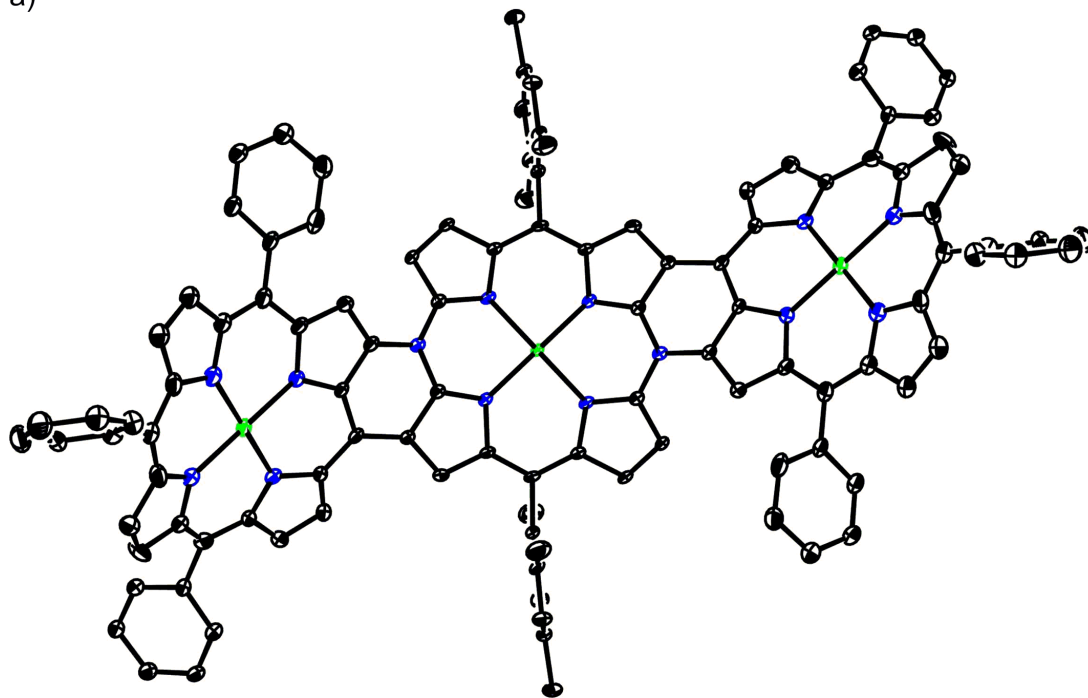

b)

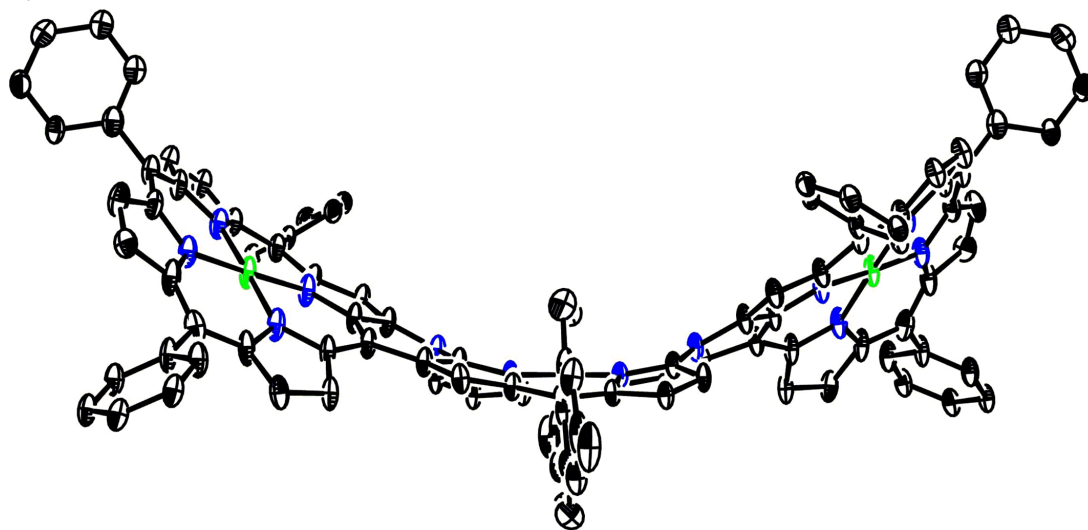

**Figure S5-3.** X-ray crystal structure of **4b**. a) Top view and b) side view. The thermal ellipsoids are scaled to 30% probability level. Solvent molecules, *tert*-butyl groups of *meso*-aryl substituents, and all hydrogen atoms are omitted for clarity.

**Table S3-4.** Crystal data and structure refinement for **5a**.

|                                             |                                                                   |
|---------------------------------------------|-------------------------------------------------------------------|
| Identification code                         | 5a                                                                |
| Empirical formula                           | C <sub>160</sub> H <sub>170</sub> N <sub>14</sub> Ni <sub>3</sub> |
| Formula weight                              | 2465.22                                                           |
| Temperature/K                               | 100.0(2)                                                          |
| Crystal system                              | monoclinic                                                        |
| Space group                                 | P2 <sub>1</sub> /n                                                |
| a/Å                                         | 20.2235(11)                                                       |
| b/Å                                         | 30.1037(7)                                                        |
| c/Å                                         | 27.7552(7)                                                        |
| α/°                                         | 90                                                                |
| β/°                                         | 108.649(4)                                                        |
| γ/°                                         | 90                                                                |
| Volume/Å <sup>3</sup>                       | 16010.2(11)                                                       |
| Z                                           | 4                                                                 |
| ρ <sub>calc</sub> /cm <sup>3</sup>          | 1.023                                                             |
| μ/mm <sup>-1</sup>                          | 0.779                                                             |
| F(000)                                      | 5248.0                                                            |
| Crystal size/mm <sup>3</sup>                | 0.2 × 0.03 × 0.03                                                 |
| Radiation                                   | CuKα (λ = 1.54184)                                                |
| 2θ range for data collection/°              | 7.15 to 133.202                                                   |
| Index ranges                                | -23 ≤ h ≤ 24, -20 ≤ k ≤ 35, -33 ≤ l ≤ 33                          |
| Reflections collected                       | 105696                                                            |
| Independent reflections                     | 28255 [R <sub>int</sub> = 0.0970, R <sub>sigma</sub> = 0.0963]    |
| Data/restraints/parameters                  | 28255/321/1724                                                    |
| Goodness-of-fit on F <sup>2</sup>           | 1.077                                                             |
| Final R indexes [I ≥ 2σ (I)]                | R <sub>1</sub> = 0.1127, wR <sub>2</sub> = 0.3239                 |
| Final R indexes [all data]                  | R <sub>1</sub> = 0.1710, wR <sub>2</sub> = 0.3921                 |
| Largest diff. peak/hole / e Å <sup>-3</sup> | 0.73/-0.59                                                        |

a)

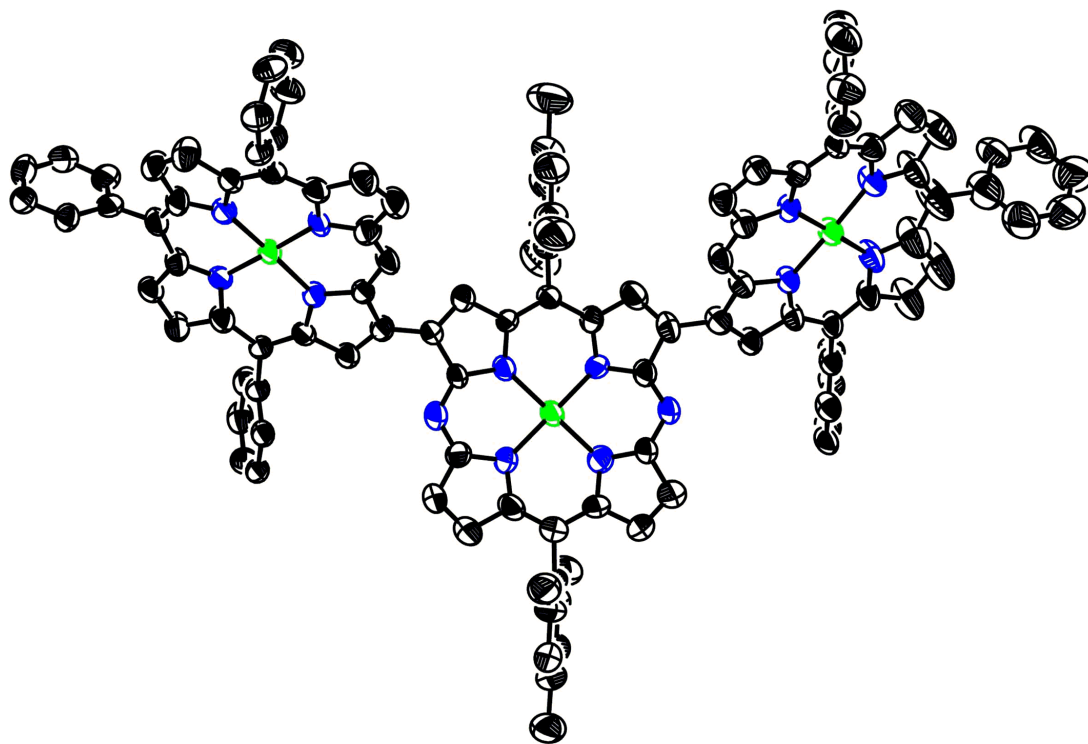

b)

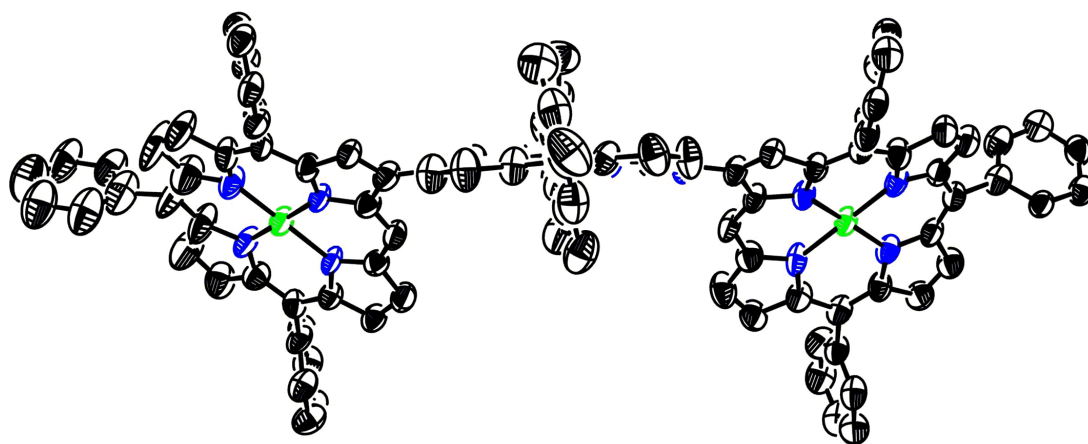

**Figure S5-4.** X-ray crystal structure of **5a**. a) Top view and b) side view. The thermal ellipsoids are scaled to 50% probability level. Solvent molecules, *tert*-butyl groups of *meso*-aryl substituents, and all hydrogen atoms are omitted for clarity.



**Table S3-5.** Crystal data and structure refinement for **5b**.

|                                             |                                                                   |
|---------------------------------------------|-------------------------------------------------------------------|
| Identification code                         | 5b                                                                |
| Empirical formula                           | C <sub>160</sub> H <sub>170</sub> N <sub>14</sub> Ni <sub>3</sub> |
| Formula weight                              | 2465.22                                                           |
| Temperature/K                               | 101(2)                                                            |
| Crystal system                              | triclinic                                                         |
| Space group                                 | P-1                                                               |
| a/Å                                         | 11.99689(17)                                                      |
| b/Å                                         | 15.9669(2)                                                        |
| c/Å                                         | 23.9854(3)                                                        |
| α/°                                         | 73.5180(12)                                                       |
| β/°                                         | 89.4513(11)                                                       |
| γ/°                                         | 80.3482(12)                                                       |
| Volume/Å <sup>3</sup>                       | 4339.82(11)                                                       |
| Z                                           | 1                                                                 |
| ρ <sub>calc</sub> /cm <sup>3</sup>          | 0.943                                                             |
| μ/mm <sup>-1</sup>                          | 0.719                                                             |
| F(000)                                      | 1312.0                                                            |
| Crystal size/mm <sup>3</sup>                | 0.3 × 0.2 × 0.05                                                  |
| Radiation                                   | CuKα (λ = 1.54184)                                                |
| 2θ range for data collection/°              | 7.48 to 133.2                                                     |
| Index ranges                                | -13 ≤ h ≤ 14, -19 ≤ k ≤ 19, -28 ≤ l ≤ 28                          |
| Reflections collected                       | 61951                                                             |
| Independent reflections                     | 15306 [R <sub>int</sub> = 0.0450, R <sub>sigma</sub> = 0.0328]    |
| Data/restraints/parameters                  | 15306/272/931                                                     |
| Goodness-of-fit on F <sup>2</sup>           | 1.094                                                             |
| Final R indexes [I ≥ 2σ (I)]                | R <sub>1</sub> = 0.0625, wR <sub>2</sub> = 0.1625                 |
| Final R indexes [all data]                  | R <sub>1</sub> = 0.0658, wR <sub>2</sub> = 0.1652                 |
| Largest diff. peak/hole / e Å <sup>-3</sup> | 0.72/-0.53                                                        |

a)

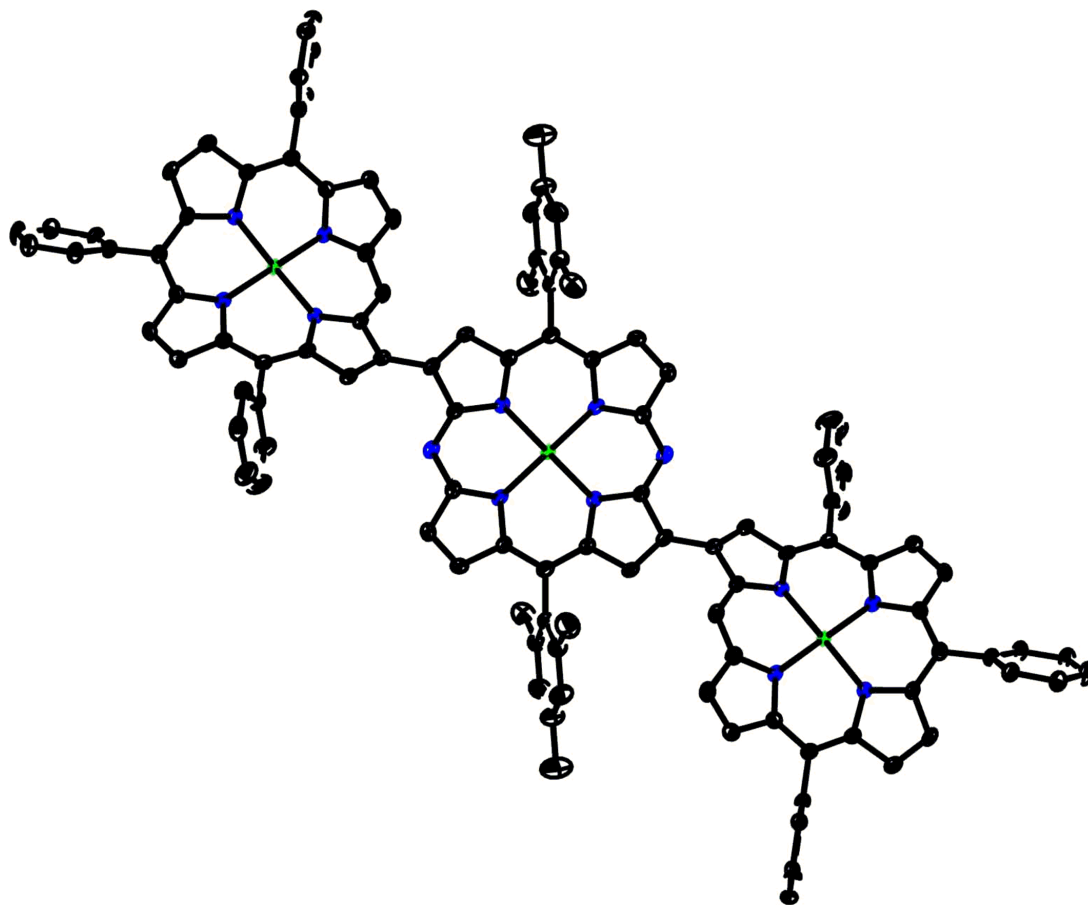

b)

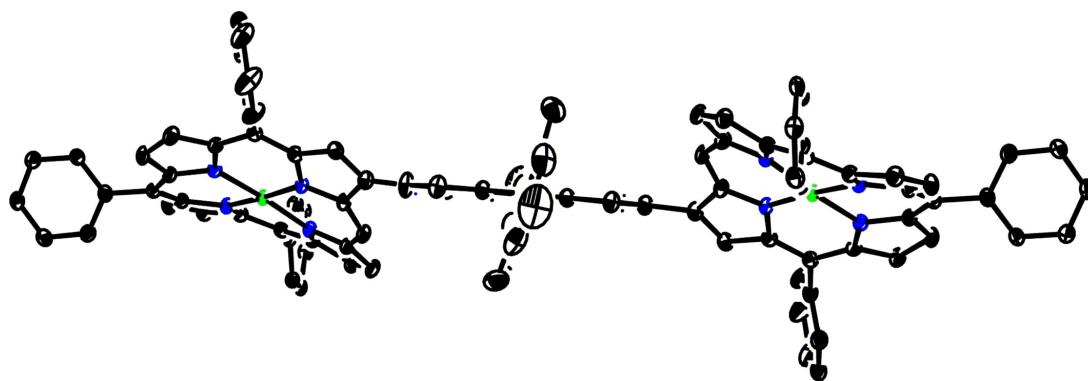

**Figure S5-5.** X-ray crystal structure of **5b**. a) Top view and b) side view. The thermal ellipsoids are scaled to 50% probability level. Solvent molecules, *tert*-butyl groups of *meso*-aryl substituents, and all hydrogen atoms are omitted for clarity.

**Table S3-6.** Crystal data and structure refinement for **6**.

|                                             |                                                                   |
|---------------------------------------------|-------------------------------------------------------------------|
| Identification code                         | 6                                                                 |
| Empirical formula                           | C <sub>160</sub> H <sub>164</sub> N <sub>14</sub> Ni <sub>3</sub> |
| Formula weight                              | 2459.17                                                           |
| Temperature/K                               | 100.27(10)                                                        |
| Crystal system                              | triclinic                                                         |
| Space group                                 | P-1                                                               |
| a/Å                                         | 19.5178(5)                                                        |
| b/Å                                         | 27.7250(9)                                                        |
| c/Å                                         | 28.7677(6)                                                        |
| α/°                                         | 104.436(2)                                                        |
| β/°                                         | 95.669(2)                                                         |
| γ/°                                         | 104.971(3)                                                        |
| Volume/Å <sup>3</sup>                       | 14340.6(7)                                                        |
| Z                                           | 3                                                                 |
| ρ <sub>calc</sub> /cm <sup>3</sup>          | 0.854                                                             |
| μ/mm <sup>-1</sup>                          | 0.653                                                             |
| F(000)                                      | 3918.0                                                            |
| Crystal size/mm <sup>3</sup>                | 0.1 × 0.04 × 0.03                                                 |
| Radiation                                   | CuKα (λ = 1.54184)                                                |
| 2θ range for data collection/°              | 8.658 to 134.16                                                   |
| Index ranges                                | -14 ≤ h ≤ 23, -33 ≤ k ≤ 33, -34 ≤ l ≤ 34                          |
| Reflections collected                       | 82935                                                             |
| Independent reflections                     | 50539 [R <sub>int</sub> = 0.0761, R <sub>sigma</sub> = 0.1492]    |
| Data/restraints/parameters                  | 50539/195/2449                                                    |
| Goodness-of-fit on F <sup>2</sup>           | 0.984                                                             |
| Final R indexes [I ≥ 2σ (I)]                | R <sub>1</sub> = 0.0983, wR <sub>2</sub> = 0.2607                 |
| Final R indexes [all data]                  | R <sub>1</sub> = 0.1492, wR <sub>2</sub> = 0.3045                 |
| Largest diff. peak/hole / e Å <sup>-3</sup> | 1.02/-0.65                                                        |

a)

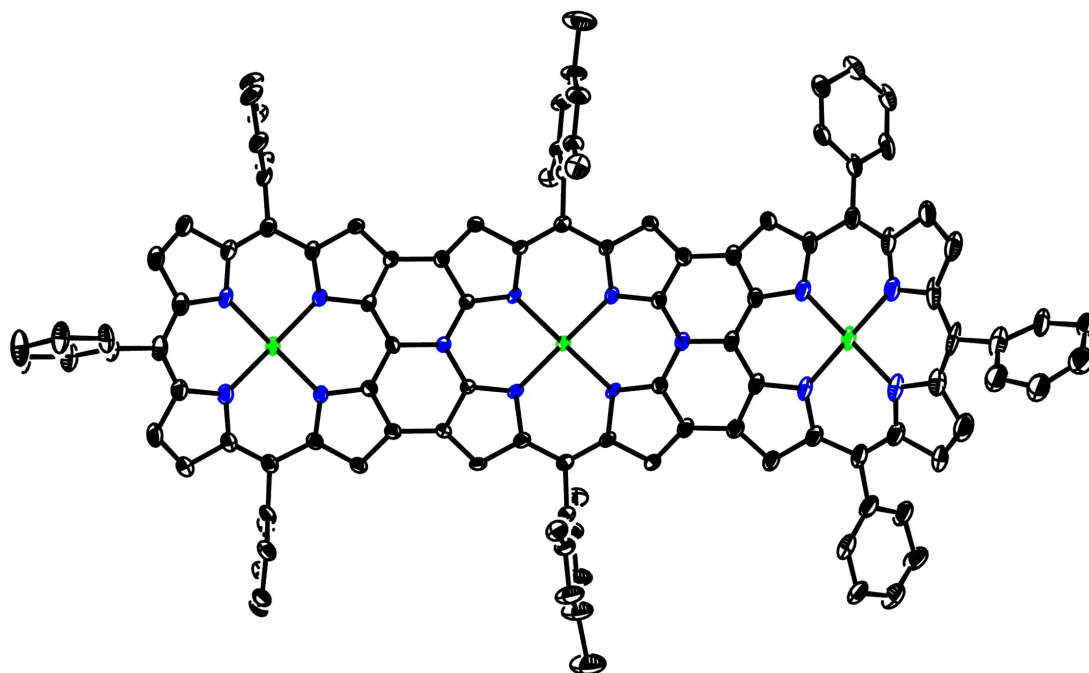

b)

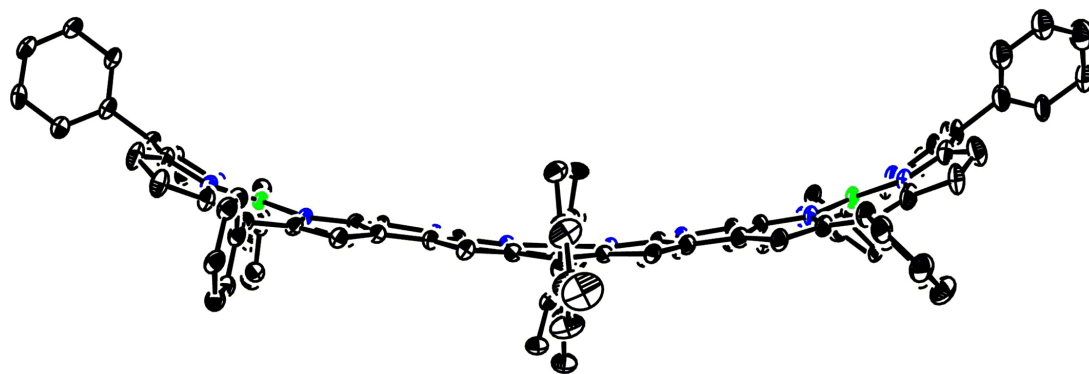

c)

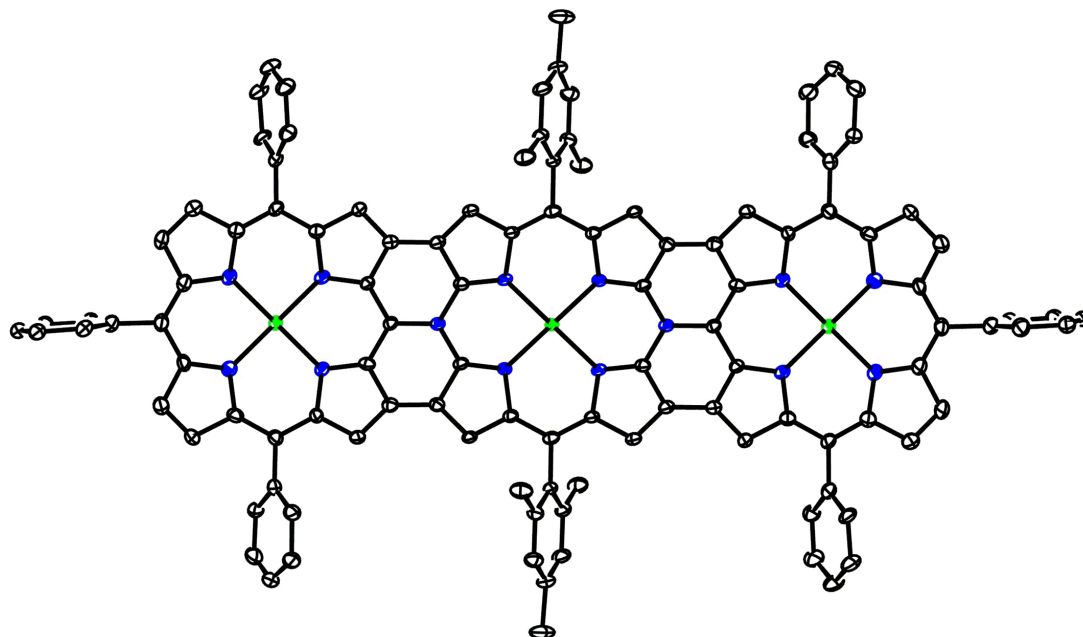

d)

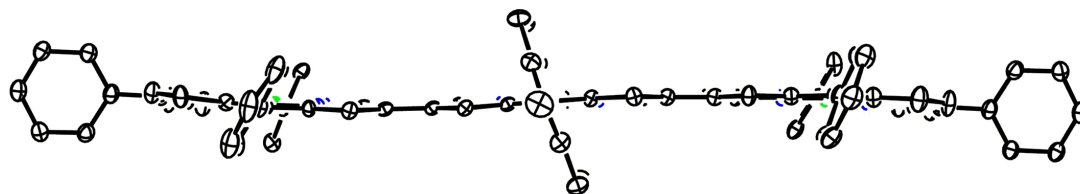

**Figure S5-6.** X-ray crystal structure of **6**. a) Top view and b) side view for one configuration of **6**; c) top view and d) side view for another configuration of **6**. The thermal ellipsoids are scaled to 30% probability level. Solvent molecules, *tert*-butyl groups of *meso*-aryl substituents, and all hydrogen atoms are omitted for clarity.

**Table S3-7.** Crystal data and structure refinement for **6-Cl**.

|                                             |                                                                                   |
|---------------------------------------------|-----------------------------------------------------------------------------------|
| Identification code                         | 6-Cl                                                                              |
| Empirical formula                           | C <sub>480</sub> H <sub>487</sub> Cl <sub>3</sub> N <sub>42</sub> Ni <sub>9</sub> |
| Formula weight                              | 7478.83                                                                           |
| Temperature/K                               | 100.01(10)                                                                        |
| Crystal system                              | triclinic                                                                         |
| Space group                                 | P-1                                                                               |
| a/Å                                         | 19.8298(3)                                                                        |
| b/Å                                         | 27.6668(4)                                                                        |
| c/Å                                         | 28.8267(4)                                                                        |
| α/°                                         | 104.2487(11)                                                                      |
| β/°                                         | 96.2653(12)                                                                       |
| γ/°                                         | 105.3083(13)                                                                      |
| Volume/Å <sup>3</sup>                       | 14526.0(4)                                                                        |
| Z                                           | 1                                                                                 |
| ρ <sub>calc</sub> /cm <sup>3</sup>          | 0.855                                                                             |
| μ/mm <sup>-1</sup>                          | 0.773                                                                             |
| F(000)                                      | 3964.0                                                                            |
| Crystal size/mm <sup>3</sup>                | 0.3 × 0.08 × 0.08                                                                 |
| Radiation                                   | CuKα (λ = 1.54184)                                                                |
| 2θ range for data collection/°              | 8.202 to 133.202                                                                  |
| Index ranges                                | -23 ≤ h ≤ 23, -32 ≤ k ≤ 32, -34 ≤ l ≤ 34                                          |
| Reflections collected                       | 302803                                                                            |
| Independent reflections                     | 51221 [R <sub>int</sub> = 0.0734, R <sub>sigma</sub> = 0.0668]                    |
| Data/restraints/parameters                  | 51221/426/2621                                                                    |
| Goodness-of-fit on F <sup>2</sup>           | 0.959                                                                             |
| Final R indexes [I ≥ 2σ (I)]                | R <sub>1</sub> = 0.0982, wR <sub>2</sub> = 0.2645                                 |
| Final R indexes [all data]                  | R <sub>1</sub> = 0.1384, wR <sub>2</sub> = 0.2935                                 |
| Largest diff. peak/hole / e Å <sup>-3</sup> | 1.15/-0.58                                                                        |

a)

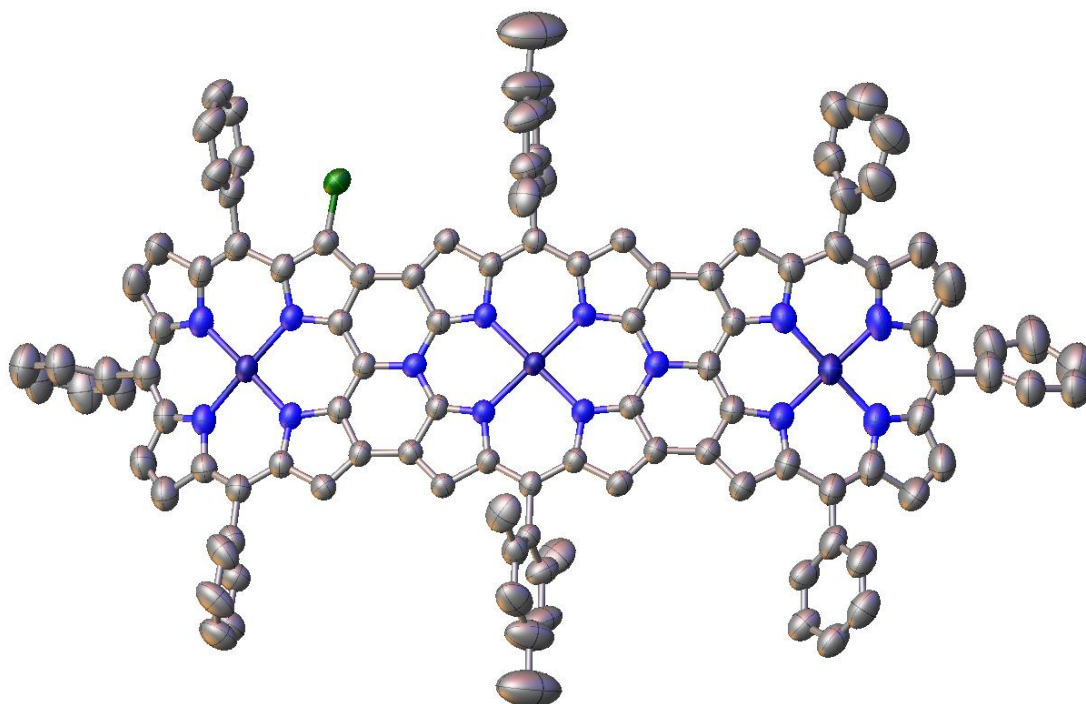

b)

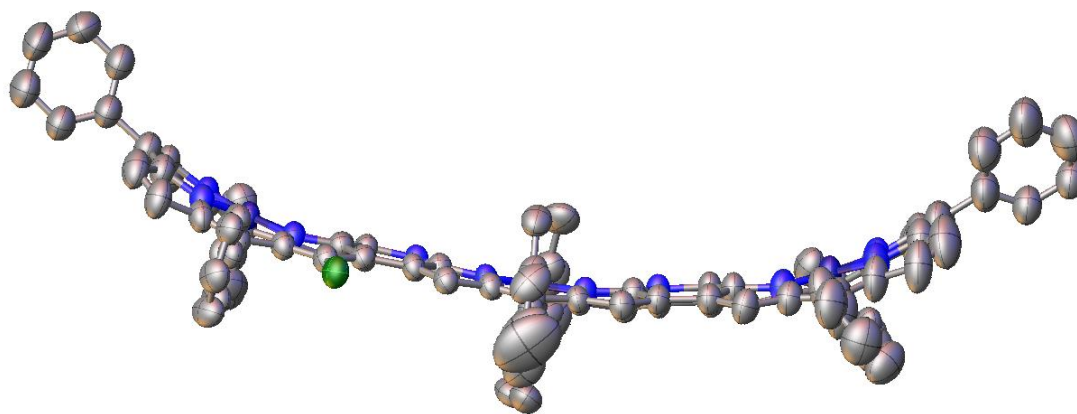

**Figure S5-7.** X-ray crystal structure of **6-Cl**. a) Top view and b) side view for one configuration of **6-Cl**. The thermal ellipsoids are scaled to 50% probability level. Solvent molecules, *tert*-butyl groups of *meso*-aryl substituents, and all hydrogen atoms are omitted for clarity.

**Table S3-8.** Crystal data and structure refinement for **15**.

|                                                |                                                                   |
|------------------------------------------------|-------------------------------------------------------------------|
| Identification code                            | 15                                                                |
| Empirical formula                              | $C_{128}H_{122}Cl_5F_6N_{10}Ni_2Sb$                               |
| Formula weight                                 | 2330.77                                                           |
| Temperature/K                                  | 100.01(10)                                                        |
| Crystal system                                 | triclinic                                                         |
| Space group                                    | P-1                                                               |
| a/Å                                            | 16.6924(4)                                                        |
| b/Å                                            | 19.0219(5)                                                        |
| c/Å                                            | 21.9272(6)                                                        |
| $\alpha/^\circ$                                | 80.695(2)                                                         |
| $\beta/^\circ$                                 | 71.430(2)                                                         |
| $\gamma/^\circ$                                | 72.720(2)                                                         |
| Volume/Å <sup>3</sup>                          | 6284.6(3)                                                         |
| Z                                              | 2                                                                 |
| $\rho_{\text{calc}}/\text{cm}^3$               | 1.232                                                             |
| $\mu/\text{mm}^{-1}$                           | 3.485                                                             |
| F(000)                                         | 2412.0                                                            |
| Crystal size/mm <sup>3</sup>                   | 0.3 × 0.3 × 0.3                                                   |
| Radiation                                      | CuK $\alpha$ ( $\lambda = 1.54184$ )                              |
| 2 $\Theta$ range for data collection/ $^\circ$ | 4.878 to 133.2                                                    |
| Index ranges                                   | -19 ≤ h ≤ 15, -22 ≤ k ≤ 21, -26 ≤ l ≤ 22                          |
| Reflections collected                          | 41474                                                             |
| Independent reflections                        | 22203 [ $R_{\text{int}} = 0.0480$ , $R_{\text{sigma}} = 0.0711$ ] |
| Data/restraints/parameters                     | 22203/542/1462                                                    |
| Goodness-of-fit on F <sup>2</sup>              | 1.033                                                             |
| Final R indexes [ $I \geq 2\sigma(I)$ ]        | $R_1 = 0.1035$ , $wR_2 = 0.2774$                                  |
| Final R indexes [all data]                     | $R_1 = 0.1193$ , $wR_2 = 0.2938$                                  |
| Largest diff. peak/hole / e Å <sup>-3</sup>    | 3.85/-2.76                                                        |



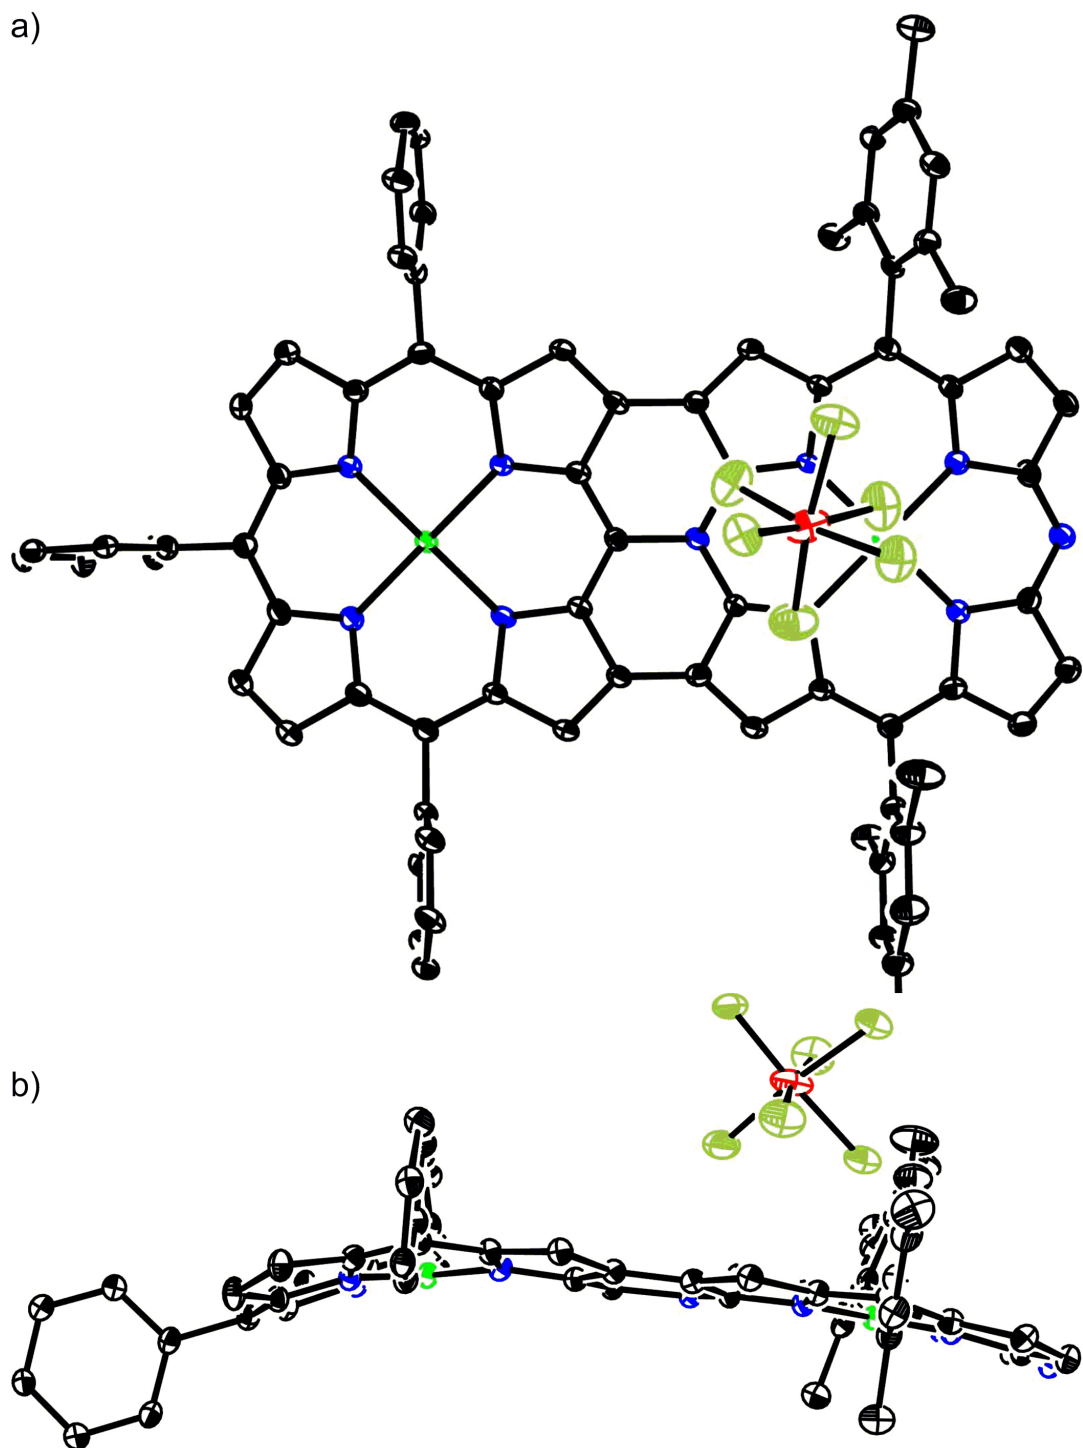

**Figure S5-8.** X-ray crystal structure of **15**. a) Top view and b) side view. The thermal ellipsoids are scaled to 30% probability level. Solvent molecules, *tert*-butyl groups of *meso*-aryl substituents, and all hydrogen atoms are omitted for clarity.

## 8. DFT Calculations

All calculations were carried out using the Gaussian 09 program.<sup>[9]</sup> Initial geometries of **4a**, **4b**, **6** and **10** were from corresponding X-ray structures. Structures were optimized without any symmetry restriction. Geometry optimizations in the ground state were performed by the density functional theory (DFT) with B3LYP (Becke's three-parameter hybrid exchange functionals and the Lee-Yang-Parr correlation functional)<sup>[10]</sup> level employing a basis set of 6-31G(d) for all of the atoms. The nucleus independent chemical shifts (NICS) values were obtained with the GIAO method based on the optimized structures. All of the Bq atoms (noted as A-Z) were placed in the geometrical center of the five- or six-membered rings.

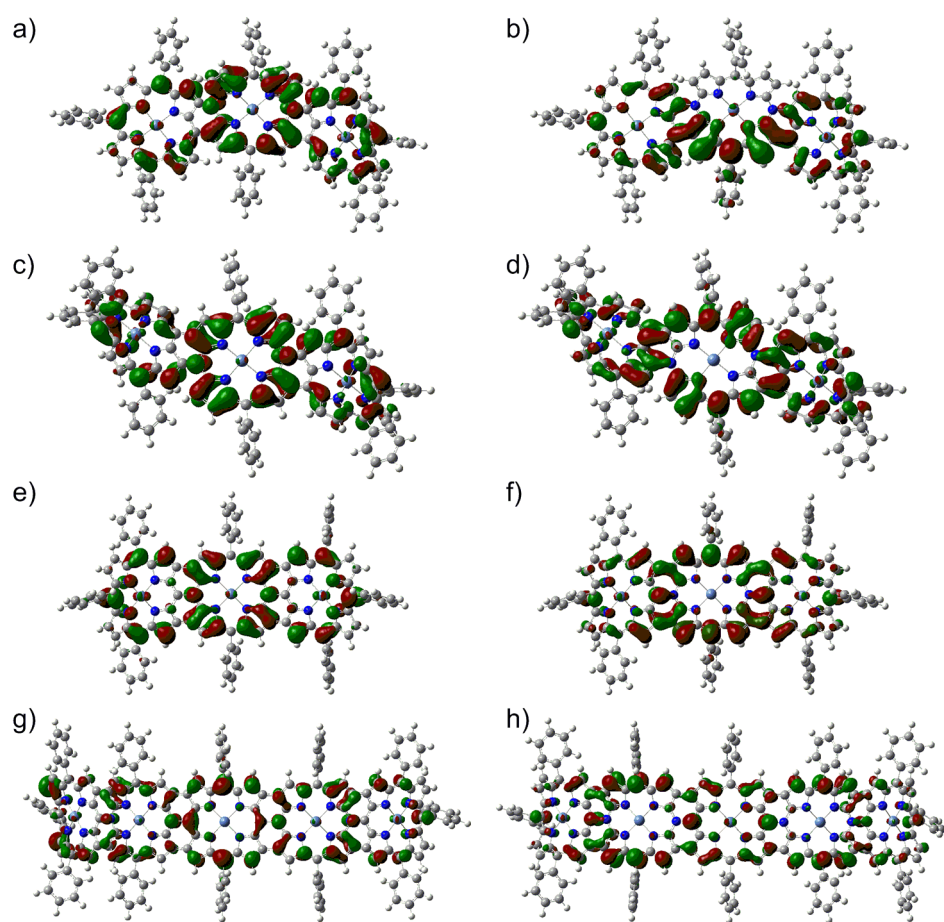

**Figure S6-1.** Molecular orbital diagrams of **4a**, **4b**, **6** and **10**. a) HOMO and b) LUMO of **4a**; c) HOMO and d) LUMO of **4b**; e) HOMO and f) LUMO of **6**; g) HOMO and h) LUMO+1 of **10**. 3,5-Di-*tert*-butylphenyl and 2,4,6-trimethylphenyl are replaced by phenyl for simplification.

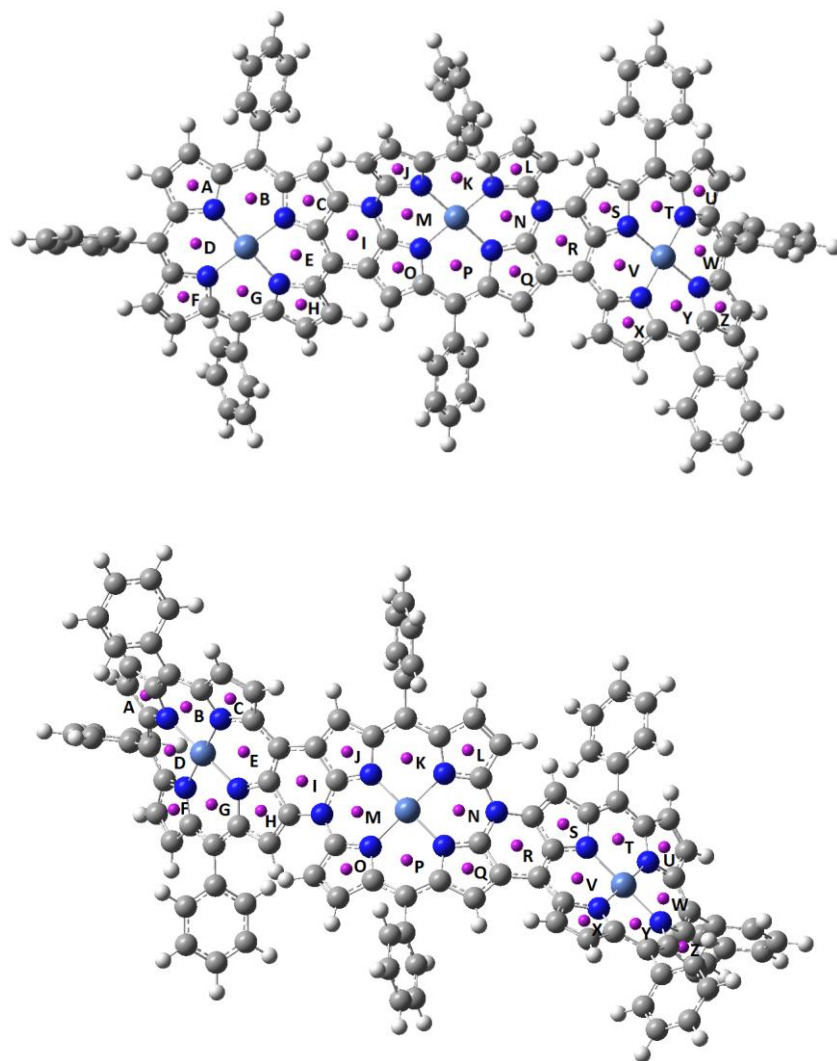

|    | A     | B      | C      | D      | E      | F      | G      | H      | I      | J      | K     | L      | M     |
|----|-------|--------|--------|--------|--------|--------|--------|--------|--------|--------|-------|--------|-------|
| 4a | -5.51 | -17.23 | -10.34 | -16.73 | -16.42 | -6.32  | -16.39 | -6.98  | -1.00  | -5.07  | -1.96 | -5.17  | 1.47  |
| 4b | -6.23 | -16.61 | -7.00  | -16.81 | -16.51 | -5.56  | -17.29 | -10.53 | -0.97  | -5.99  | 1.58  | -4.25  | 0.82  |
|    | N     | O      | P      | Q      | R      | S      | T      | U      | V      | W      | X     | Y      | Z     |
| 4a | 1.06  | -5.03  | 2.13   | -4.62  | -0.89  | -9.89  | -17.10 | -5.79  | -16.37 | -16.86 | -6.94 | -16.38 | -6.11 |
| 4b | 0.88  | -4.16  | 1.59   | -5.89  | -1.07  | -10.55 | -17.21 | -5.57  | -16.61 | -16.83 | -6.97 | -16.72 | -6.43 |

**Figure S6-2.** Calculated NICS(0) values of **4a** and **4b**.

## 9. References

- [1] O. V. Dolomanov, L. J. Bourhis, R. J. Gildea, J. A. K. Howard and H. Puschmann, *J. Appl. Cryst.*, 2009, **42**, 339.
- [2] L. J. Bourhis, O. V. Dolomanov, R. J. Gildea, J. A. K. Howard and H. Puschmann, *Acta Cryst.*, 2015, **A71**, 59.
- [3] L. Palatinus and G. Chapuis, *J. Appl. Cryst.*, 2007, **40**, 786.
- [4] M. C. Burla, R. Caliendo, M. Camalli, B. Carrozzini, G. L. Casciarano, L. De Caro, C.

- Giacovazzo, G. Polidori and R. Spagna, *J. Appl. Cryst.*, 2005, **38**, 381.
- [5] G. M. Sheldrick, *Acta Cryst.*, 2015, **A71**, 3.
- [6] G. M. Sheldrick, *Acta Cryst.*, 2008, **A64**, 112.
- [7] G. M. Sheldrick, *Acta Cryst.*, 2015, **C71**, 3.
- [8] A. L. Spek, *Acta Cryst.*, 2009, **D65**, 148.
- [9] Gaussian 09, Revision D.01, M. J. Frisch, G. W. Trucks, H. B. Schlegel, G. E. Scuseria, M. A. Robb, J. R. Cheeseman, G. Scalmani, V. Barone, B. Mennucci, G. A. Petersson, H. Nakatsuji, M. Caricato, X. Li, H. P. Hratchian, A. F. Izmaylov, J. Bloino, G. Zheng, J. L. Sonnenberg, M. Hada, M. Ehara, K. Toyota, R. Fukuda, J. Hasegawa, M. Ishida, T. Nakajima, Y. Honda, O. Kitao, H. Nakai, T. Vreven, J. A. Jr. Montgomery, J. E. Peralta, F. Ogliaro, M. Bearpark, J. J. Heyd, E. Brothers, K. N. Kudin, V. N. Staroverov, T. Keith, R. Kobayashi, J. Normand, K. Raghavachari, A. Rendell, J. C. Burant, S. S. Iyengar, J. Tomasi, M. Cossi, N. Rega, J. M. Millam, M. Klene, J. E. Knox, J. B. Cross, V. Bakken, C. Adamo, J. Jaramillo, R. Gomperts, R. E. Stratmann, O. Yazyev, A. J. Austin, R. Cammi, C. Pomelli, J. W. Ochterski, R. L. Martin, K. Morokuma, V. G. Zakrzewski, G. A. Voth, P. Salvador, J. J. Dannenberg, S. Dapprich, A. D. Daniels, O. Farkas, J. B. Foresman, J. V. Ortiz, J. Cioslowski, D. J. Fox, Gaussian, Inc., Wallingford CT, 2013.
- [10] (a) A. D. Becke, *J. Chem. Phys.*, 1993, **98**, 1372. (b) C. Lee, W. Yang and R. G. Parr, *Phys. Rev. B*, 1998, **37**, 785.
